# Supplementary material
Source: PubMed Central journal article supplement (PMC3057093)
Supplement: NIHMS117170-supplement-Supporting_Information.pdf [file NIHMS117170-supplement-Supporting_Information.pdf]

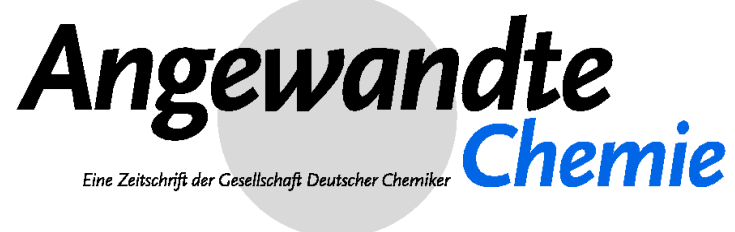

Supporting Information

© Wiley-VCH 2009

69451 Weinheim, Germany

Cycle-Specific Organo-Cascade Catalysis:  
Application to Olefin Hydroamination, Hydro-Oxidation, and Amino-  
Oxidation. The First Use of Organocascade Catalysis in Complex Natural  
Product Synthesis

**Bryon Simmons, Abbas M. Walji and David W. C. MacMillan\***

*Merck Center for Catalysis at Princeton University, Princeton, New Jersey 08544*

## Supporting Information

**General Information.** Commercial reagents were purified prior to use following the guidelines of Perrin and Armarego.<sup>1</sup> All solvents were purified according to the method of Grubbs.<sup>2</sup> Organic solutions were concentrated under reduced pressure on a Büchi rotary evaporator using an ice-water bath for volatile compounds. Chromatographic purification of products was accomplished by flash chromatography on Silicycle F60 silica gel according to the method of Still<sup>3</sup> (where noted, Iatrobeads 6RS-8060 was used in place of silica gel) or using preparatory TLC on Silicycle SiliaPlates (1000  $\mu\text{m}$ , 20  $\times$  20 cm). Thin-layer chromatography (TLC) was performed on Silicycle 250  $\mu\text{m}$  silica gel plates. Visualization of the developed chromatogram was performed by fluorescence quenching, *p*-anisaldehyde or ceric ammonium molybdate stain. <sup>1</sup>H and <sup>13</sup>C NMR spectra were recorded on Varian 400 (400 MHz and 100 MHz) or Bruker 500 (500 and 125 MHz) instruments, and are internally referenced to residual protio solvent signals (note: CDCl<sub>3</sub> referenced at  $\delta$  7.27 and 77.0 ppm respectively). Data for <sup>1</sup>H NMR are reported as follows: chemical shift ( $\delta$  ppm), multiplicity (s = singlet, d = doublet, t = triplet, q = quartet, m = multiplet), integration, coupling constant (Hz) and assignment. Data for <sup>13</sup>C NMR are reported in terms of chemical shift and no special nomenclature is used for equivalent carbons. IR spectra were recorded on a Perkin Elmer Paragon 1000 spectrometer and are reported in terms of frequency of absorption ( $\text{cm}^{-1}$ ). High resolution mass spectra were obtained at Princeton University mass spectrometry facilities. Supercritical fluid chromatography (SFC) was performed on a Berger Minigram equipped with a diode array UV detector ( $\lambda$  = 214–258 nm) using a chiral column (25 cm) and guard column (5 cm) as noted for each compound. Gas liquid

chromatography (GLC) was performed on a Hewlett-Packard 6850 Series chromatographs with split-mode capillary injection and FID detection using a chiral column (30 m × 0.25 mm) and guard column as noted for each compound.

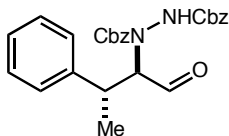

***N*-((1*R*,2*R*)-1-Formyl-2-phenylpropyl)-*N*'-(benzyloxycarbonyl)hydrazinecarboxylic acid benzyl ester:**

***Procedure A:*** 3-Phenyl-but-2-enal (36.6 mg, 0.250 mmol), di-*tert*-butyl-1,4-dihydro-2,6-dimethylpyridine-3,5-dicarboxylate (92.8 mg, 0.300 mmol) and CH<sub>2</sub>Cl<sub>2</sub> (500 μL) were charged into a 4 mL vial equipped with septum and a magnetic stir bar and then cooled to –30 °C. After stirring 15 min at –30 °C, the catalysts (2*R*)-2-*tert*-butyl-3-methylimidazolidin-4-one trichloroacetic acid salt (8.0 mg, 0.025 mmol) and L-proline (8.7 mg, 0.075 mmol) were added in one portion with stirring, and the resulting solution was stirred 36 h at –30 °C, at which point a solution of dibenzyl azodicarboxylate (90 wt%, 54.6 mg, 0.165 mmol) in CH<sub>2</sub>Cl<sub>2</sub> (1.0 mL) was added, and the reaction mixture was allowed to warm to –15 °C and stirred for an additional 10 h at –15 °C then filtered through an iatrobead pad with EtOAc. Rapid purification (<15 min to avoid partial epimerization at α-amino stereocenter) by flash column chromatography using iatrobeads as the stationary phase (10-50% EtOAc/hexanes) afforded the title compound as a white solid (55.0 mg, 75% yield, 6:1 dr, 99% ee).

***Procedure B:*** 3-Phenyl-but-2-enal (36.6 mg, 0.250 mmol), di-*tert*-butyl-1,4-dihydro-2,6-dimethylpyridine-3,5-dicarboxylate (92.8 mg, 0.300 mmol) and CH<sub>2</sub>Cl<sub>2</sub> (500 μL) were charged into 4 mL vial with magnetic stir bar and cooled to –30 °C. After stirring 15 min at –30 °C, (2*R*)-2-*tert*-butyl-3-methylimidazolidin-4-one trichloroacetic acid salt (8.0 mg, 0.025 mmol) was added in one portion with stirring, and the resulting solution was stirred 36 h at –30 °C, at which point L-proline (8.7 mg, 0.075 mmol) was added followed by a solution of dibenzyl azodicarboxylate (90 wt%, 54.6 mg, 0.165 mmol) in CH<sub>2</sub>Cl<sub>2</sub> (1.0 mL) in one portion, and the reaction mixture was allowed to warm to –15 °C. The reaction mixture was stirred for an additional 10 h at –15 °C, then filtered through an iatrobead pad with EtOAc, and concentrated by rotary evaporation.

Rapid purification by flash column chromatography (<15 min to avoid partial epimerization at  $\alpha$ -amino stereocenter) using iatrobeads as the stationary phase (10-50% EtOAc/hexanes) afforded the title compound as a white solid (57.0 mg, 77% yield, 8:1 dr, 99% ee). IR (film) 1716, 1402, 1292, 1216, 906  $\text{cm}^{-1}$ ;  $^1\text{H}$  NMR (400 MHz,  $\text{CDCl}_3$ )  $\delta$  1.15-1.63 (m, 3H,  $\text{CHCH}_3$ ), 3.25-3.53 (m, 1H,  $\text{PhMeCH}$ ), 4.51-4.78 (m, 1H,  $\text{NCHCHO}$ ), 4.91-5.31 (m, 4H,  $\text{PhCH}_2$ ), 5.87-6.12 (m, 1H, NH), 7.10-7.48 (m, 15H, PhH), 9.93 (s, 1H, CHO);  $^{13}\text{C}$  NMR (100 MHz,  $\text{CDCl}_3$ )  $\delta$  19.9, 37.6, 67.9, 68.4, 72.0, 127.1, 127.2, 127.6, 127.7, 128.3, 128.4, 128.6, 128.7, 128.8, 135.1, 135.3, 142.6, 155.6, 155.8, 197.4 (additional peaks and line broadenings are observed due to rotameric species); HRMS (EI) exact mass calculated for ( $\text{C}_{26}\text{H}_{26}\text{N}_2\text{O}_5$ ) requires  $m/z$  446.1842, found  $m/z$  446.1827.  $[\alpha]_D^{23} = +56.5$  ( $c = 0.100$ ,  $\text{CHCl}_3$ ). The diastereomeric ratio was determined by  $^1\text{H}$  NMR analysis of the crude reaction mixture (CHO major 9.93 ppm, minor 9.22 ppm). The enantiomeric ratio was determined by SFC analysis of the corresponding alcohol (following  $\text{NaBH}_4$  reduction) using a Chiralcel AD-H (25 cm  $\times$  0.46 cm) column (5% to 50% MeOH, linear gradient, 100 bar, 35  $^\circ\text{C}$  oven, flow = 4.0 mL/min);  $t_r = 6.48$  min (major) and 7.80 min (minor).

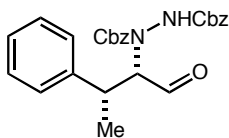

***N*-((1*S*,2*R*)-1-Formyl-2-phenylpropyl)-*N*'-(benzyloxycarbonyl)hydrazinecarboxylic acid benzyl ester:**

**Procedure A:** 3-Phenyl-but-2-enal (36.6 mg, 0.250 mmol), di-*tert*-butyl-1,4-dihydro-2,6-dimethylpyridine-3,5-dicarboxylate (92.8 mg, 0.300 mmol) and  $\text{CH}_2\text{Cl}_2$  (500  $\mu\text{L}$ ) were charged into a 4 mL vial equipped with septum and a magnetic stir bar and then cooled to  $-30$   $^\circ\text{C}$ . After stirring 15 min at  $-30$   $^\circ\text{C}$ , the catalysts (2*R*)-2-*tert*-butyl-3-methylimidazolidin-4-one trichloroacetic acid salt (8.0 mg, 0.025 mmol) and D-proline (8.7 mg, 0.075 mmol) were added in one portion with stirring, and the resulting solution was stirred 36 h at  $-30$   $^\circ\text{C}$ , at which point a solution of dibenzyl azodicarboxylate (90 wt%, 54.6 mg, 0.165 mmol) in  $\text{CH}_2\text{Cl}_2$  (1.0 mL) was added, and the reaction mixture was allowed to warm to  $-15$   $^\circ\text{C}$  and stirred for an additional 6 h at  $-15$   $^\circ\text{C}$  then filtered through an iatrobead pad with EtOAc. Rapid purification (<15 min to avoid partial epimerization at  $\alpha$ -amino stereocenter) by flash column chromatography using

iatrobeads as the stationary phase (10-50% EtOAc/hexanes) afforded the title compound as a white solid (60.3 mg, 82% yield, 8:1 dr, 99% ee).

**Procedure B:** 3-Phenyl-but-2-enal (36.6 mg, 0.250 mmol), di-*tert*-butyl-1,4-dihydro-2,6-dimethylpyridine-3,5-dicarboxylate (92.8 mg, 0.300 mmol) and CH<sub>2</sub>Cl<sub>2</sub> (500 μL) were charged into a 4 mL vial equipped with septum and a magnetic stir bar and then cooled to -30 °C. After stirring 15 min at -30 °C, (2*R*)-2-*tert*-butyl-3-methylimidazolidin-4-one trichloroacetic acid salt (8.0 mg, 0.025 mmol) was added in one portion with stirring, and the resulting solution was stirred 36 h at -30 °C, at which point D-proline (8.7 mg, 0.075 mmol) was added, followed by a solution of dibenzyl azodicarboxylate (90 wt%, 54.6 mg, 0.165 mmol) in CH<sub>2</sub>Cl<sub>2</sub> (1.0 mL) in one portion, and the reaction mixture was allowed to warm to -15 °C and stirred for an additional 6 h at -15 °C then filtered through an iatrobead pad with EtOAc. Rapid purification (<15 min to avoid partial epimerization at α-amino stereocenter) by flash column chromatography using iatrobeads as the stationary phase (10-50% EtOAc/hexanes) afforded the title compound as a white solid (58.8 mg, 80% yield, 10:1 dr, 99% ee). IR (film) 1713, 1293, 1213, 905 cm<sup>-1</sup>; <sup>1</sup>H NMR (400 MHz, CDCl<sub>3</sub>) δ 1.35-1.64 (m, 3H, CHCH<sub>3</sub>), 3.29 (bs, 1H, PhMeCH), 4.75-5.18 (m, 1H, NCHCHO), 5.20 (bs, 4H, PhCH<sub>2</sub>), 6.87 (bs, 1H, NH), 7.18-7.43 (m, 15H, PhH), 9.22 (bs, 1H, CHO); <sup>13</sup>C NMR (100 MHz, CDCl<sub>3</sub>) δ 20.3, 38.9, 67.7, 68.6, 72.0, 127.3, 127.6, 128.0, 128.1, 128.3, 128.4, 128.5, 128.8, 129.1, 135.3, 135.4, 141.8, 155.9, 156.6, 199.7 (additional peaks and line broadenings are observed due to rotameric species); HRMS (EI) exact mass calculated for (C<sub>26</sub>H<sub>26</sub>N<sub>2</sub>O<sub>5</sub>) requires *m/z* 446.1842, found *m/z* 446.1850.  $[\alpha]_D^{23} = +15.1$  (c = 0.100, CHCl<sub>3</sub>). The diastereomeric ratio was determined by <sup>1</sup>H NMR analysis of the crude reaction mixture (CHO major 9.22 ppm, minor 9.93 ppm). The enantiomeric ratio was determined by SFC analysis of the corresponding alcohol (following NaBH<sub>4</sub> reduction) using a Chiralcel AD-H (25 cm × 0.46 cm) column (5% to 50% MeOH, linear gradient, 100 bar, 35 °C oven, flow = 4.0 mL/min); *t<sub>r</sub>* = 7.17 min (minor) and 7.52 min (major). The relative stereochemistry was proven by chemical derivatization to a known related compound (see below).<sup>4</sup>

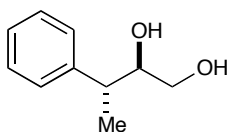

**(2R,3R)-3-Phenylbutane-1,2-diol:**

**Procedure A:** To a 4 mL vial equipped with a magnetic stir bar was added 3-phenyl-but-2-enal (36.6 mg, 0.250 mmol), and di-*tert*-butyl-1,4-dihydro-2,6-dimethylpyridine-3,5-dicarboxylate (88.4 mg, 0.290 mmol). This mixture was dissolved in chloroform (200  $\mu$ L) and cooled to  $-30$   $^{\circ}$ C. After stirring for 10 min, the catalysts (*2R*)-2-*tert*-butyl-3-methyl-imidazolidin-4-one trichloroacetic acid salt (8.0 mg, 25  $\mu$ mol) and L-proline (8.7 mg, 75  $\mu$ mol) were added. The reaction was allowed to stir for 24 h then warmed to room temperature after which a solution of nitrosobenzene (22.0 mg, 0.210 mmol) in DMSO (0.750  $\mu$ L) was added. The reaction mixture was allowed to stir for 30 min (reaction progress followed by TLC and color change from green to orange), then transferred to solution of NaBH<sub>4</sub> (28.5 mg, 0.750 mmol) in ethanol (1.0 mL) and allowed to stir for 2 h at room temperature. Excess NaBH<sub>4</sub> was quenched with addition of water and extracted with diethyl ether, dried with MgSO<sub>4</sub> and concentrated under reduced pressure. The crude reaction mixture was dissolved in ethanol and 10% Pd on charcoal (18.0 mg, 50 wt%) was added. The reaction vessel was purged with hydrogen and stirred under a positive pressure of hydrogen (1 atm) for 12 h. The reaction mixture was filtered through a pad of celite and concentrated under reduced pressure. Purification using silica gel chromatography (50% to 100% Et<sub>2</sub>O/pentane) gave the title compound as a colorless oil (25.0 mg, 73% yield, 11:1 dr, 99% ee).

**Procedure B:** To a 4 mL vial equipped with a magnetic stir bar was added 3-phenyl-but-2-enal (73.1 mg, 0.500 mmol), and di-*tert*-butyl-1,4-dihydro-2,6-dimethylpyridine-3,5-dicarboxylate (177 mg, 0.580 mmol). This mixture was dissolved in chloroform (400  $\mu$ L) and cooled to  $-30$   $^{\circ}$ C. After stirring for 10 min, a (*2R*)-2-*tert*-butyl-3-methyl-imidazolidin-4-one trichloroacetic acid salt (16.0 mg, 50  $\mu$ mol) was added. The reaction was allowed to stir for 24 h then warmed to room temperature after which L-proline (17.2 mg, 150  $\mu$ mol) followed by a solution of nitrosobenzene (44.0 mg, 0.420 mmol) in DMSO (1.50 mL) was added. The reaction mixture was allowed to stir for 30 min (reaction progress followed by TLC and color change from green to orange), then transferred to solution of NaBH<sub>4</sub> (57.0 mg, 1.50 mmol) in ethanol (2.0 mL) and allowed to stir for 2 h at room temperature. Excess NaBH<sub>4</sub> was quenched with addition of water and extracted with diethyl ether, dried with MgSO<sub>4</sub> and concentrated under reduced pressure. The crude reaction mixture was dissolved in ethanol and 10% Pd on charcoal (36.0 mg, 50 wt%) was added. The reaction vessel was purged with hydrogen and stirred under a positive pressure

of hydrogen (1 atm ) for 12 h. The reaction mixture was filtered through a pad of celite and concentrated under reduced pressure. Purification using silica gel chromatography (10% to 100% EtOAc/hexanes) gave the title compound as a colorless oil (49.3 mg, 71% yield, 16:1 dr, 99% ee). IR (film) 3400, 2965, 2930, 2877, 1717, 1452, 1059  $\text{cm}^{-1}$ ;  $^1\text{H}$  NMR (300 MHz,  $\text{CDCl}_3$ )  $\delta$  1.28 (d, 3H,  $J = 7.0$  Hz,  $\text{CH}_3$ ), 1.95 (bs, 1H, OH), 2.21 (bs, 1H, OH), 2.88 (app. quintet, 1H,  $J = 7.0$  Hz, ArMeCH), 3.50-3.60 (m, 1H,  $\text{CHOH}$ ), 3.70-3.90 (m, 2H,  $\text{CH}_2\text{OH}$ ), 7.20-7.50 (m, 5H, ArH);  $[\alpha]_D^{23} = +14.9$  ( $c = 0.90$ ,  $\text{CHCl}_3$ ). The spectroscopic data are consistent with previously reported data.<sup>5</sup> The diastereomeric ratio was determined by  $^1\text{H}$  NMR analysis of the crude reaction mixture ( $\text{CH}_3$ , major 1.28 ppm minor 1.38 ppm). The enantiomeric ratio was determined by SFC analysis using a Chiralcel OJ-H (25 cm  $\times$  0.46 cm) column (5% to 10% MeOH, linear gradient, 100 bar, 35  $^\circ\text{C}$  oven, flow = 4.0 mL/min);  $t_r = 3.05$  min (minor) and 3.29 min (major).

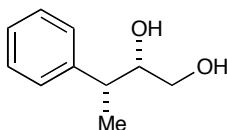

**(2*S*,3*R*)-3-Phenylbutane-1,2-diol:**

**Procedure A:** To a 4 mL vial equipped with a magnetic stir bar was added 3-phenyl-but-2-enal (36.6 mg, 0.250 mmol), and di-*tert*-butyl-1,4-dihydro-2,6-dimethylpyridine-3,5-dicarboxylate (88.4 mg, 0.290 mmol). This mixture was dissolved in chloroform (200  $\mu\text{L}$ ) and cooled to  $-30$   $^\circ\text{C}$ . After stirring for 10 min, the catalysts (*2R*)-2-*tert*-butyl-3-methyl-imidazolidin-4-one trichloroacetic acid salt (8.0 mg, 25  $\mu\text{mol}$ ) and D-proline (8.7 mg, 75  $\mu\text{mol}$ ) were added. The reaction was allowed to stir for 24 h then warmed to room temperature after which a solution of nitrosobenzene (22.0 mg, 0.210 mmol) in DMSO (0.750  $\mu\text{L}$ ) was added. The reaction mixture was allowed to stir for 30 min (reaction progress followed by TLC and color change from green to orange), then transferred to solution of  $\text{NaBH}_4$  (28.5 mg, 0.750 mmol) in ethanol (1.0 mL) and allowed to stir for 2 h at room temperature. Excess  $\text{NaBH}_4$  was quenched with addition of water and extracted with diethyl ether, dried with  $\text{MgSO}_4$  and concentrated under reduced pressure. The crude reaction mixture was dissolved in ethanol and 10% Pd on charcoal (18.0 mg, 50 wt%) was added. The reaction vessel was purged with hydrogen and stirred under a positive pressure of hydrogen (1 atm ) for 12 h. The reaction mixture was filtered through a pad of celite and

concentrated under reduced pressure. Purification using silica gel chromatography (50% to 100% Et<sub>2</sub>O/pentane) gave the title compound as a colorless oil (22.0 mg, 65% yield, 3:1 dr, 99% ee).

**Procedure B:** To a 4 mL vial equipped with a magnetic stir bar was added 3-phenyl-but-2-enal (73.1 mg, 0.500 mmol), and di-*tert*-butyl-1,4-dihydro-2,6-dimethylpyridine-3,5-dicarboxylate (177 mg, 0.580 mmol). This mixture was dissolved in chloroform (400  $\mu$ L) and cooled to -30 °C. After stirring for 10 min, (2*R*)-2-*tert*-butyl-3-methyl-imidazolidin-4-one trichloroacetic acid salt (16 mg, 50  $\mu$ mol) was added. The reaction was allowed to stir for 24 h then warmed to room temperature after which and D-proline (17.2 mg, 150  $\mu$ mol) followed by a solution of nitrosobenzene (44.0 mg, 0.410 mmol) in DMSO (1.50 mL) was added. The reaction mixture was allowed to stir for 30 min (reaction progress followed by TLC and color change from green to orange), then transferred to solution of NaBH<sub>4</sub> (57.0 mg, 1.50 mmol) in ethanol (2.0 mL) and allowed to stir for 2 h at room temperature. Excess NaBH<sub>4</sub> was quenched with addition of water and extracted with diethyl ether, dried with MgSO<sub>4</sub> and concentrated under reduced pressure. The crude reaction mixture was dissolved in ethanol and 10% Pd on charcoal (36.0 mg, 50 wt%) was added. The reaction vessel was purged with hydrogen and stirred under a positive pressure of hydrogen (1 atm) for 12 h. The reaction mixture was filtered through a pad of celite and concentrated under reduced pressure. Purification using silica gel chromatography (10 to 100% EtOAc/hexanes) gave the title compound as a colorless oil (42.0 mg, 62% yield, 10:1 dr, 99% ee). IR (film) 3369, 2963, 2929, 2877, 1721, 1493, 1452, 1061 cm<sup>-1</sup>; <sup>1</sup>H NMR (300 MHz, CDCl<sub>3</sub>)  $\delta$  1.38 (d, 3H, *J* = 7.0 Hz, CH<sub>3</sub>), 1.95 (bs, 1H, OH), 2.21 (bs, 1H, OH), 2.88 (app. quintet, *J* = 7.0 Hz, ArMeCH), 3.30-3.40 (m, 1H, CHOH), 3.50-3.55 (m, 1H, CHOH), 3.70-3.80 (m, 1H, CHOH), 7.20-7.50 (m, 5H, ArH); <sup>13</sup>C NMR (75 MHz, CDCl<sub>3</sub>)  $\delta$  17.3, 42.8 65.1, 76.1, 126.6 127.5, 128.7, 143.6; HRMS (EI+) exact mass calculated for (C<sub>10</sub>H<sub>14</sub>O<sub>2</sub>) requires *m/z* 166.0994, found *m/z* 166.0994.  $[\alpha]_D^{23} = -2.0$  (*c* = 0.80, CHCl<sub>3</sub>). The diastereomeric ratio was determined by <sup>1</sup>H NMR analysis of the crude reaction mixture (CH<sub>3</sub>, major 1.38 ppm minor 1.28 ppm). The enantiomeric ratio was determined by SFC analysis using a Chiralcel AD-H (25 cm  $\times$  0.46 cm) column (5% to 10% MeOH, linear gradient, 100 bar, 35 °C oven, flow = 4.0 mL/min); *t<sub>r</sub>* = 5.61 min (minor) and 5.91 min (major).



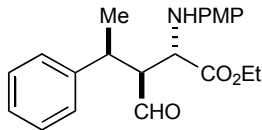**(2S,3S,4S)-Ethyl-2-(4-methoxyphenylamino)-3-formyl-2-4-phenylpentanoate:**

**Procedure A:** To a 4 mL vial equipped with a magnetic stir bar was added 3-phenyl-but-2-enal (21.0 mg, 0.144 mmol) and di-*tert*-butyl-1,4-dihydro-2,6-dimethylpyridine-3,5-dicarboxylate (53.8 mg, 0.174 mmol). This mixture was dissolved in chloroform (400  $\mu$ L) and cooled to  $-30$   $^{\circ}$ C. After stirring for 10 min, the catalysts, (*2R*)-2-*tert*-butyl-3-methyl-imidazolidin-4-one trichloroacetic acid salt (5.1 mg, 16  $\mu$ mol) and L-proline (5.5 mg, 48  $\mu$ mol) were added and the reaction was allowed to stir for 24 hr. The reaction mixture was then warmed to room temperature and a premixed solution of (*E*)-ethyl 2-(4-methoxyphenylimino)ethanoate (36 mg, 0.174 mmol) in DMSO (1.5 mL) was added and the resulting mixture was allowed to stir at room temperature for 6 h. A premixed solution (1:1) of saturated  $\text{NH}_4\text{Cl}$  and diethyl ether was added to the reaction with vigorous stirring. The layers were separated and the organic phase was washed with brine. The combined organic phases were dried with  $\text{MgSO}_4$ , concentrated under reduced pressure and purified by chromatography on iatrobeads (10-30% EtOAc/hexane) to give the title compound as a colorless oil (44.0 mg, 86% yield, 14:1 dr, 99% ee).

**Procedure B:** To a 4 mL vial equipped with a magnetic stir bar was added 3-phenyl-but-2-enal (21.0 mg, 0.144 mmol) and di-*tert*-butyl-1,4-dihydro-2,6-dimethylpyridine-3,5-dicarboxylate (53.8 mg, 0.174 mmol). This mixture was dissolved in chloroform (200  $\mu$ L) and cooled to  $-30$   $^{\circ}$ C. After stirring for 10 min, (*2R*)-2-*tert*-butyl-3-methyl-imidazolidin-4-one trichloroacetic acid salt (5.1 mg, 16  $\mu$ mol) was added as a solid and the reaction was allowed to stir for 24 hr. The reaction mixture was then warmed to room temperature and a premixed solution of (*E*)-ethyl 2-(4-methoxyphenylimino)ethanoate (36 mg, 0.174 mmol) and L-proline (5.5 mg, 48  $\mu$ mol) in DMSO (1.5 mL) was added and the resulting mixture was allowed to stir at room temperature for 12 h. A premixed solution (1:1) of saturated  $\text{NH}_4\text{Cl}$  and diethyl ether was added to the reaction with vigorous stirring. The layers were separated and the organic phase was washed with brine. The combined organic phases were dried with  $\text{MgSO}_4$ , concentrated under reduced pressure and purified by chromatography on iatrobeads (10-50% pentane/diethyl ether) to give the title compound as a colorless oil (40.0 mg, 78% yield, 10:1 dr, 99% ee). IR (film) 2989, 2870, 1724,

1513, 1239, 1142,  $\text{cm}^{-1}$ ;  $^1\text{H}$  NMR (500 MHz,  $\text{CDCl}_3$ )  $\delta$  1.25 (dt, 3H,  $J = 4.5, 7.0$  Hz,  $\text{CH}_2\text{CH}_3$ ), 1.36 (d, 3H,  $J = 7.0$  Hz,  $\text{CHCH}_3$ ), 2.99 (m, 1H, ArMeCH), 3.45 (m, 1H,  $\text{CHCHO}$ ), 3.72 (s, 3H, ArOCH<sub>3</sub>), 3.97 (d, 1H,  $J = 4.5$  Hz,  $\text{CHCHN}$ ), 4.09-4.14 (m, 2H), 6.38 (d, 2H,  $J = 9.0$  Hz, ArH), 6.70 (d, 2H,  $J = 9.5$  Hz, ArH), 7.24-7.40 (m, 6H, ArH, NH), 9.83 (d, 1H,  $J = 2.0$  Hz, CHO);  $^{13}\text{C}$  NMR (125 MHz,  $\text{CDCl}_3$ )  $\delta$  14.1, 19.9, 37.5, 55.6, 57.5, 59.7, 61.5, 114.7, 115.7, 127.6, 127.7, 128.8, 139.8, 143.3, 153.3, 171.8, 203.4; HRMS (EI+) exact mass calculated for ( $\text{C}_{21}\text{H}_{25}\text{O}_4\text{N}$ ) requires  $m/z$  355.1784, found  $m/z$  355.1787.  $[\alpha]_D^{23} = -3.60$  ( $c = 2.80$ ,  $\text{CHCl}_3$ ). The diastereomeric ratio was determined by  $^1\text{H}$  NMR analysis of the crude reaction mixture (CHO, major 9.83 ppm minor 9.53 ppm). The enantiomeric ratio was determined by SFC analysis using a Chiralcel OJ-H (25 cm  $\times$  0.46 cm) column (5% to 10% MeOH, linear gradient, 100 bar, 35  $^\circ\text{C}$  oven, flow = 4.0 mL/min);  $t_r = 6.51$  min (major) and 6.96 min (minor).

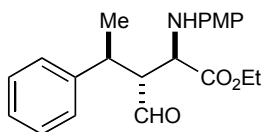

**((2R,3R,4S)-Ethyl-2-(4-methoxyphenylamino)-3-formyl-4-phenylpentanoate:**

**Procedure A:** To a 4 mL vial equipped with a magnetic stir bar was added 3-phenyl-but-2-enal (21.0 mg, 0.144 mmol) and di-*tert*-butyl-1,4-dihydro-2,6-dimethylpyridine-3,5-dicarboxylate (53.8 mg, 0.174 mmol). This mixture was dissolved in chloroform (400  $\mu\text{L}$ ) and cooled to  $-30$   $^\circ\text{C}$ . After stirring for 10 min, the catalysts, (2*R*)-2-*tert*-butyl-3-methyl-imidazolidin-4-one trichloroacetic acid salt (5.1 mg, 16  $\mu\text{mol}$ ) and D-proline (5.5 mg, 48  $\mu\text{mol}$ ) were added and the reaction was allowed to stir for 24 hr. The reaction mixture was then warmed to room temperature and a premixed solution of (*E*)-ethyl 2-(4-methoxyphenylimino)ethanoate (36 mg, 0.174 mmol) in DMSO (1.5 mL) was added and the resulting mixture was allowed to stir at room temperature for 6 h. A premixed solution (1:1) of saturated  $\text{NH}_4\text{Cl}$  and diethyl ether was added to the reaction with vigorous stirring. The layers were separated and the organic phase was washed with brine. The combined organic phases were dried with  $\text{MgSO}_4$ , concentrated under reduced pressure and purified by chromatography on iatrobeads (10-30% EtOAc/hexane) to give the title compound as a colorless oil (41.0 mg, 80% yield, 12:1 dr, 99% ee).

**Procedure B:** To a 4 mL vial equipped with a magnetic stir bar was added 3-phenyl-but-2-enal (21.0 mg, 0.144 mmol), di-*tert*-butyl 1,4-dihydro-2,6-dimethylpyridine-3,5-dicarboxylate (53.8 mg, 0.174 mmol). This mixture was dissolved in chloroform (200  $\mu$ L) and cooled to  $-30$   $^{\circ}$ C. After stirring for 10 min, (2*R*)-2-*tert*-butyl-3-methyl-imidazolidin-4-one trichloroacetic acid salt (5.1 mg, 16  $\mu$ mol) was added as a solid and the reaction was allowed to stir for 24 h. The reaction mixture was then warmed to room temperature and a premixed solution of (*E*)-ethyl 2-(4-methoxyphenylimino)ethanoate (36 mg, 0.174 mmol) and D-proline (5.5 mg, 48  $\mu$ mol) in DMSO (1.5 mL) was added and the resulting mixture was allowed to stir at room temperature for 12 h. A premixed solution (1:1) of saturated  $\text{NH}_4\text{Cl}$  and diethyl ether was added to the reaction with vigorous stirring. The layers were separated and the organic phase was washed with brine. The combined organic phases were dried with  $\text{MgSO}_4$ , concentrated under reduced pressure and purified by chromatography on iatrobeads (10-50% pentane/diethyl ether) to give the title compound as a colorless oil (42.0 mg, 82% yield, 12:1 dr, 99% ee). IR (film) 2989, 2870, 1722, 1513, 1241, 1142,  $\text{cm}^{-1}$ ;  $^1\text{H}$  NMR (500 MHz,  $\text{CDCl}_3$ )  $\delta$  1.22 (dt, 3H,  $J = 0.5, 7.0$  Hz,  $\text{CH}_2\text{CH}_3$ ), 1.48 (d, 3H,  $J = 7.0$  Hz,  $\text{CH}_3$ ), 2.96 (m, 1H, ArCHMe), 3.49 (m, 1H,  $\text{CHCHO}$ ), 3.76 (s, 3H, ArOCH<sub>3</sub>), 4.19-4.14 (q, 2H,  $J = 7.0$  Hz,  $\text{CH}_2\text{CH}_3$ ), 4.29 (d, 1H,  $J = 4.5$  Hz,  $\text{CHCNH}$ ), 6.63 (d, 2H,  $J = 8.5$  Hz, ArH), 6.78 (d, 2H,  $J = 9.0$  Hz, ArH), 7.32-7.18 (m, 6H, ArH, NH), 9.53 (d, 1H,  $J = 2.5$  Hz, CHO);  $^{13}\text{C}$  NMR (125 MHz,  $\text{CDCl}_3$ )  $\delta$  14.1, 19.9, 37.7, 55.6, 57.1, 58.9, 61.5, 114.8, 115.8, 127.2, 127.8, 128.8, 140.1, 142.4, 153.2, 172.5, 202.9; HRMS (EI+) exact mass calculated for ( $\text{C}_{21}\text{H}_{25}\text{O}_4\text{N}$ ) requires  $m/z$  355.1784, found  $m/z$  355.1790.  $[\alpha]_D^{23} = +30.3$  ( $c = 2.37$ ,  $\text{CHCl}_3$ ). The diastereomeric ratio was determined by  $^1\text{H}$  NMR analysis of the crude reaction mixture (CHO, major 9.53 ppm minor 9.83 ppm). The enantiomeric ratio was determined by SFC analysis using a Chiralcel OJ-H (25 cm  $\times$  0.46 cm) column (5% to 10% MeOH, linear gradient, 100 bar, 35  $^{\circ}$ C oven, flow = 4.0 mL/min);  $t_r = 3.41$  min (minor) and 3.66 min (major).

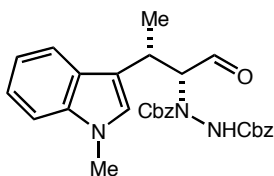

**N-((1*R*,2*S*)-1-Formyl-2-(1-methyl-1*H*-indol-3-yl))-N'-(benzyloxycarbonyl)hydrazine**

**carboxylic acid benzyl ester:** Crotonaldehyde (48 mg, 0.685 mmol), 1-methylindole (30.0 mg,

0.229 mmol) and  $\text{CH}_2\text{Cl}_2$  (500  $\mu\text{L}$ ) were charged into 4 mL vial with magnetic stir bar and cooled to  $-60\text{ }^\circ\text{C}$ . After stirring 15 min at  $-60\text{ }^\circ\text{C}$ , the catalyst (2*S*,5*S*)-2-*tert*-butyl-5-benzyl-3-methylimidazolidin-4-one trifluoroacetic acid salt (8.3 mg, 0.023 mmol) was added in one portion with stirring, and the resulting solution was stirred 12 h at  $-60\text{ }^\circ\text{C}$ , at which point L-proline (5.3 mg, 0.046 mmol) was added, along with a solution of dibenzyl azodicarboxylate (90 wt%, 227 mg, 0.685 mmol) in  $\text{CH}_2\text{Cl}_2$  (500  $\mu\text{L}$ ), and the reaction mixture was allowed to warm to  $0\text{ }^\circ\text{C}$ . The reaction mixture was stirred further 24 h at  $0\text{ }^\circ\text{C}$ , and then quickly filtered through an iatrobead pad to stop the reaction. The crude mixture was concentrated by rotary evaporation and then purified quickly (<15 min to avoid partial epimerization at  $\alpha$ -amino stereocenter) by flash column chromatography with iatrobeads as the stationary phase (20-30% EtOAc/hexanes) to yield the title compound as a white solid (107 mg, 94% yield, 14:1 dr, 99% ee). IR (film) 1710, 1454, 1283, 1212, 1051  $\text{cm}^{-1}$ ;  $^1\text{H}$  NMR (400 MHz,  $\text{CDCl}_3$ )  $\delta$  1.38-1.78 (m, 3H,  $\text{CHCH}_3$ ), 3.56-3.64 (m, 1H, ArMeCH), 3.78 (s, 3H,  $\text{NCH}_3$ ), 4.71-4.94 (m, 1H,  $\text{NCHCHO}$ ), 4.95-5.28 (m, 4H,  $\text{PhCH}_2$ ), 6.20-6.83 (m, 1H, NH), 6.87-7.68 (m, 15H, ArH), 9.28 (bs, 1H, CHO);  $^{13}\text{C}$  NMR (100 MHz,  $\text{CDCl}_3$ )  $\delta$  20.1, 29.8, 32.7, 67.7, 68.5, 71.8, 109.5, 114.7, 118.9, 119.3, 121.9, 126.5, 127.6, 128.0, 128.1, 128.4, 128.5, 128.5, 135.2, 135.4, 137.1, 155.9, 156.7, 200.9 (additional peaks and line broadenings are observed due to rotameric species); HRMS (EI+) exact mass calculated for ( $\text{C}_{29}\text{H}_{29}\text{N}_3\text{O}_5$ ) requires  $m/z$  499.2107, found  $m/z$  499.2094;  $[\alpha]_D^{23} = -19.2$  ( $c = 0.100$ ,  $\text{CHCl}_3$ ) The diastereomeric ratio was determined by  $^1\text{H}$  NMR analysis of the crude reaction mixture (CHO major 9.28 ppm, minor 9.93 ppm). The enantiomeric ratio was determined by SFC analysis of the corresponding alcohol (following  $\text{NaBH}_4$  reduction) using a Chiralcel AS-H (25 cm  $\times$  0.46 cm) column (5% to 25% MeOH, linear gradient, 100 bar,  $35\text{ }^\circ\text{C}$  oven, flow = 4.0 mL/min);  $t_r = 8.55$  min (minor) and 10.36 min (major).

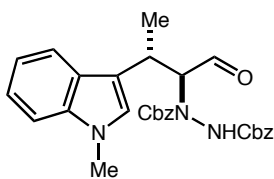

***N*-((1*S*,2*S*)-1-Formyl-2-(1-methyl-1*H*-indol-3-yl))-*N'*-(benzyloxycarbonyl)hydrazine**

**carboxylic acid benzyl ester:** Crotonaldehyde (48 mg, 0.685 mmol), 1-methylindole (30.0 mg,

0.229 mmol) and CH<sub>2</sub>Cl<sub>2</sub> (500 μL) were charged into 4 mL vial with magnetic stir bar and cooled to -60 °C. After stirring 15 min at -60 °C, the catalyst (2*S*,5*S*)-2-*tert*-butyl-5-benzyl-3-methylimidazolidin-4-one trifluoroacetic acid salt (8.3 mg, 0.023 mmol) was added in one portion with stirring, and the resulting solution was stirred 12 h at -60 °C, at which point D-proline (5.3 mg, 0.046 mmol) was added, along with a solution of dibenzyl azodicarboxylate (90 wt%, 227 mg, 0.685 mmol) in CH<sub>2</sub>Cl<sub>2</sub> (500 μL) and the reaction mixture was allowed to warm to 0 °C. The reaction mixture was stirred further 24 h at 0 °C, and then quickly filtered through an iatrobead pad. The crude mixture was concentrated by rotary evaporation and then purified quickly (<15 min to avoid partial epimerization at α-amino stereocenter) by flash column chromatography with Davisil as the stationary phase (20-30% EtOAc/hexanes) to yield the title compound as a white solid (97.0 mg, 85% yield, 7:1 dr, 99% ee). IR (film) 1712, 1497, 1454, 1213, 1051, 909 cm<sup>-1</sup>; <sup>1</sup>H NMR (300 MHz, CDCl<sub>3</sub>) δ 1.35-1.58 (m, 3H, CHCH<sub>3</sub>), 3.60-3.86 (m, 4H NCH<sub>3</sub>, ArMeCH), 4.75-4.90 (m, 1H, NCHCHO), 4.95-5.28 (m, 4H, PhCH<sub>2</sub>), 6.20-6.60 (m, 1H, NH), 6.81-7.65 (m, 16H, ArH), 9.93 (bs, 1H, CHO); <sup>13</sup>C NMR (100 MHz, CDCl<sub>3</sub>) δ 19.2, 28.4, 32.6, 67.7, 68.3, 71.7, 109.5, 115.6, 118.9, 119.2, 121.9, 126.1, 126.5, 127.6, 128.0, 128.1, 128.4, 128.5, 135.3, 135.5, 137.1, 155.7, 155.9, 198.0 (additional peaks and line broadenings are observed due to rotameric species); HRMS (EI) exact mass calculated for (C<sub>29</sub>H<sub>29</sub>N<sub>3</sub>O<sub>5</sub>) requires *m/z* 499.2107, found *m/z* 499.2092. [α]<sub>D</sub><sup>23</sup> = -31.5 (c = 0.100, CHCl<sub>3</sub>). The diastereomeric ratio was determined by <sup>1</sup>H NMR analysis of the crude reaction mixture (CHO major 9.93 ppm, minor 9.28 ppm). The enantiomeric ratio was determined by SFC analysis of the corresponding alcohol following NaBH<sub>4</sub> reduction using a Chiralcel AS-H (25 cm × 0.46 cm) column (5% to 25% MeOH, linear gradient, 100 bar, 35 °C oven, flow = 4.0 mL/min); *t*<sub>r</sub> = 8.87 min (minor) and 9.23 min (major).

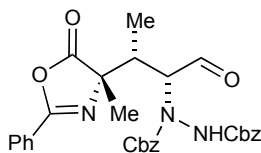

***N*-((1*R*,2*R*)-1-Formyl-2-((*R*)-4,5-dihydro-4-methyl-5-oxo-2-phenyloxazol-4-yl)-*N*'-**

**(benzyloxycarbonyl)hydrazinecarboxylic acid benzyl ester:** Crotonaldehyde (31.0 μL, 0.375 mmol), 4-methyl-2-phenyl-5-triisopropylsilanoxy-oxazole (41.5 mg, 0.125 mmol) water (4.5 μL, 0.250 mmol), and MeCN (250 μL) were charged into 4 mL vial with magnetic stir bar and cooled

to  $-40\text{ }^{\circ}\text{C}$ . After stirring 15 min at  $-40\text{ }^{\circ}\text{C}$ , the catalyst (*2S,5S*)-2-*tert*-butyl-5-benzyl-3-methylimidazolidin-4-one trichloroacetic acid salt (5.3 mg, 0.013 mmol) was added in one portion with stirring, and the resulting solution was stirred 12 h at  $-40\text{ }^{\circ}\text{C}$ , at which point L-proline (3.0 mg, 0.026 mmol) was added, followed by a solution of dibenzyl azodicarboxylate (90 wt%, 124 mg, 0.375 mmol) in MeCN (700  $\mu\text{L}$ ), and the reaction mixture was allowed to warm to  $-15\text{ }^{\circ}\text{C}$ . The reaction mixture was stirred further 10 h at  $-15\text{ }^{\circ}\text{C}$ , and then quickly purified by preparatory TLC as the stationary phase (20% EtOAc/hexanes) to yield the title compound as a colorless semi-solid (52.0 mg, 77% yield, 5:1 dr, 99% ee). IR (film) 1721, 1651, 1389, 1283, 1218, 1004  $\text{cm}^{-1}$ ;  $^1\text{H}$  NMR (500 MHz,  $\text{CDCl}_3$ )  $\delta$  0.71-1.26 (m, 3H,  $\text{CHCH}_3$ ), 1.42-1.81 (m, 3H,  $\text{CNCH}_3$ ), 2.92-3.15 (m, 1H, ArMeCH), 4.37-4.61 (m, 1H, NCHCHO), 4.95-5.30 (m, 4H,  $\text{PhCH}_2$ ), 6.55-6.89 (m, 1H, NH), 7.18-8.10 (m, 15H, ArH), 9.82-9.92 (m, 1H, CHO);  $^{13}\text{C}$  NMR (100 MHz,  $\text{CDCl}_3$ )  $\delta$  10.9, 21.8, 40.2, 67.9, 68.6, 69.6, 70.8, 127.9, 128.0, 128.2, 128.4, 128.5, 128.7, 128.8, 128.9, 133.2, 133.4, 135.2, 135.5, 151.8, 156.2, 161.3, 179.7, 200.7 (additional peaks and line broadenings are observed due to rotameric species); HRMS (ESI) calculated for ( $\text{C}_{30}\text{H}_{30}\text{N}_3\text{O}_7+\text{H}$ ) requires  $m/z$  544.2084, found  $m/z$  544.2079;  $[\alpha]_D^{23} = +19.9$  ( $c = 2.30$ ,  $\text{CHCl}_3$ ). The diastereomeric ratio was determined by  $^1\text{H}$  NMR analysis of the crude reaction mixture (CHO major 9.82-9.92 ppm, minor 9.66-9.81 ppm). The enantiomeric ratio was determined by SFC analysis using a Chiralcel AD-H (25 cm  $\times$  0.46 cm) column (5% to 10% MeCN, linear gradient, 100 bar,  $35\text{ }^{\circ}\text{C}$  oven, flow = 4.0 mL/min);  $t_r = 7.52$  min (major) and 8.14 min (minor).

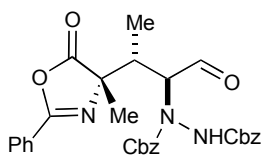

***N*-((1*S*,2*R*)-1-Formyl-2-((*R*)-4,5-dihydro-4-methyl-5-oxo-2-phenyloxazol-4-yl))-*N*'-**

**(benzyloxycarbonyl)hydrazinecarboxylic acid benzyl ester:** Crotonaldehyde (31.0  $\mu\text{L}$ , 0.375 mmol), 4-methyl-2-phenyl-5-triisopropylsilyloxy-oxazole (41.5 mg, 0.125 mmol), water (4.5  $\mu\text{L}$ , 0.250 mmol), and MeCN (250  $\mu\text{L}$ ) were charged into 4 mL vial with magnetic stir bar and cooled to  $-40\text{ }^{\circ}\text{C}$ . After stirring 15 min at  $-40\text{ }^{\circ}\text{C}$ , the catalyst (*2S,5S*)-2-*tert*-butyl-5-benzyl-3-methylimidazolidin-4-one trichloroacetic acid salt (5.3 mg, 0.013 mmol) was added in one portion with stirring, and the resulting solution was stirred 12 h at  $-40\text{ }^{\circ}\text{C}$ , at which point D-

proline (3.0 mg, 0.026 mmol) was added, along with a solution of dibenzyl azodicarboxylate (90 wt%, 124 mg, 0.375 mmol) in MeCN (700  $\mu$ L), and the reaction mixture was allowed to warm to  $-15$   $^{\circ}$ C. The reaction mixture was stirred further 14 h at  $-15$   $^{\circ}$ C, and then quickly purified by preparatory TLC as the stationary phase (20% EtOAc/hexanes) to yield the title compound as a colorless semi-solid (57.0 mg, 84% yield, 13:1 dr, 99% ee). IR (film) 1721, 1648, 1389, 1221, 1029, 679  $\text{cm}^{-1}$ ;  $^1\text{H}$  NMR (500 MHz,  $\text{CDCl}_3$ )  $\delta$  0.82-1.21 (m, 3H,  $\text{CHCH}_3$ ), 1.43-1.79 (m, 3H,  $\text{CNCH}_3$ ), 2.90-3.10 (m, 1H, ArMeCH), 4.40-4.52 (m, 1H,  $\text{NCHCHO}$ ), 4.95-5.30 (m, 4H,  $\text{PhCH}_2$ ), 6.80-6.95 (m, 1H, NH), 7.18-8.09 (m, 15H, ArH), 9.66-9.81 (m, 1H, CHO);  $^{13}\text{C}$  NMR (100 MHz,  $\text{CDCl}_3$ )  $\delta$  13.5, 22.6, 40.2, 67.9, 68.6, 69.5, 70.9, 127.9, 128.1, 128.3, 128.5, 128.6, 128.8, 128.9, 129.2, 133.1, 134.6, 135.2, 135.4, 155.7, 156.2, 161.1, 178.8, 200.5 (additional peaks and line broadenings are observed due to rotameric species); HRMS (ESI) calculated for ( $\text{C}_{30}\text{H}_{30}\text{N}_3\text{O}_7 + \text{H}$ ) requires  $m/z$  544.2084, found  $m/z$  544.2079.  $[\alpha]_D^{23} = +2.3$  ( $c = 1.55$ ,  $\text{CHCl}_3$ ). The diastereomeric ratio was determined by  $^1\text{H}$  NMR analysis of the crude reaction mixture (CHO major 9.66-9.81 ppm, minor 9.82-9.92 ppm). The enantiomeric ratio was determined by SFC analysis using a Chiralcel AS-H (25 cm  $\times$  0.46 cm) column (5% to 25% MeCN, linear gradient, 100 bar, 35  $^{\circ}$ C oven, flow = 4.0 mL/min);  $t_r = 6.86$  min (major) and 7.97 min (minor).

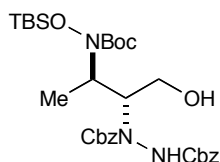

***N*-((*2R,3R*)-*tert*-Butyl-(*tert*-butyldimethylsilyloxy)-3-amino-4-hydroxybutan-2-ylcarbamoyl)-*N'*-(benzyloxycarbonyl)hydrazine carboxylic acid benzyl ester:** Crotonaldehyde (50.0  $\mu$ L, 0.603 mmol), *tert*-butyl-(*tert*-butyldimethylsilyloxy)carbamate (50.0 mg, 0.201 mmol) and  $\text{CHCl}_3$  (100  $\mu$ L) were charged into 4 mL vial with magnetic stir bar and cooled to  $-20$   $^{\circ}$ C. After stirring 15 min at  $-20$   $^{\circ}$ C, the catalyst (*2S,5S*)-2-*tert*-butyl-5-benzyl-3-methylimidazolidin-4-one trifluoroacetic acid salt (7.5 mg, 0.020 mmol) was added in one portion with stirring, and the resulting solution was stirred 48 h at  $-20$   $^{\circ}$ C, at which point L-proline (4.6 mg, 0.040 mmol) was added, followed by a solution of water (11.0  $\mu$ L, 0.603 mmol) and dibenzyl azodicarboxylate (90 wt%, 200 mg, 0.603 mmol) in MeCN (1.5 mL). The reaction was allowed to warm to  $-10$   $^{\circ}$ C, and was stirred an additional 8 h at  $-10$   $^{\circ}$ C, before being transferred to a solution of  $\text{NaBH}_4$  (68

mg, 1.8 mmol.) in ethanol (1.0 mL) pre-cooled to  $-20\text{ }^{\circ}\text{C}$ , the resulting solution was allowed to stir for 30 min at  $-20\text{ }^{\circ}\text{C}$  and then warm to room temperature. Excess  $\text{NaBH}_4$  was quenched with addition of half-saturated ammonium chloride at  $-20\text{ }^{\circ}\text{C}$  and then solution allowed to warm to room temperature and extracted with EtOAc, dried with  $\text{MgSO}_4$  and concentrated under reduced pressure. The crude mixture was concentrated by rotary evaporation and then purified by flash column chromatography with iatrobeads as the stationary phase (20% EtOAc/hexanes) to yield the title compound as a colorless semi-crystalline solid (103 mg, 84% yield, 7:1 dr, 99% ee). IR (film) 2931, 1721, 1255, 909  $\text{cm}^{-1}$ ;  $^1\text{H}$  NMR (400 MHz,  $65\text{ }^{\circ}\text{C}$ ,  $\text{CDCl}_3$ )  $\delta$  8.013-0.22 (m, 6H,  $\text{SiCH}_3$ ), 0.90-1.00 (m, 9H,  $\text{SiC}(\text{CH}_3)_3$ ), 1.17-1.35 (m, 4H,  $\text{COH}$ ,  $\text{NCHCH}_3$ ), 1.42-1.52 (m, 9H,  $\text{OC}(\text{CH}_3)_3$ ), 3.58-3.92 (m, 3H,  $\text{CH}_2\text{OH}$ ,  $\text{NCH}$ ), 4.58-4.70 (m, 1H,  $\text{NCH}$ ), 5.10-5.30 (m, 4H,  $\text{PhCH}_2$ ), 6.45-6.95 (m, 1H,  $\text{NH}$ ), 7.25-7.43 (m, 10H,  $\text{ArH}$ );  $^{13}\text{C}$  NMR (100 MHz,  $\text{CDCl}_3$ )  $\delta$  -4.4, 15.3, 18.0, 25.9, 28.2, 58.1, 59.7, 64.0, 68.2, 68.9, 82.2, 128.2, 128.2, 128.4, 128.5, 128.6, 128.7, 135.2, 135.4, 155.0, 155.9, 156.8 (additional peaks and line broadenings are observed due to rotameric species); HRMS (ESI) exact mass calculated for  $(\text{C}_{31}\text{H}_{48}\text{N}_3\text{O}_8\text{Si}+\text{H})$  requires  $m/z$  618.3211, found  $m/z$  618.3209.  $[\alpha]_D^{23} = -5.6$  ( $c = 0.950$ ,  $\text{CHCl}_3$ ). The diastereomeric ratio was determined by  $^1\text{H}$  NMR of the crude reaction mixture before  $\text{NaBH}_4$  reduction ( $\text{CHO}$  major 9.60-9.69 ppm, minor 9.75-9.81 ppm). The enantiomeric ratio was determined by SFC analysis of the alcohol using a Chiralcel OJ-H (25 cm  $\times$  0.46 cm) column (5-10% MeOH, 100 bar,  $35\text{ }^{\circ}\text{C}$  oven, flow = 4.0 mL/min);  $t_r = 2.31$  min (major) and 2.95 min (minor).

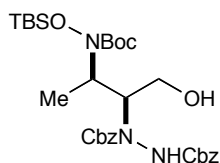

***N*-((*2R,3S*)-*tert*-Butyl-(*tert*-butyldimethylsilyloxy)-3-amino-4-hydroxybutan-2-ylcarbamoyl)-*N'*-(benzyloxycarbonyl)hydrazine carboxylic acid benzyl ester:** Crotonaldehyde (50.0  $\mu\text{L}$ , 0.603 mmol), *tert*-butyl-(*tert*-butyldimethylsilyloxy)carbamate (50.0 mg, 0.201 mmol) and  $\text{CHCl}_3$  (100  $\mu\text{L}$ ) were charged into 4 mL vial with magnetic stir bar and cooled to  $-20\text{ }^{\circ}\text{C}$ . After stirring 15 min at  $-20\text{ }^{\circ}\text{C}$ , the catalyst (*2S,5S*)-2-*tert*-butyl-5-benzyl-3-methylimidazolidin-4-one trifluoroacetic acid salt (7.5 mg, 0.020 mmol) was added in one portion with stirring, and the resulting solution was stirred 48 h at  $-20\text{ }^{\circ}\text{C}$ , at which point D-proline (4.6 mg, 0.040 mmol) was



added, followed by a solution of water (11.0  $\mu\text{L}$ , 0.603 mmol) and dibenzyl azodicarboxylate (90 wt%, 200 mg, 0.603 mmol) in MeCN (1.5 mL). The reaction mixture was allowed to warm to  $-10\text{ }^{\circ}\text{C}$ . and was stirred an additional 8 h at  $-10\text{ }^{\circ}\text{C}$ , before being transferred to solution of  $\text{NaBH}_4$  (68 mg, 1.8 mmol.) in ethanol (1.0 mL) pre-cooled to  $-20\text{ }^{\circ}\text{C}$ , the resulting solution allowed to stir for 30 min at  $-20\text{ }^{\circ}\text{C}$  and then warm to room temperature. Excess  $\text{NaBH}_4$  was quenched with addition of half-saturated ammonium chloride at  $-20\text{ }^{\circ}\text{C}$  and then solution allowed to warm to room temperature and extracted with EtOAc, dried with  $\text{MgSO}_4$  and concentrated under reduced pressure. The crude mixture was concentrated by rotary evaporation and then purified by flash column chromatography with iatrobeads as the stationary phase (20% EtOAc/hexanes) to yield the title compound as a colorless semi-crystalline solid (107 mg, 87% yield, 8:1 dr, 99% ee). IR (film) 2931, 1730, 1257, 840  $\text{cm}^{-1}$ ;  $^1\text{H}$  NMR (400 MHz,  $65\text{ }^{\circ}\text{C}$ ,  $\text{CDCl}_3$ )  $\delta$  0.12-0.22 (m, 6H,  $\text{SiCH}_3$ ), 0.85-0.99 (m, 9H,  $\text{SiC}(\text{CH}_3)_3$ ), 1.17-1.32 (m, 4H,  $\text{COH}$ ,  $\text{NCHCH}_3$ ), 1.39-1.50 (m, 9H,  $\text{OC}(\text{CH}_3)_3$ ), 3.40-3.85 (m, 2H,  $\text{CH}_2\text{OH}$ ), 3.91-4.10 (s, 1H,  $\text{NCH}$ ), 4.60-4.78 (m, 1H,  $\text{NCH}$ ), 5.10-5.30 (m, 4H,  $\text{PhCH}_2$ ), 7.15-7.22 (m, 1H,  $\text{NH}$ ), 7.25-7.43 (m, 10H,  $\text{ArH}$ );  $^{13}\text{C}$  NMR (100 MHz,  $\text{CDCl}_3$ )  $\delta$   $-4.3$ , 18.0, 19.0, 25.9, 28.2, 59.5, 60.3, 60.6, 68.1, 68.3, 82.4, 127.7, 127.8, 127.9, 128.1, 128.5, 128.6, 135.3, 135.9, 155.5, 158.1, 158.4 (additional peaks and line broadenings are observed due to rotameric species); HRMS (ESI) exact mass calculated for  $(\text{C}_{31}\text{H}_{48}\text{N}_3\text{O}_8\text{Si} + \text{H})$  requires  $m/z$  618.3211, found  $m/z$  618.3211.  $[\alpha]_D^{23} = -10.3$  ( $c = 0.730$ ,  $\text{CHCl}_3$ ) The diastereomeric ratio was determined by  $^1\text{H}$  NMR of the crude reaction mixture before  $\text{NaBH}_4$  reduction ( $\text{CHO}$  minor 9.60-9.69 ppm, major 9.75-9.81 ppm). The enantiomeric ratio was determined by SFC analysis using a Chiralcel OJ-H (25 cm  $\times$  0.46 cm) column (5% MeCN, 100 bar,  $35\text{ }^{\circ}\text{C}$  oven, flow = 4.0 mL/min);  $t_r = 2.75$  min (minor) and 3.21 min (major).

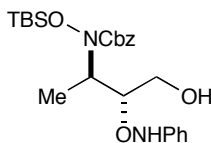

**(2R,3R)-Benzyl-(tert-butyldimethylsilyloxy)-3-(N-phenyl-aminooxy)-4-hydroxybutan-2-**

**yl carbamate:** Crotonaldehyde (10.0  $\mu\text{L}$ , 0.118 mmol), benzyl-(tert-butyldimethylsilyloxy)carbamate (50.0 mg, 0.177 mmol) and  $\text{CHCl}_3$  (180  $\mu\text{L}$ ) were charged into 4 mL vial with magnetic stir bar and cooled to  $-20\text{ }^{\circ}\text{C}$ . After stirring 15 min at  $-20\text{ }^{\circ}\text{C}$ , the

catalyst (2*S*,5*S*)-2-*tert*-butyl-5-benzyl-3-methylimidazolidin-4-one trifluoroacetic acid salt (4.3 mg, 0.012 mmol) was added in one portion with stirring, and the resulting solution was stirred 48 h at  $-20\text{ }^{\circ}\text{C}$ , at which point DMSO (600  $\mu\text{L}$ ) and  $\text{NaHCO}_3$  (5.0 mg, 0.060 mmol) were added and the solution was stirred vigorously and allowed to warm to room temperature over 30 min. L-proline (4.1 mg, 0.036 mmol) and nitrosobenzene (10.1 mg, 0.094 mmol) were added together in one portion, and the reaction mixture was stirred further 30 min at room temperature, and then ethanol (1.0 mL) was added followed by an excess of  $\text{NaBH}_4$  (18 mg, 0.48 mmol). After stirring 30 min at room temperature, the reaction was quenched with saturated  $\text{NH}_4\text{Cl}$  solution and extracted with EtOAc ( $3 \times 1\text{ mL}$ ) then dried over  $\text{Na}_2\text{SO}_4$ . The crude mixture was concentrated by rotary evaporation and then purified by preparatory TLC (30% EtOAc/hexanes) to yield the title compound as a slightly yellow semi-crystalline solid (32.0 mg, 74% yield, 17:1 dr, 99% ee). Note: yield can vary depending on the extent of NO bond cleavage during reductive workup. IR (film) 2929, 1706, 1463, 1253, 1062, 835  $\text{cm}^{-1}$ ;  $^1\text{H}$  NMR (500 MHz,  $\text{CDCl}_3$ )  $\delta$  0.11 (s, 3H,  $\text{SiCH}_3$ ), 0.15 (s, 3H,  $\text{SiCH}_3$ ), 0.92 (s, 9H,  $\text{SiC}(\text{CH}_3)_3$ ), 1.38 (d, 3H,  $J = 7.0\text{ Hz}$ ,  $\text{NCHCH}_3$ ), 2.64 (bs, 1H, OH), 3.85 (dd, 1H,  $J = 5.3, 13\text{ Hz}$ ,  $\text{CHHOH}$ ), 3.93 (d, 1H,  $J = 13\text{ Hz}$ ,  $\text{CHHOH}$ ), 3.99 (m, 1H,  $\text{CHOH}$ ), 4.48 (dq, 1H,  $J = J = 7.0\text{ Hz}$ , NCH), 5.17 (s, 2H,  $\text{PhCH}_2$ ), 6.95 (m, 2H, ArH), 7.23-7.42 (m, 9H, ArH, ArNH);  $^{13}\text{C}$  NMR (100 MHz,  $\text{CDCl}_3$ )  $\delta$  -4.6, -4.3, 15.3, 18.2, 25.8, 56.3, 61.1, 68.3, 86.4, 114.5, 122.2, 128.4, 128.5, 128.7, 128.9, 135.4, 148.3, 159.5; HRMS (ESI) exact mass calculated for ( $\text{C}_{24}\text{H}_{36}\text{N}_2\text{O}_5\text{Si}+\text{H}$ ) requires  $m/z$  461.2472, found  $m/z$  461.2476.  $[\alpha]_D^{23} = +0.89$  ( $c = 0.600$ ,  $\text{CHCl}_3$ ). The diastereomeric ratio was determined by  $^1\text{H}$  NMR of the crude reaction mixture after  $\text{NaBH}_4$  reductive workup (NCH major dq, 4.48 ppm, minor m, 4.60-4.62 ppm). The enantiomeric ratio was determined by SFC analysis using a Chiralcel AD-H (25 cm  $\times$  0.46 cm) column (5% to 10% MeOH, linear gradient, 100 bar,  $35\text{ }^{\circ}\text{C}$  oven, flow = 4.0 mL/min);  $t_r = 5.78\text{ min}$  (minor) and 6.56 min (major).

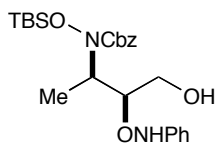

**(2*R*,3*S*)-Benzyl-(*tert*-butyldimethylsilyloxy)-3-(*N*-phenyl-aminooxy)-4-hydroxybutan-2-yl carbamate:** Crotonaldehyde (10.0  $\mu\text{L}$ , 0.118 mmol), benzyl-(*tert*-

butyldimethylsilyloxy)carbamate (50.0 mg, 0.177 mmol) and  $\text{CHCl}_3$  (180  $\mu\text{L}$ ) were charged into 4 mL vial with magnetic stir bar and cooled to  $-20\text{ }^\circ\text{C}$ . After stirring 15 min at  $-20\text{ }^\circ\text{C}$ , the catalyst (2*S*,5*S*)-2-*tert*-butyl-5-benzyl-3-methylimidazolidin-4-one trifluoroacetic acid salt (4.3 mg, 0.012 mmol) was added in one portion with stirring, and the resulting solution was stirred 48 h at  $-20\text{ }^\circ\text{C}$ , at which point DMSO (600  $\mu\text{L}$ ) and  $\text{NaHCO}_3$  (5.0 mg, 0.060 mmol) were added and the solution was stirred vigorously and allowed to warm to room temperature over 30 min. D-proline (4.1 mg, 0.036 mmol) and nitrosobenzene (10.1 mg, 0.094 mmol) were added together in one portion, and the reaction mixture was stirred further 30 min at room temperature, and then ethanol (1.0 mL) was added followed by an excess of  $\text{NaBH}_4$  (18 mg, 0.48 mmol). After stirring 30 min at room temperature, the reaction was quenched with saturated  $\text{NH}_4\text{Cl}$  solution and extracted with EtOAc (3  $\times$  1 mL) then dried over  $\text{Na}_2\text{SO}_4$ . The crude mixture was concentrated by rotary evaporation and then purified by preparatory TLC (30% EtOAc/hexanes) to yield the title compound as a slightly yellow semi-crystalline solid (31.0 mg, 71% yield, 14:1 dr, 99% ee). Note: yield can vary depending on the extent of NO bond cleavage during reductive workup. IR (film) 2952, 1709, 1471, 1301, 1252, 1062, 835  $\text{cm}^{-1}$ ;  $^1\text{H}$  NMR (500 MHz,  $\text{CDCl}_3$ )  $\delta$  0.13 (s, 3H,  $\text{SiCH}_3$ ), 0.16 (s, 3H,  $\text{SiCH}_3$ ), 0.94 (s, 9H,  $\text{SiC}(\text{CH}_3)_3$ ), 1.32 (d, 3H,  $J = 7.0$  Hz,  $\text{NCHCH}_3$ ), 2.95 (bs, H, OH), 3.79 (m, 1H,  $\text{CHOH}$ ), 4.10-4.14 (m, 1H,  $\text{CHHOH}$ ), 4.18 (d, 1H,  $J = 13$  Hz,  $\text{CHHOH}$ ), 4.60-4.62 (m, 1H, NCH), 5.07-5.15 (m, 2H,  $\text{PhCH}_2$ ), 6.96-7.01 (m, 2H, ArH), 7.13-7.31 (m, 8H, ArH), 7.42 (s, 1H, ArNH);  $^{13}\text{C}$  NMR (100 MHz,  $\text{CDCl}_3$ )  $\delta$  -4.4, -4.0, 15.5, 18.4, 25.9, 56.6, 63.5, 68.0, 81.4, 114.8, 122.7, 128.2, 128.3, 128.3, 128.9, 135.6, 147.8, 160.7; HRMS (ESI) exact mass for ( $\text{C}_{24}\text{H}_{36}\text{N}_2\text{O}_5\text{Si} + \text{H}$ ) requires  $m/z$  461.2472, found  $m/z$  461.2476.  $[\alpha]_D^{23} = -19.4$  ( $c = 1.15$ ,  $\text{CHCl}_3$ ). The diastereomeric ratio was determined by  $^1\text{H}$  NMR of the crude reaction mixture after  $\text{NaBH}_4$  reductive workup (CHN minor dq, 4.48 ppm, major m, 4.60-4.62 ppm). The enantiomeric ratio was determined by SFC analysis using a Chiralcel AD-H (25 cm  $\times$  0.46 cm) column (5% to 10% MeOH, linear gradient, 100 bar,  $35\text{ }^\circ\text{C}$  oven, flow = 4.0 mL/min);  $t_r = 3.94$  min (minor) and 7.10 min (major).

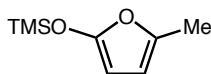

**(5-Methylfuran-2-yloxy)trimethylsilane (6):**  $\alpha$ -Angelica lactone (9.81 g, 100 mmol), dry Et<sub>2</sub>O (50.0 mL), and Et<sub>3</sub>N (14.4 ml, 103 mmol) were charged into a dry 250 mL round-bottom flask with magnetic stir bar under argon. Contents of flask were cooled to 0 °C. Freshly distilled TMSCl (15.2 mL 102 mmol) was added slowly with stirring, and the resulting solution was allowed to stir overnight gradually warming to ambient temperature. The reaction mixture was filtered, and the solids were washed with dry Et<sub>2</sub>O. Filtrate was then concentrated by rotary evaporation and then distilled (44-43 °C, 4 mm Hg) to afford the title compound as a colorless oil (14.8 g, 95% yield). All physical and spectral<sup>6</sup> properties were consistent with reported literature values.

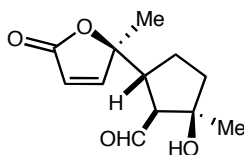

**(1S,2R,5R)-5-((R)-2,5-Dihydro-2-methyl-5-oxofuran-2-yl)-2-hydroxy-2-methylcyclopentane carbaldehyde (4):** 5-Hexen-2-one (250 mg, 2.54 mmol), *E*-crotonaldehyde (267 mg, 3.81 mmol) and CH<sub>2</sub>Cl<sub>2</sub> (2.50 mL) were charged into dry 10 mL round-bottom flask equipped with nitrogen inlet, magnetic stirbar and reflux condenser. The solvent was degassed by bubbling a stream of argon into flask for 15 min. Second generation Grubbs catalyst was added (11 mg, 0.013 mmol) and contents of flask heated to 40 °C. After five min stirring at 40 °C, evolution of gas was observed. When evolution of gas had ceased, reflux condenser was removed and contents of flask heated at 35 °C an additional 2 h with nitrogen sweep while flask was vented to open atmosphere (to remove excess crotonaldehyde). Contents of flask were cooled to -50 °C. After five min (2*S*,5*S*)-2-*tert*-butyl-5-benzyl-3-methylimidazolidin-4-one 2-4-dinitrobenzoic acid salt (91.6 mg, 0.200 mmol) was added in one portion as a solution in CH<sub>2</sub>Cl<sub>2</sub> (2.00 mL), followed by water (36.0  $\mu$ L, 2.02 mmol). The resulting solution was stirred another five min at -50 °C at which point (5-methylfuran-2-yloxy)trimethylsilane **6** (158 mg, 1.01 mmol) was added in three equal portions over 12 h. The reaction mixture was further stirred 12 h at -50 °C, and then L-proline (34.5 mg, 0.300 mmol) was added along with EtOAc (4.00 mL). The reaction was allowed to warm to ambient temperature and stirred for 24 h until reaction complete by TLC. The entire reaction mixture was concentrated by rotary evaporation and then purified by flash

column chromatography (50-90% Et<sub>2</sub>O/pentane) to yield the title compound as a colorless oil (145 mg, 64% yield, 5:1 dr, 95% ee). IR (film) 3463, 2968, 1737, 1720, 1379, 1264, 1109, 951 cm<sup>-1</sup>; <sup>1</sup>H NMR (400 MHz, CDCl<sub>3</sub>) δ 1.28-38 (m, 1H, CHHCH<sub>2</sub>), 1.40 (s, 3H, CH<sub>3</sub>), 1.52 (s, 3H, CH<sub>3</sub>), 1.68-1.75 (m, 2H, CHHCH<sub>2</sub>), 1.89 (bs, 1H, OH), 1.90-2.05 (m, 1H, CHHCH<sub>2</sub>), 2.61 (dd, *J* = 2.0, 8.4 Hz, 1H, CHCH), 3.10 (ddd, *J* = 10.2, 8.8, 5.2 Hz, 1H, CHCH), 6.11 (d, *J* = 6.0 Hz, 1H, CH=CH), 7.36 (dd, *J* = 2.0, 6.0 Hz, 1H, CH=CH), 9.86 (d, *J* = 2.0 Hz, 1H, CHO); <sup>13</sup>C NMR (100 MHz, CDCl<sub>3</sub>) δ 23.4, 24.3, 27.3, 41.2, 44.3, 61.8, 82.5, 90.1, 121.8, 158.9, 172.2, 203.2; HRMS (EI) exact mass calculated for (C<sub>12</sub>H<sub>16</sub>O<sub>4</sub>) requires *m/z* 224.1049, found *m/z* 224.1051.  $[\alpha]_D^{23} = -12.4$  (*c* = 0.094, CHCl<sub>3</sub>). The diastereomeric ratio was determined by <sup>1</sup>H NMR analysis of the crude reaction mixture (CHO major = d, 9.86 ppm; CHO minor = d, 9.81 ppm). The enantiomeric ratio was determined by chiral GLC of crude reaction mixture prior to the addition of L-proline (Varian CP-Chirasil Dex-CB 130 °C isotherm 7 min, then 0.7 °C/min to 180 °C) relative to a racemic sample where *t<sub>r</sub>* = 57.9 min (minor) and *t<sub>r</sub>* = 59.1 min (major).

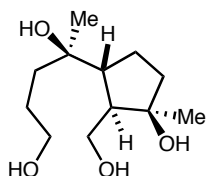

**(1R,2R,3R)-2-(Hydroxymethyl)-3-((R)-2,5-dihydroxypentan-2-yl)-1-methylcyclopentanol:**

Butenolide **4** (600 mg, 2.67 mmol) was charged into a dry 25 mL flask along with reagent grade ethanol (10 mL) and 5% Pd/C (600 mg, 100 wt%, Engelhard code 3645). The flask was then gas evacuated and purged with hydrogen gas (~1 atm) and the resulting solution was stirred for 12 h at room temperature. The reaction mixture was directly filtered over Florisil to remove Pd/C and the filtrate was concentrated and purified by passing it through a silica gel plug (100% Et<sub>2</sub>O) to remove baseline impurities. Upon concentration, the corresponding butanolide ((1*S*,2*R*,5*R*)-5-((*R*)-tetrahydro-2-methyl-5-oxofuran-2-yl)-2-hydroxy-2-methylcyclopentane carbaldehyde) was obtained as a pure white solid (589 mg, 97% yield). IR (film) 3464, 2970, 1758, 1715, 937 cm<sup>-1</sup>; <sup>1</sup>H NMR (400 MHz, CDCl<sub>3</sub>) δ 1.31 (s, 3H, CH<sub>3</sub>), 1.52 (s, 3H, CH<sub>3</sub>), 1.53-1.61 (m, 1H, CHHCH<sub>2</sub>), 1.75-1.78 (dd, 2H *J* = 8.4, 6.0 Hz, CHHCH<sub>2</sub>), 1.86-1.96 (bs, 1H, OH), 1.94-2.01 (m, 1H, CHHCH<sub>2</sub>), 2.06-2.18 (m, 2H, CHHCH<sub>2</sub>), 2.56-2.74 (m, 3H, CHCH, CO<sub>2</sub>CH<sub>2</sub>CH<sub>2</sub>), 3.01-3.07 (m, 1H, CHCH), 9.85 (d, *J* = 3.0 Hz, 1H, CHO); <sup>13</sup>C NMR (100 MHz, CDCl<sub>3</sub>) δ 24.6, 25.4, 27.2,

28.8, 31.1, 41.8, 47.5, 62.0, 82.8, 87.8, 176.3, 203.8; HRMS (EI+) exact mass calculated for (C<sub>12</sub>H<sub>18</sub>O<sub>4</sub>-H<sub>2</sub>O) requires  $m/z$  208.1099, found  $m/z$  208.1097.  $[\alpha]_D^{23} = -79.6$  (c = 0.920, EtOH).

The butanolide obtained from the previous step (589 mg, 2.60 mmol) was immediately charged into a dry 50 mL flask along with dry THF (25 mL) and then cooled to 0 °C with stirring. A 2.0 M solution of LiAlH<sub>4</sub> in THF (5.2 mL, 10.4 mmol) was added dropwise over 10 min. The resulting solution was allowed to warm gradually to room temperature and then stirred for 12 h. The slurry was then quenched drop-wise carefully with water (320 μL), then 15% NaOH (320 μL), followed again by water (960 μL) to precipitate the aluminum salts from the reaction. After filtration, the organic filtrate was retained, and the solids were dissolved in a concentrated aqueous Rochelle's salt solution and stirred for 30 min, then extracted 3× with CH<sub>2</sub>Cl<sub>2</sub>, the organic extracts were combined with the organic filtrate and dried with Na<sub>2</sub>SO<sub>4</sub>, then purified via flash chromatography (10-20% EtOH/CH<sub>2</sub>Cl<sub>2</sub>) to afford the title compound as a colorless oil (512 mg, 85% yield over 2 steps). IR (film) 3366, 2876, 1375, 1058, 1023 cm<sup>-1</sup>; δ 3464, 2970, 1758, 1715, 937 cm<sup>-1</sup>; <sup>1</sup>H NMR (400 MHz, CD<sub>3</sub>OD) δ 1.15 (s, 3H, CH<sub>3</sub>), 1.31 (s, 3H, CH<sub>3</sub>), 1.41-1.70 (m, 7H, CH<sub>2</sub>CHH), 1.73-1.79 (m, 2H, CH<sub>2</sub>CHH), 1.83-1.89 (m, 1H, CHCH), 2.07-2.14 (td, *J* = 9.3, 6.9 Hz, 1H, CHCH), 3.49-3.62 (m, 3H, CHHOH), 3.79-3.79 (m, 1H, CHHOH); <sup>13</sup>C NMR (100 MHz, CD<sub>3</sub>OD) δ 25.9, 26.4, 27.7, 28.1, 35.2, 41.9, 52.3, 54.8, 63.8, 64.3, 74.7, 82.3; HRMS (EI+) exact mass calculated for (C<sub>12</sub>H<sub>24</sub>O<sub>4</sub>) requires  $m/z$  232.1675, found  $m/z$  232.1624.  $[\alpha]_D^{23} = -5.2$  (c = 0.760, EtOH).

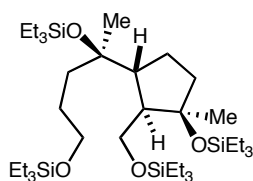

**(1R,2R,3R)-2-(Triethyl-silyloxymethyl)-3-((R)-2,5-bis-(triethylsilyloxy)pentan-2-yl)-1-**

**methylcyclopentanol-(triethylsilyl) ether:** Tetraol from previous step (160 mg, 0.690 mmol) was charged into a dry 25 mL flask along with CH<sub>2</sub>Cl<sub>2</sub> (4.0 mL) and lutidine (968 μL, 8.28 mmol). The flask was then cooled to 0 °C and TESOTf was added dropwise over 10 min. The resulting solution was stirred for 45 min at 0 °C. The reaction was quenched with sodium bicarbonate and extracted with CH<sub>2</sub>Cl<sub>2</sub> (2 × 3 mL) then washed with water (2 × 3 mL). The

combined organic layers were dried and concentrated and then purified by flash silica gel chromatography (10% Et<sub>2</sub>O/pentane) to afford the title compound as a colorless oil (449 mg, 95% yield). IR (film) 2954, 2876, 1458, 1238, 1096, 1006 cm<sup>-1</sup>; <sup>1</sup>H NMR (400 MHz, CDCl<sub>3</sub>) δ 0.50-0.65 (m, 24H, SiCH<sub>2</sub>CH<sub>3</sub>), 0.91-1.01 (m, 36H, SiCH<sub>2</sub>CH<sub>3</sub>) 1.18 (s, 3H, CH<sub>3</sub>), 1.39 (s, 3H, CH<sub>3</sub>) 1.43-1.80 (m, 9H, CHHCH<sub>2</sub>, CHCH) 1.80-1.86 (m, 1H, CHCH), 3.52-3.59 (m, 3H, CHHOSi), 3.84-3.89 (m, 1H, CHHOSi); <sup>13</sup>C NMR (100 MHz, CDCl<sub>3</sub>) δ 4.6, 6.6, 6.9, 7.0, 7.1, 7.2, 7.3, 7.4, 24.8, 26.9, 28.2, 29.1, 38.8, 42.1, 48.8, 52.9, 63.6, 64.0, 78.0, 83.5; HRMS (EI+) exact mass calculated for (C<sub>36</sub>H<sub>80</sub>O<sub>4</sub>Si<sub>4</sub>-CH<sub>2</sub>CH<sub>3</sub>) requires *m/z* 659.4742, found *m/z* 659.4714. [ $\alpha$ ]<sub>D</sub><sup>23</sup> = -10.2 (c = 0.844, CHCl<sub>3</sub>).

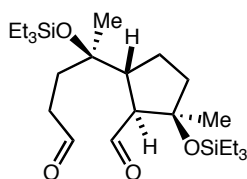

**(1S,2R,5R)-5-((R)-4-Formyl-2-triethyl-silyloxybutan-2-yl)-2-triethyl-silyloxy-2-**

**methylcyclo- pentanecarbaldehyde 8:** A 2.0 M solution of oxalyl chloride (2.28 mL, 4.56 mmol) was charged into a dry 15 mL Schlenk flask under argon sweep along with dry CH<sub>2</sub>Cl<sub>2</sub> (6.0 mL), then cooled to -78 °C with stirring. Dry DMSO (649 μL, 9.11 mmol) was added as a solution in dry CH<sub>2</sub>Cl<sub>2</sub> (4.0 mL). After 15 min, gas evolution had ceased, and a pre-cooled solution of (1R,2R,3R)-2-(triethyl-silyloxymethyl)-3-((R)-2,5-bis-(triethylsilyloxy)pentan-2-yl)-1-methylcyclopentanol (triethylsilyl) ether in CH<sub>2</sub>Cl<sub>2</sub> (4.0 mL) was added dropwise, then rinsed with dry CH<sub>2</sub>Cl<sub>2</sub> (2 × 1.0 mL). The reaction was allowed to stir 20 min at -78 °C then warmed to -40 °C and stirred another 20 min at that temperature. The flask was once again cooled to -78 °C and treated dropwise with triethylamine (2.52 mL, 18.1 mmol). The reaction was stirred 15 min further at -78 °C then allowed to gradually warm to room temperature (with the precipitation of amine-HCl salt). The contents of the reaction flask were poured directly into 25 mL of ice-cold water and then extracted with CH<sub>2</sub>Cl<sub>2</sub> (2 × 15 mL). After washing combined organics with brine solution, they were dried with Na<sub>2</sub>SO<sub>4</sub>, then directly filtered over a pad of silica gel and concentrated. The bisaldehyde **8** formed was unstable, and therefore quickly used in the next step without prolonged storage. IR (film) 2956, 2876, 1721, 1458, 1238, 1121, 1041

$\text{cm}^{-1}$ ;  $^1\text{H}$  NMR (400 MHz,  $\text{CDCl}_3$ )  $\delta$  0.57-0.62 (m, 12H,  $\text{SiCH}_2\text{CH}_3$ ), 0.92-0.98 (m, 18H,  $\text{SiCH}_2\text{CH}_3$ ), 1.06 (s, 3H,  $\text{CH}_3$ ), 1.47 (s, 3H,  $\text{CH}_3$ ), 1.62-1.91 (m, 6H,  $\text{CHHCH}_2$ ), 2.45-2.50 (m, 3H,  $\text{CHHCHO}$ ,  $\text{CHCH}$ ), 2.71-2.76 (m, 1H,  $\text{CHCHCHO}$ ), 9.68 (d,  $J = 3.6$  Hz, 1H, CHO), 9.79 (t,  $J = 0.8$  Hz, 1H, CHO);  $^{13}\text{C}$  NMR (100 MHz,  $\text{CDCl}_3$ )  $\delta$  6.7, 7.0, 7.1, 7.2, 24.9, 26.4, 27.8, 33.2, 40.0, 42.2, 47.5, 63.2, 76.3, 86.0, 201.7, 205.2; HRMS (EI+) exact mass calculated for ( $\text{C}_{24}\text{H}_{49}\text{O}_4\text{Si}_2\text{-CH}_2\text{CH}_3$ ) requires  $m/z$  427.2694, found  $m/z$  427.2685.  $[\alpha]_D^{23} = -19.5^\circ$  ( $c = 0.556$ ,  $\text{CHCl}_3$ ).

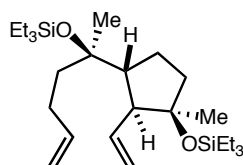

**(1R,2S,3R)-3-((R)-2-(Triethyl-silanyloxy)-hex-5-en-2-yl)-1-methyl-2-vinylcyclopentanol-**

**(triethylsilyl) ether:** To a dry 25 mL flask under argon was added methyltriphenylphosphonium bromide (1.63 g, 4.56 mmol) followed by 6 mL of dry THF. The flask and its contents were then cooled to  $0^\circ\text{C}$ . A 2.5 M solution of *n*-butyl lithium (1.78 mL, 4.45 mmol) was added dropwise (resulting in a bright orange color) and allowed to warm to room temperature and age 30 min. The contents of the flask were again cooled to  $0^\circ\text{C}$  at which point the previous bisaldehyde was added as a solution in THF (6.0 mL). The reaction was allowed to warm to room temperature and further stirred 12 h. When the reaction was deemed complete by TLC, the entire reaction slurry was concentrated and then purified directly via flash chromatography (10% EtOAc/hexanes) to afford the title compound as a colorless oil (371 mg, 72% yield over two steps). IR (film) 2955, 2876, 1458, 1238, 1122, 1009  $\text{cm}^{-1}$ ;  $^1\text{H}$  NMR (400 MHz,  $\text{CDCl}_3$ )  $\delta$  0.53-0.62 (m, 12H,  $\text{SiCH}_2\text{CH}_3$ ), 0.92-0.99 (m, 18H,  $\text{SiCH}_2\text{CH}_3$ ), 1.15 (s, 3H,  $\text{CH}_3$ ), 1.22 (s, 3H,  $\text{CH}_3$ ), 1.42-1.52 (m, 3H,  $\text{CHHCH}_2$ ), 1.62-1.85 (m, 4H,  $\text{CHHCH}_2$ ,  $\text{CHCH}$ ), 1.96-2.17 (m, 3H, CH-allyl), 4.90-5.03 (m, 4H,  $\text{CH=CH}_2$ ), 5.76-5.85 (m, 2H,  $\text{CH=CH}_2$ );  $^{13}\text{C}$  NMR (100 MHz,  $\text{CDCl}_3$ , 77.2)  $\delta$  6.7, 7.0, 7.2, 7.3, 24.4, 25.7, 26.6, 29.3, 40.9, 42.4, 50.8, 57.63, 78.0, 84.9, 113.9, 115.0, 139.3, 142.4; HRMS (EI+) exact mass calculated for ( $\text{C}_{26}\text{H}_{52}\text{O}_2\text{Si}_2$ ) requires  $m/z$  452.3506, found  $m/z$  452.3515.  $[\alpha]_D^{23} = -29.1$  ( $c = 0.689$ ,  $\text{CHCl}_3$ ).



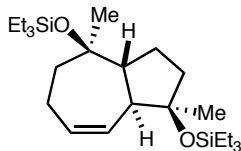

**(Z,1R,3aR,4R,8aS)-1,2,3,3a,4,5,6,8a-Octahydro-1,4-dimethylazulene-1,4-diol-1,4-**

**bis(triethyl-silyl) ether (9):** The diene from the previous step (185 mg, 0.409 mmol) and dichloroethane (41 mL) were charged into a dry 100 mL round-bottom flask fitted with a reflux condenser and stirbar. The solvent was degassed by bubbling a stream of argon through the flask for 15 min. Grubbs second generation catalyst (52 mg, 0.0614 mmol) was added in one portion and the contents of the flask placed under argon. The reaction was heated to 70 °C for 1 hour and filtered over a pad of Florisil then concentrated. The crude product was purified by silica flash column chromatography (10% Et<sub>2</sub>O/pentane) to yield **8** as a colorless oil (135 mg, 78% yield). IR (film) 2954, 2875, 1457, 1374, 1235, 1101, 1009 cm<sup>-1</sup>; <sup>1</sup>H NMR (400 MHz, CDCl<sub>3</sub>) δ 0.49-0.57 (m, 12 H, SiCH<sub>2</sub>CH<sub>3</sub>), 0.88-0.94 (m, 18 H, SiCH<sub>2</sub>CH<sub>3</sub>), 1.14 (s, 3H, CH<sub>3</sub>), 1.25 (s, 3H, CH<sub>3</sub>), 1.39-1.45 (m, 1H, CHHCH<sub>2</sub>), 1.47-1.54 (m, 1H, CHHCH<sub>2</sub>), 1.61-1.82 (m, 5 H, CHHCH<sub>2</sub>, CHCH), 1.84-1.92 (m, 1H, CH-allyl), 2.10-2.21 (m, 2H, CH-allyl), 5.68-5.75 (m, 1H, CH=CH), 5.80-5.84 (m, 1H, CH=CH); <sup>13</sup>C NMR (100 MHz, CDCl<sub>3</sub>) δ 6.7, 7.0, 7.1, 7.2, 21.6, 23.7, 23.9, 26.5, 40.2, 42.6, 52.1, 53.5, 78.4, 82.9, 130.1, 132.5; HRMS (EI+) exact mass calculated for (C<sub>24</sub>H<sub>48</sub>O<sub>2</sub>Si<sub>2</sub>) requires *m/z* 424.3193, found *m/z* 424.3171. [α]<sub>D</sub><sup>23</sup> = +10.3 (c = 0.178, CHCl<sub>3</sub>).

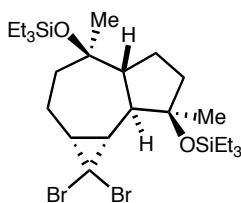

**(1aR,4R,4aR,7R,7aR,7bS)-1,1-Dibromo-decahydro-4,7-dimethyl-1H-cyclopropa[e]azulene-**

**4,7-diol-4,7-bis(triethyl-silyl) ether:** A dry 4 mL vial equipped with stirbar, was charged with KO<sup>t</sup>Bu (66.4 mg, 0.590 mmol), **9** (50 mg, 0.118 mmol) and anhydrous hexane (400 μL). The vial was then cooled to 0 °C, and bromoform (149 mg, 0.590 mmol) was added as a solution in hexane (400 μL) over one minute. The heterogeneous white mixture was allowed to age at 0 °C for 2 h. The reaction was quenched into water (3 mL), and then extracted with dichloromethane

(3 × 1 mL). Crude reaction mixture was dried with sodium sulfate and then concentrated. Purification was achieved by silica gel flash column chromatography (10% Et<sub>2</sub>O/pentane) to yield title compound as a colorless oil (67.5 mg, 96% yield). IR (film) 2955, 2874, 1457, 1235, 1117, 1002, 700, 671 cm<sup>-1</sup>; <sup>1</sup>H NMR (400 MHz, CDCl<sub>3</sub>) δ 0.52-0.67 (m, 12 H, SiCH<sub>2</sub>CH<sub>3</sub>), 0.92-1.05 (m, 19 H, SiCH<sub>2</sub>CH<sub>3</sub>, CH-cypr), 1.07 (s, 3H, CH<sub>3</sub>), 1.20-1.42 (m, 2 H, CHHCH<sub>2</sub>, CH-cypr), 1.43 (s, 3H, CH<sub>3</sub>), 1.60-1.79 (m, 5H, CHHCH<sub>2</sub>), 1.81-1.91 (m, 1H, CHHCH<sub>2</sub>), 2.03 (dd, 1H, *J* = 11.4, 9.7 Hz, CHCH), 2.09-2.18 (m, 1H, CHHCH<sub>2</sub>) 2.22 (td, 1H, *J* = 7.2, 3.6 Hz, CHCH); <sup>13</sup>C NMR (100 MHz, CDCl<sub>3</sub>) δ 6.60, 7.0, 7.1, 7.2, 20.5, 23.9, 24.7, 25.9, 31.9, 32.6, 40.0, 40.1, 42.1, 52.0, 53.8, 78.2, 82.8; HRMS (EI+) exact mass calculated for (C<sub>25</sub>H<sub>48</sub>Br<sub>2</sub>O<sub>2</sub>Si<sub>2</sub>-Br) requires *m/z* 517.2356, found *m/z* 517.2368.  $[\alpha]_D^{23} = -57.1$  (c = 0.222, CHCl<sub>3</sub>).

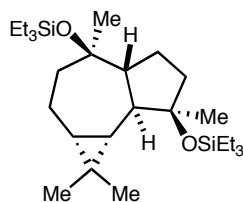

**(1aR,4R,4aR,7R,7aS,7bR)-Decahydro-1,1,4,7-tetramethyl-1H-cyclopropa[e]azulene-4,7-diol-4,7-bis(triethyl-silyl) ether:** A dry 15 mL Schlenk tube equipped with stirbar was charged with CuI (320 mg, 1.68 mmol) and anhydrous ether (840 μL). The tube was then cooled to -78 °C, and a 1.6 M solution of MeLi (2.10 ml, 3.35 mmol) was added over 30 min. The heterogeneous white mixture was allowed to warm to -20 °C for 10 min. The homogeneous yellow solution was then re-cooled to -78 °C and dibromide from previous step (100 mg, 0.168 mmol) was then added slowly as a solution in dry ether (250 μL) at -78 °C. The reaction was stirred at 0 °C over the next 48 h. Iodomethane (600 μL, excess) was slowly added at -20 °C and the mixture was allowed to come to room temperature and further stirred 6 h, before being filtered over a pad of Florisil and concentrated. The crude product was purified by silica gel flash column chromatography (10% Et<sub>2</sub>O/pentane) to yield the title compound as a colorless oil (78 mg, 99% yield). IR (film) 2953, 2912, 2875, 1457, 1237, 1097, 1004 cm<sup>-1</sup>; <sup>1</sup>H NMR (400 MHz, CDCl<sub>3</sub>) δ 0.48-0.59 (m, 12H, SiCH<sub>2</sub>CH<sub>3</sub>), 0.71-0.85 (m, 2H, CH-cypr), 0.93-0.98 (m, 22H CH<sub>3</sub>, CHHCH<sub>2</sub>, SiCH<sub>2</sub>CH<sub>3</sub>), 1.02 (s, 3H, CH<sub>3</sub>), 1.05 (s, 3H, CH<sub>3</sub>), 1.22 (s, 3H, CH<sub>3</sub>), 1.26-1.36 (m, 2H, CHHCH<sub>2</sub>), 1.56-1.86 (m, 6H, CHCH, CHHCH<sub>2</sub>), 2.18 (td, 1H, *J* = 11.0, 5.0 Hz, CHCH); <sup>13</sup>C

NMR (100 MHz, CDCl<sub>3</sub>) δ 6.7, 7.0, 7.1, 7.2, 16.5, 18.5, 20.7, 20.8, 24.7, 25.4, 25.7, 25.9, 28.8, 40.7, 44.2, 49.2, 54.9, 78.7, 82.8; HRMS (EI) exact mass calculated for (C<sub>27</sub>H<sub>54</sub>O<sub>2</sub>Si<sub>2</sub>) requires *m/z* 466.3662, found *m/z* 466.3645.  $[\alpha]_D^{23} = -39.9$  (*c* = 1.40, CHCl<sub>3</sub>).

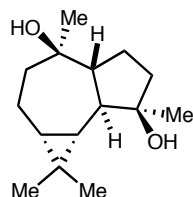

**(-)-4 $\alpha$ ,7 $\alpha$ -Aromadendranediol:** A 4 mL Teflon vial was equipped with a stir bar and then charged with bisilyl ether from previous step (30 mg, 0643 mmol) and MeCN (750  $\mu$ L). HF (5 drops, 48% aqueous) was added to the contents of the vial. The solution was allowed to stir 60 min until the silyl group deprotection was deemed complete by TLC. The solution was quenched with saturated sodium bicarbonate solution and extracted with ethyl ether (3  $\times$  1 mL). Extracts were washed with pH 7 phosphate buffer (compound is acid sensitive) then dried over sodium sulfate. The crude product was then purified by preparatory TLC (7:2 CHCl<sub>3</sub>: acetone, 250  $\mu$ M plate) to yield the title compound as a white crystalline solid (14.3 mg, 93% yield). IR (film) 3403, 2970, 2950, 1455, 1375, 1172 cm<sup>-1</sup>; <sup>1</sup>H NMR (400 MHz, CDCl<sub>3</sub>) δ 0.62-0.74 (m, 1H, CH-cypr), 0.82-0.92 (m, 1H, CH-cypr), 0.97 (s, 3H, CH<sub>3</sub>), 1.05 (s, 3H, CH<sub>3</sub>), 1.09 (s, 3H, CH<sub>3</sub>), 1.24 (s, 3H, CH<sub>3</sub>), 1.26-1.38 (m, 3H, OH, CHHCH<sub>2</sub>), 1.45-1.59 (ddd 2H, *J* = 10.7, 8.5, 7.6 Hz, CHHCH<sub>2</sub>), 1.64-1.76 (m, 4H, CHHCH<sub>2</sub>), 1.82-1.96 (m, 2H, CHHCH<sub>2</sub>, CHCH), 2.13-2.20 (td, 1H, *J* = 10.8, 4.9 Hz, CHCH); <sup>13</sup>C NMR (100 MHz, CDCl<sub>3</sub>) δ 16.4, 18.9, 19.7, 20.3, 23.7, 24.9, 25.6, 26.1, 28.8, 40.3, 44.2, 47.5, 54.5, 75.5, 80.2; HRMS (EI+) exact mass calculated for (C<sub>15</sub>H<sub>26</sub>O<sub>2</sub>) requires *m/z* 238.1933, found *m/z* 238.1931.  $[\alpha]_D^{23} = -39.0$  (*c* = 0.100, CHCl<sub>3</sub>). All spectral data were consistent with the previously reported literature values.<sup>7</sup>

■ Stereochemical Proofs of Selected Cascade Products

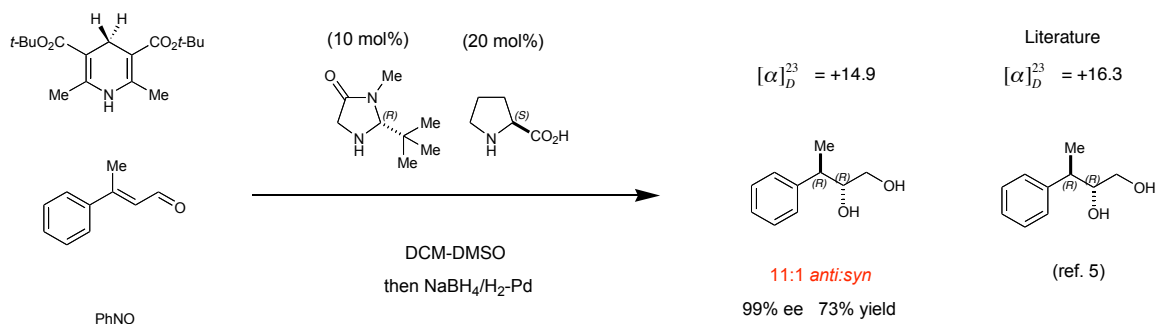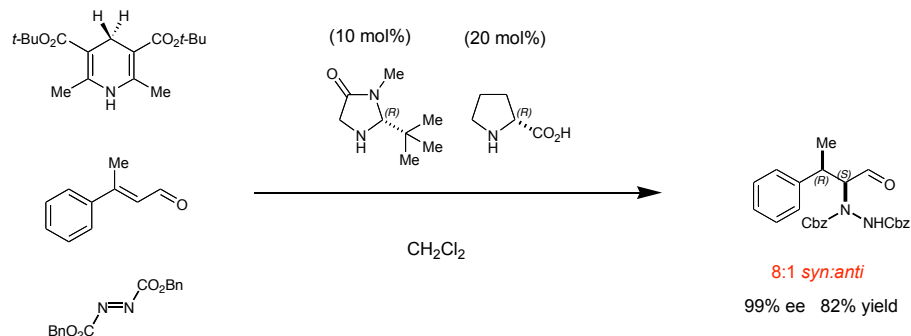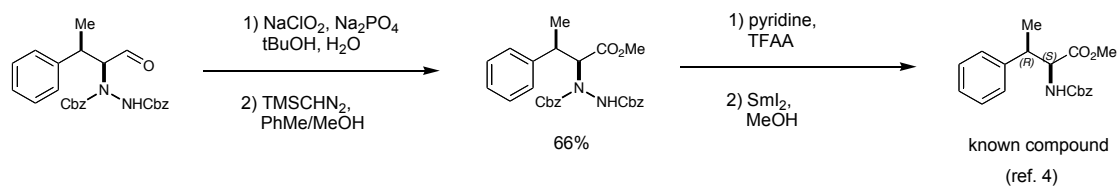

■ All spectral data of products are consistent with previously reported data.

<sup>1</sup> D. D. Perrin, W. L. F. Armarego, *Purification of Laboratory Chemicals* (Pergamon Press, Oxford, 1988) ed 3.

<sup>2</sup> A. B. Pangborn, M. A. Giardello, R. H. Grubbs, R. K. Rosen, F. J. Timmers, *Organometallics* **1996**, *15*, 1518.

<sup>3</sup> W. C. Still, M. Kahn, A. J. Mitra, *J. Org. Chem.* **1978**, *43*, 2923 (1978).

<sup>4</sup> L. M. Nogle, C. W. Mann, W. L. Watts, Y. Zhang, *J. Pharm. Biomed. Anal.* **2006**, *40*, 901-909.

<sup>5</sup> M. P. Pasto, A. Moyano, M. A. Pericas, A. Riera, *J. Org. Chem.* **1997**, *62*, 8425.

<sup>6</sup> M. Asaoka, K. Miyake, H. Takei, *Chem. Lett.* **1977**, *2*, 167.

<sup>7</sup> C. M. Beechan, C. Djerassi, H. Eggert, *Tetrahedron.* **1978**, *34*, 2503.

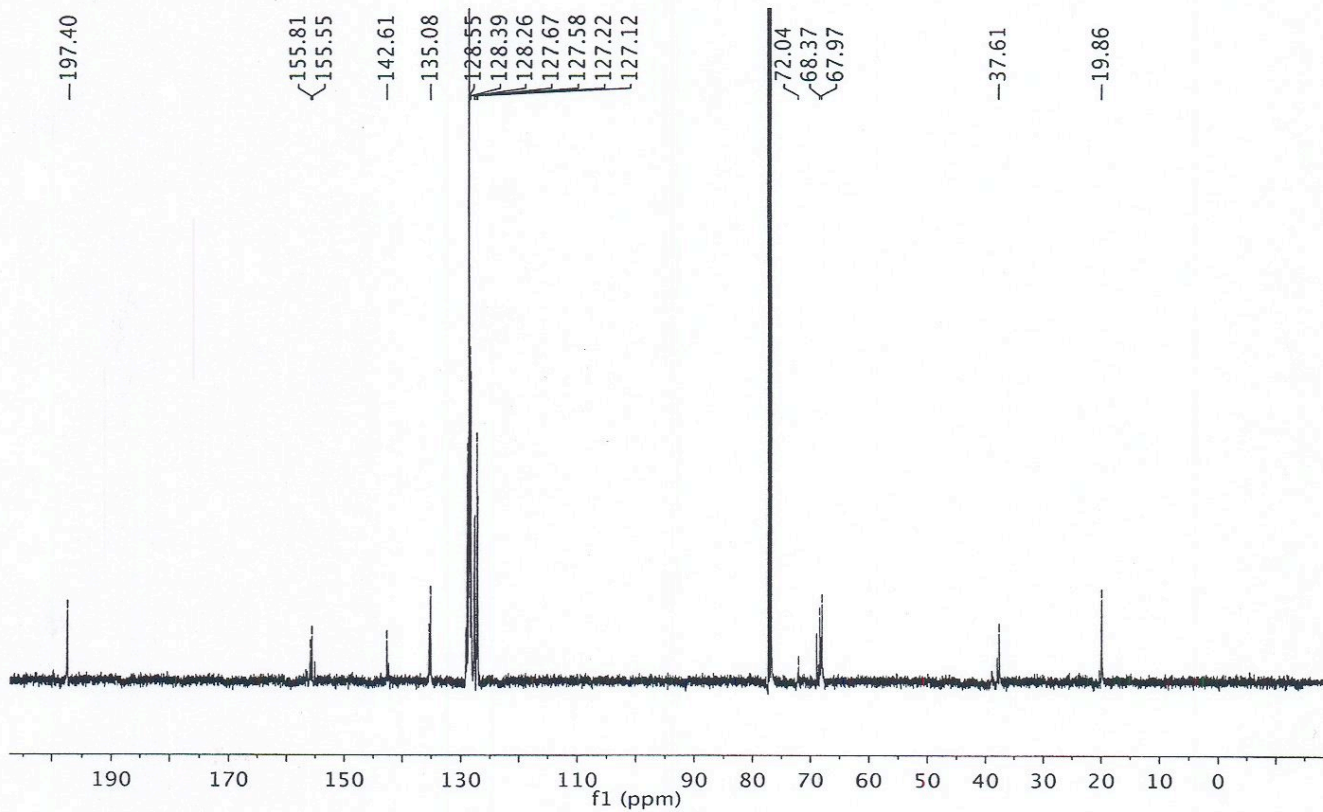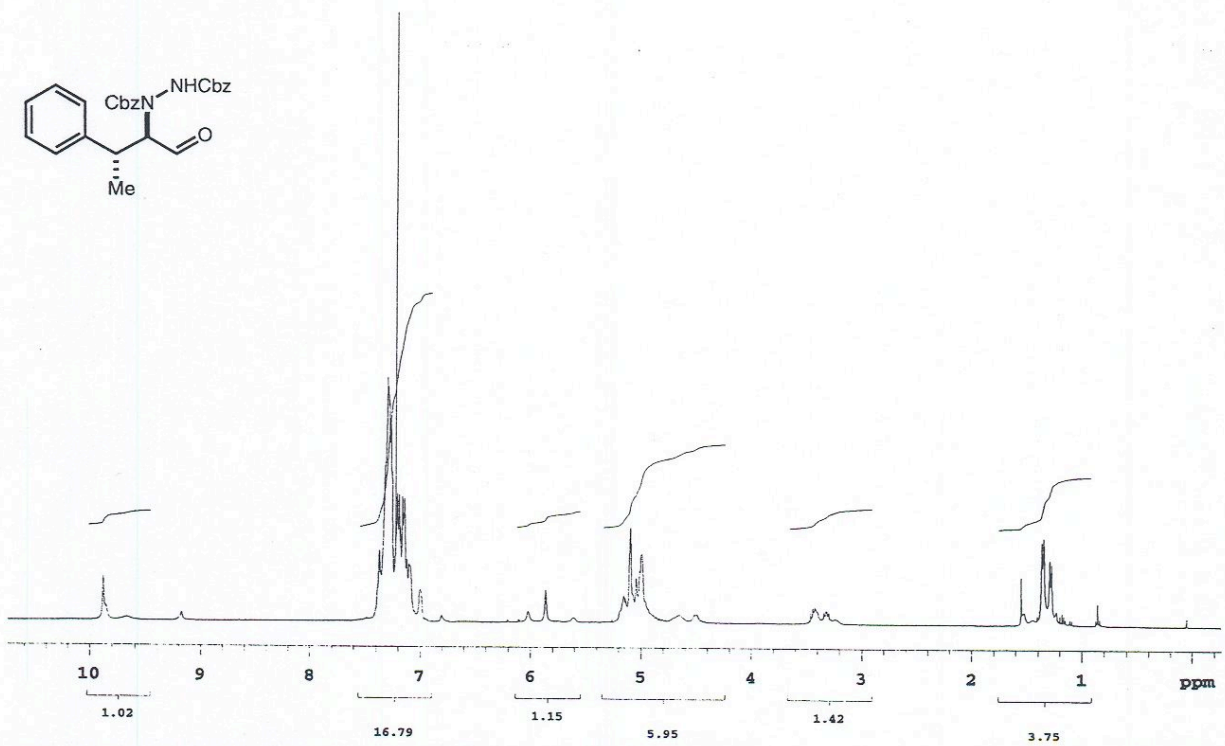

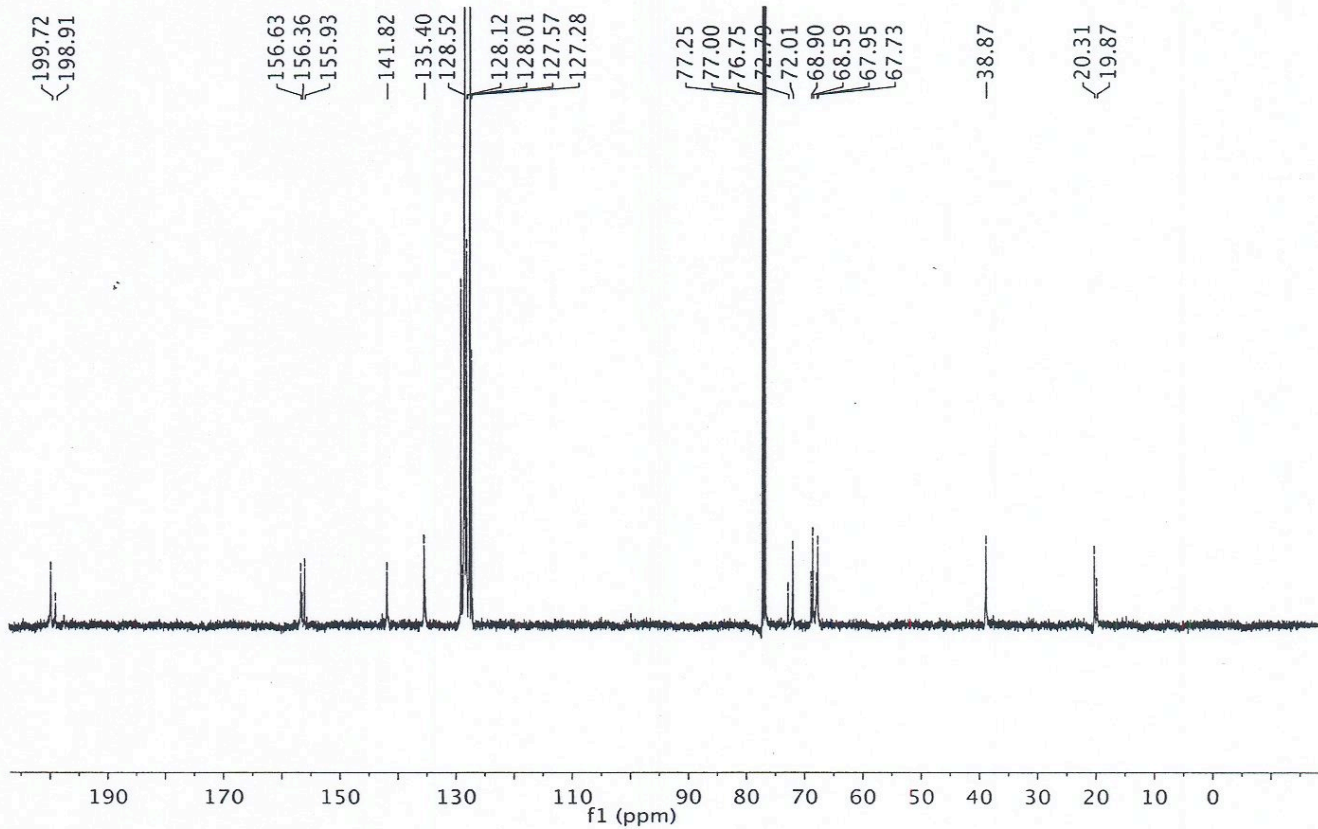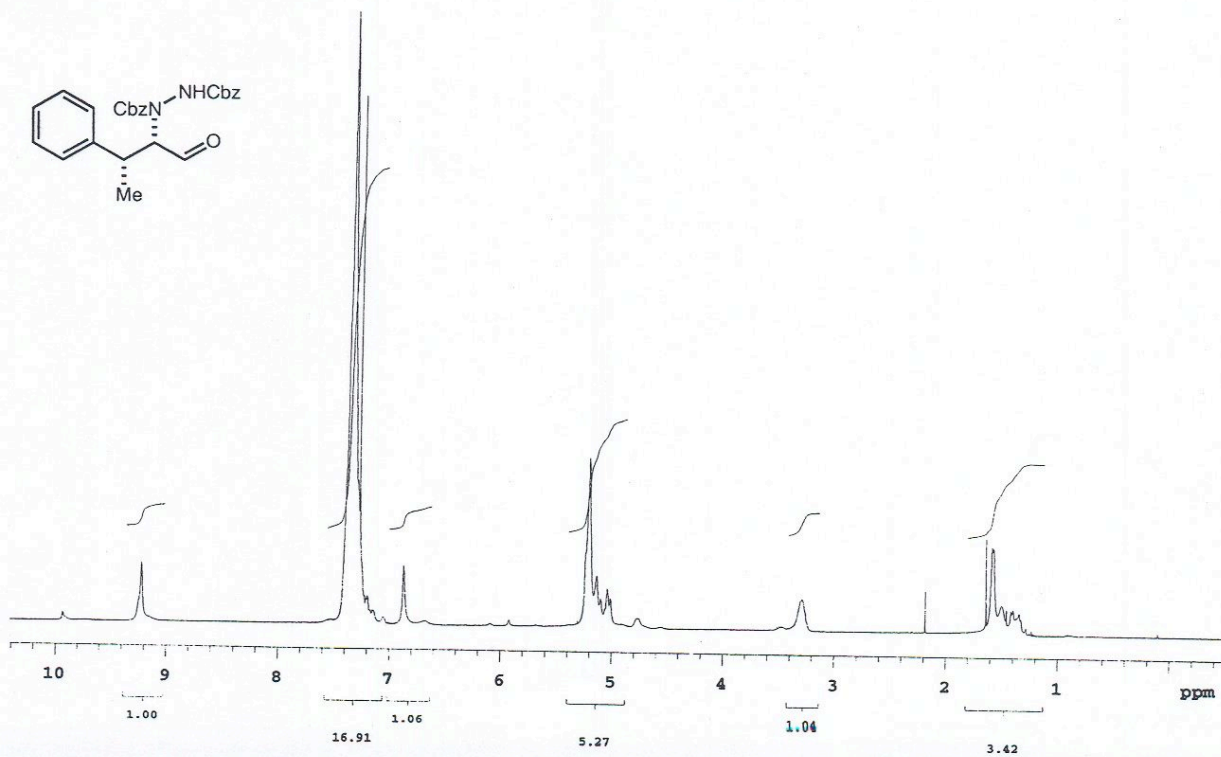



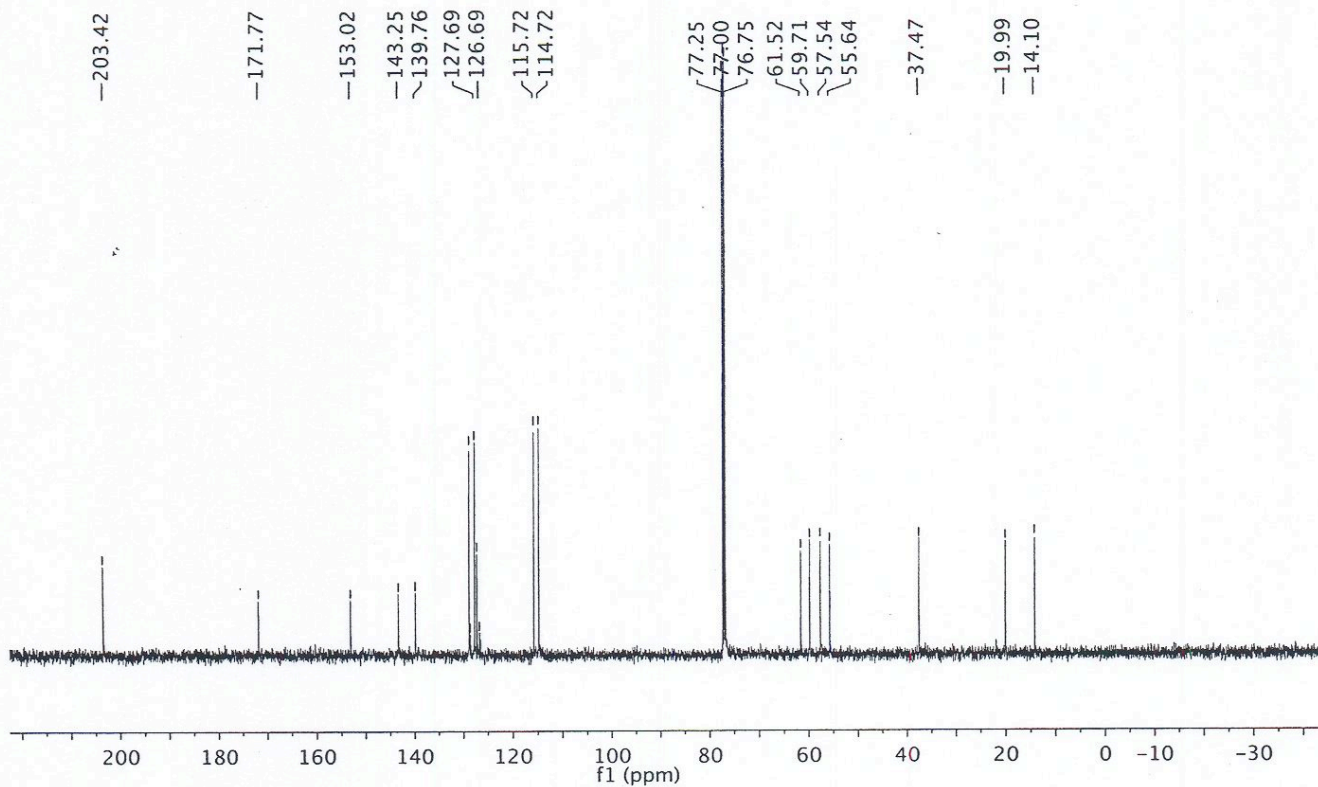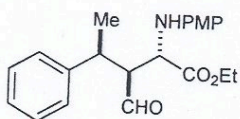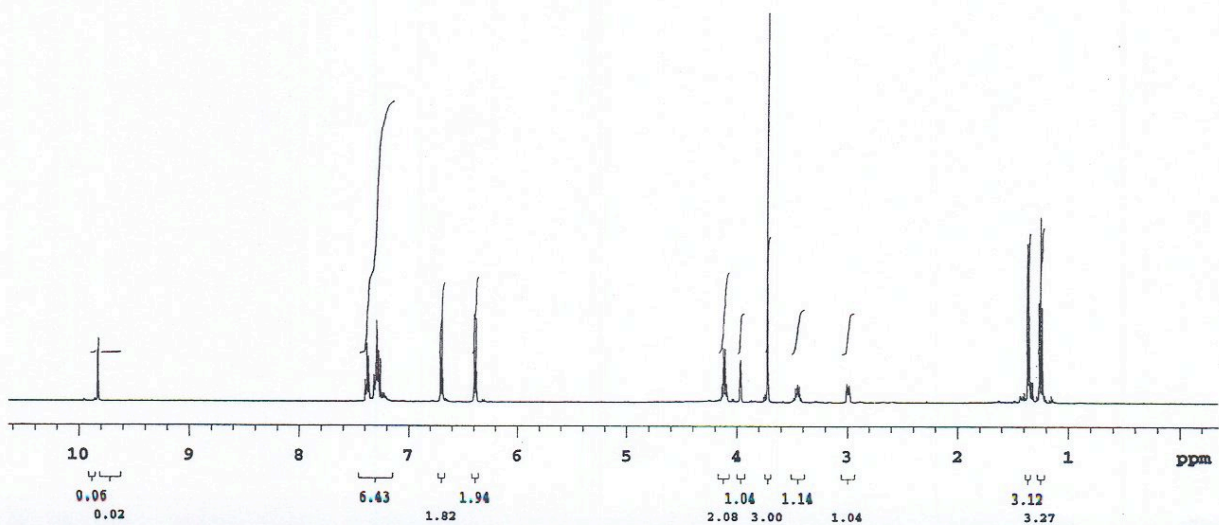

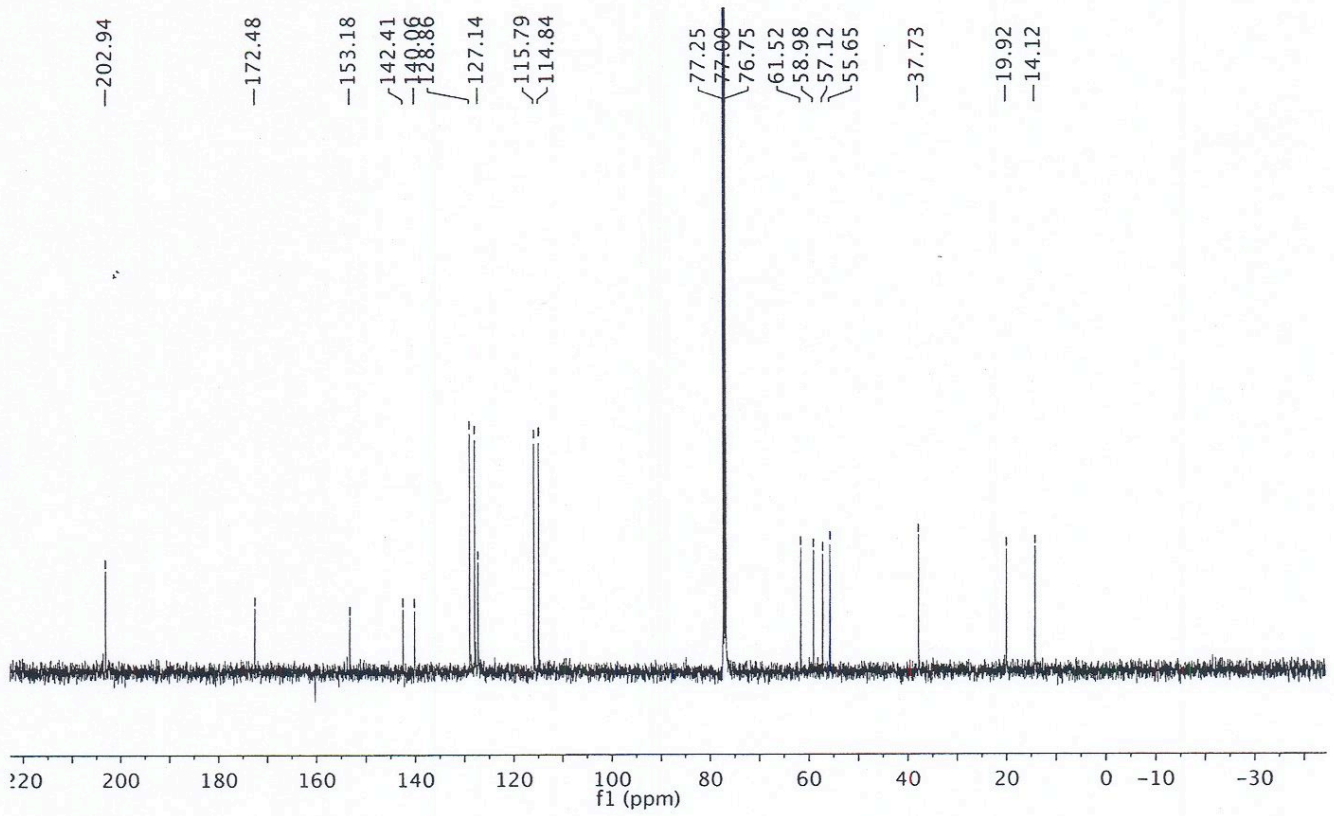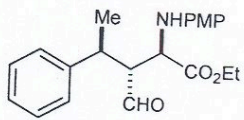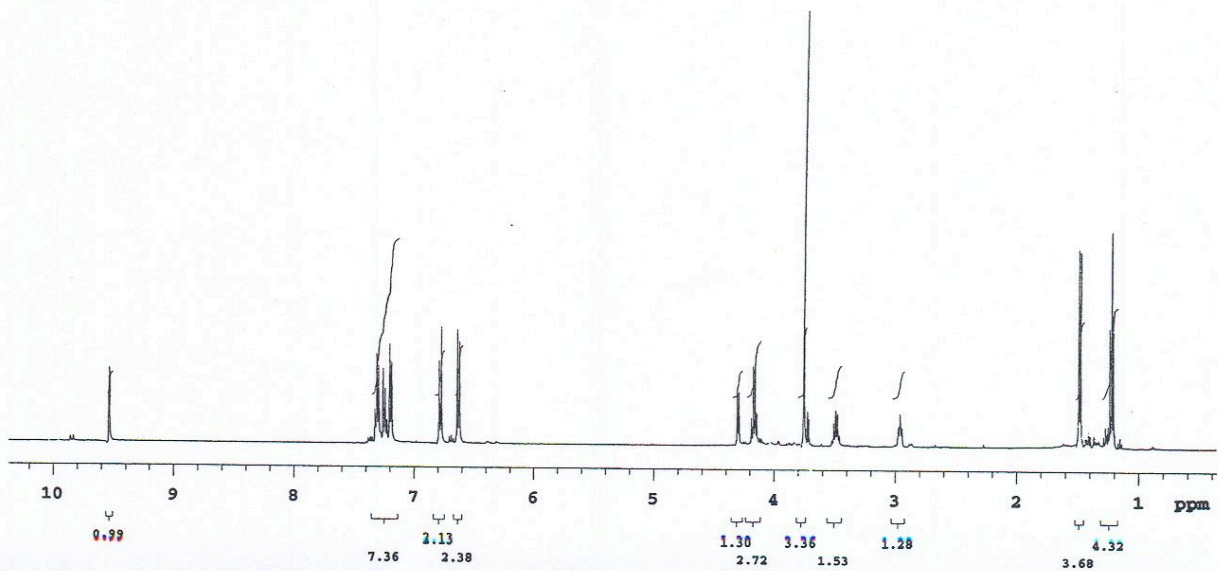



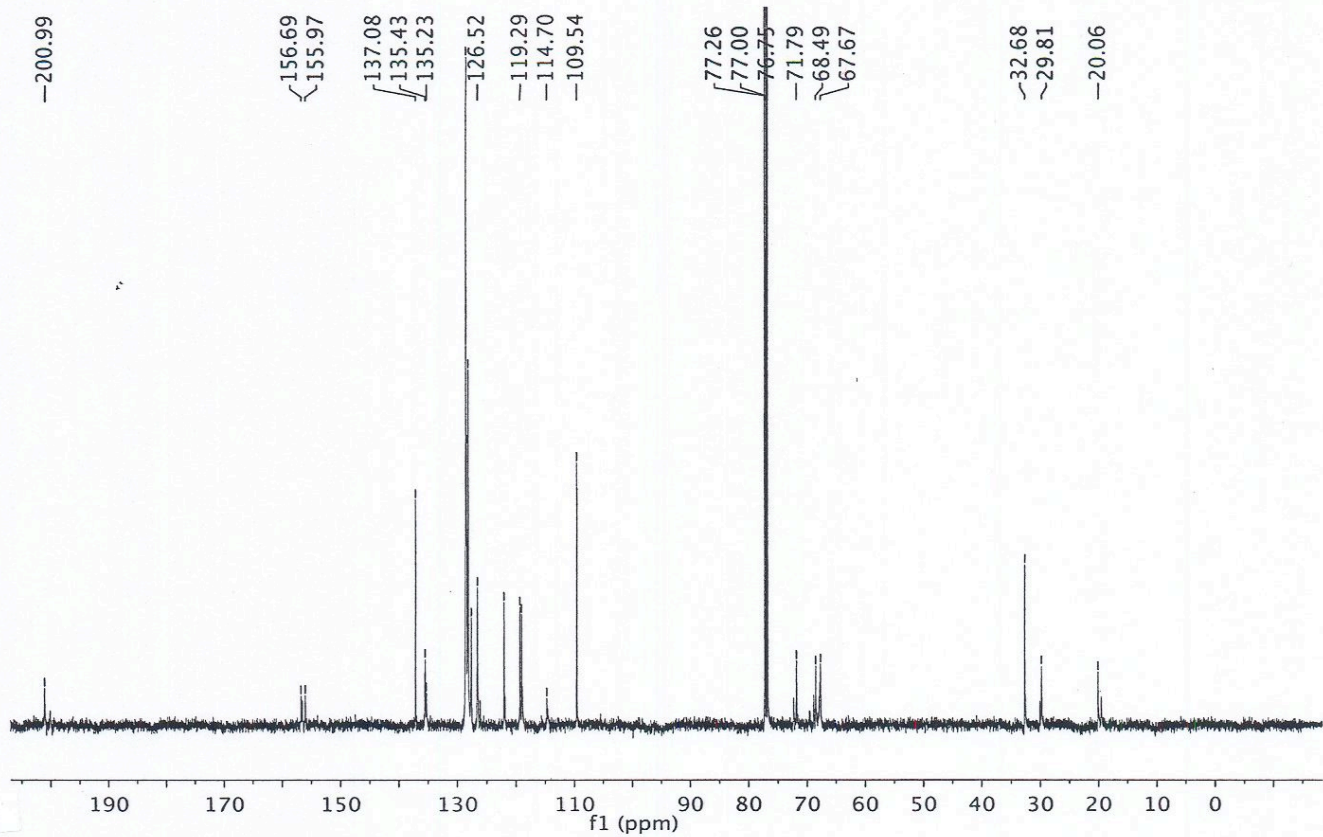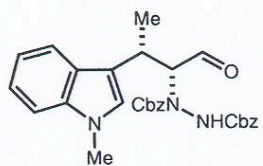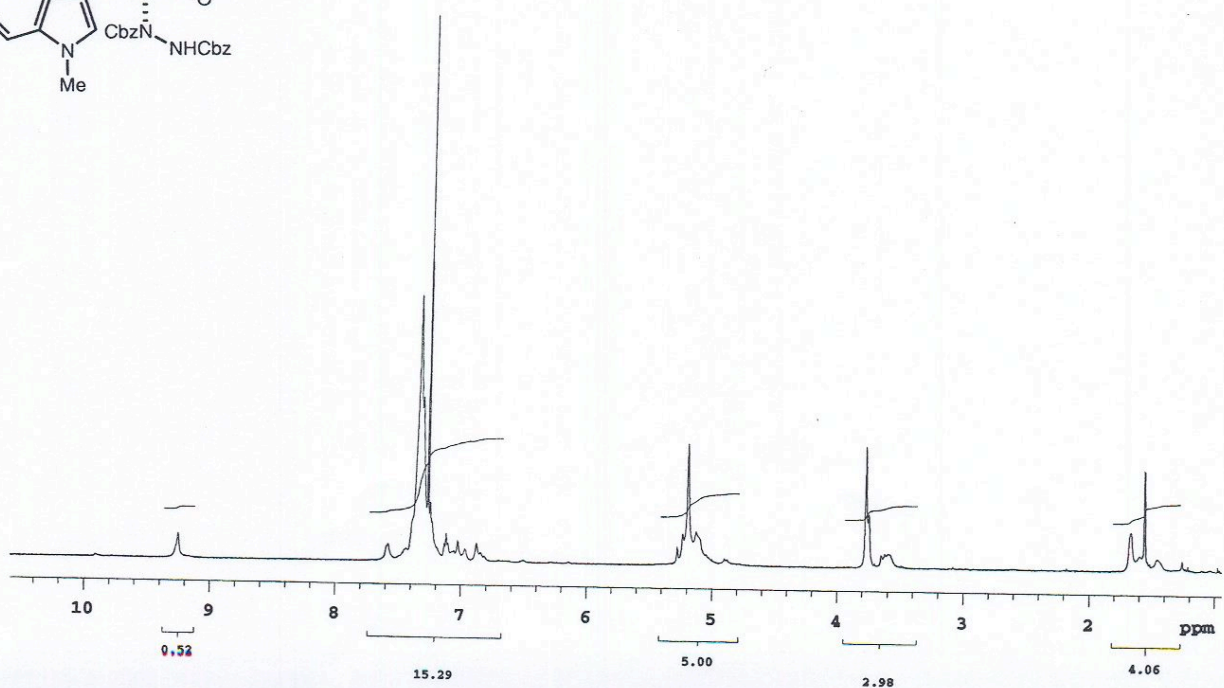

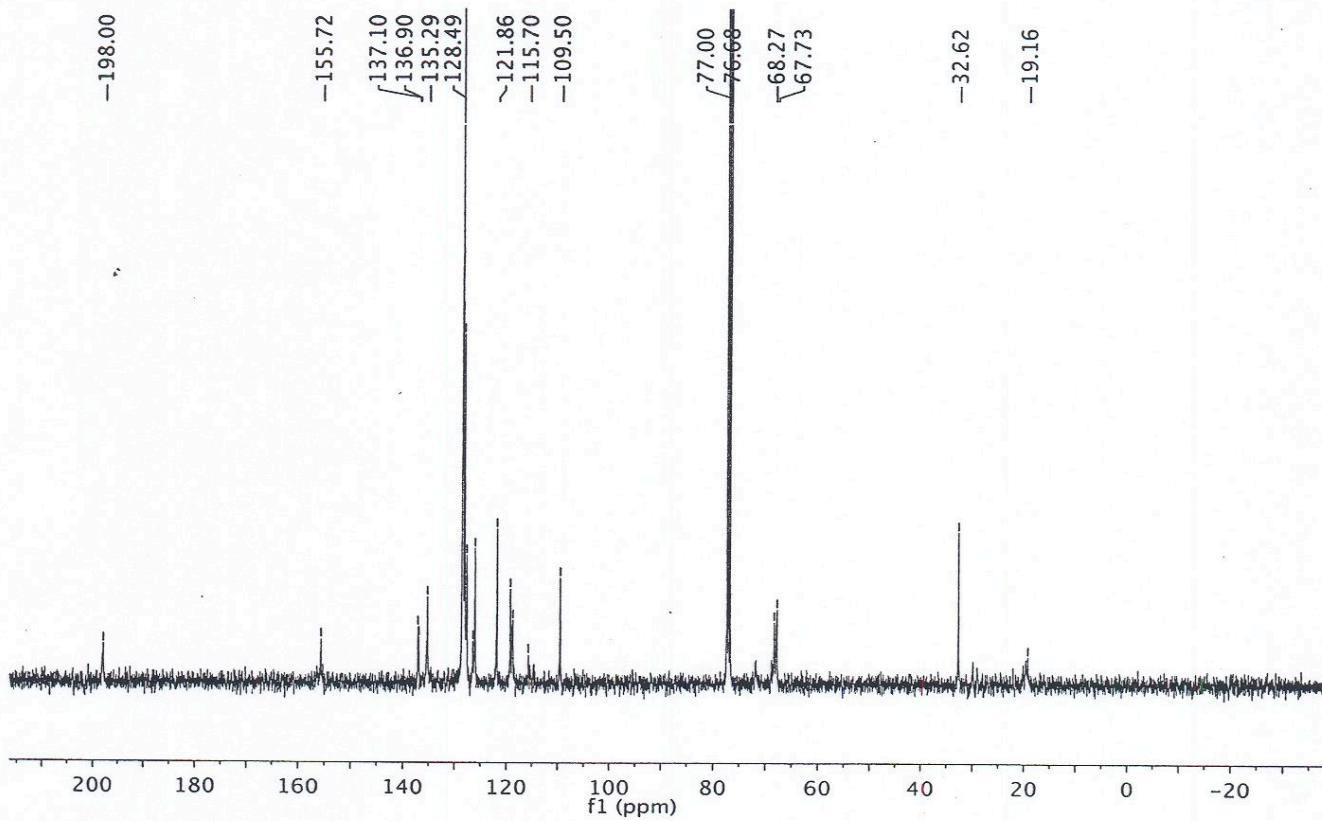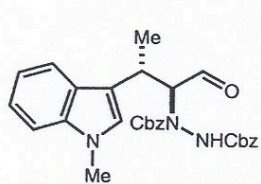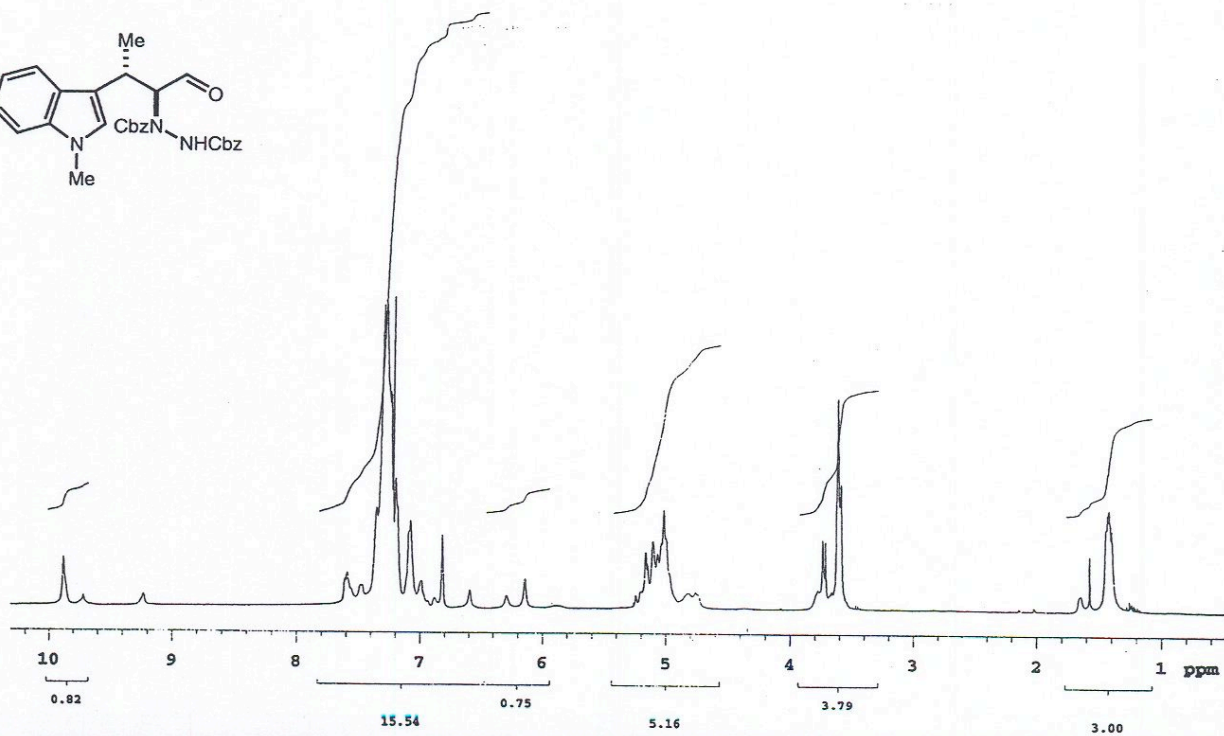

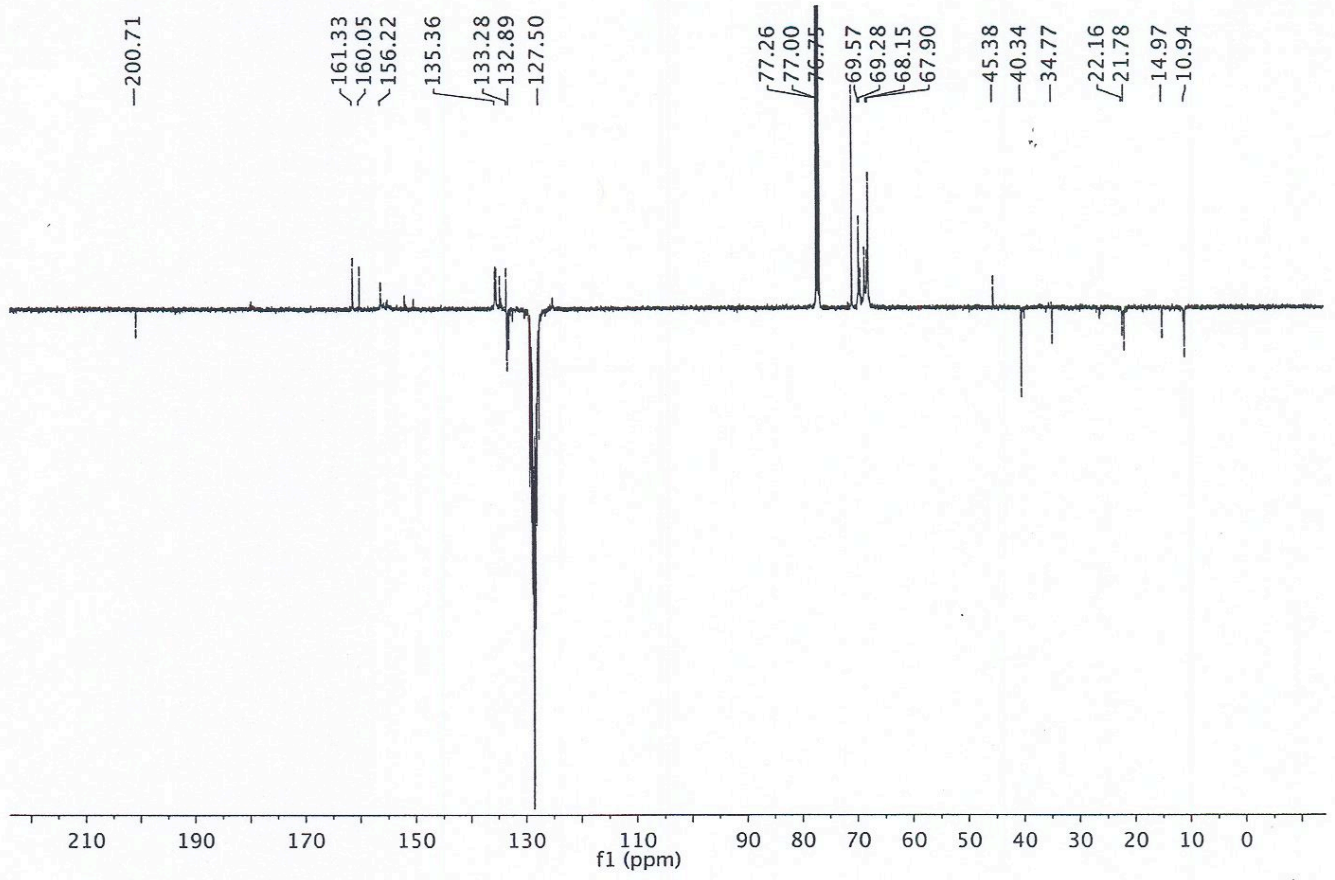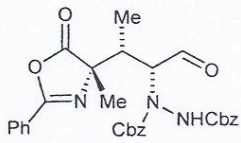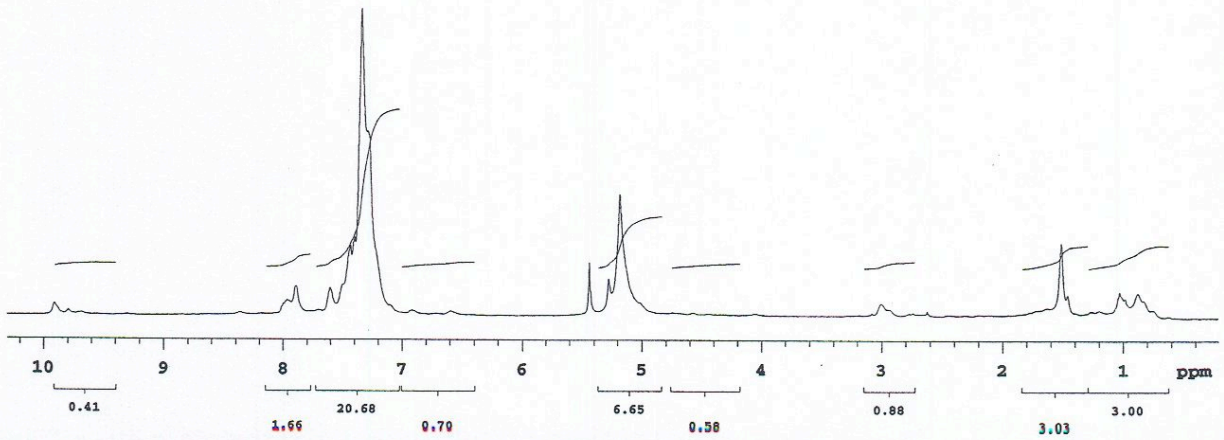



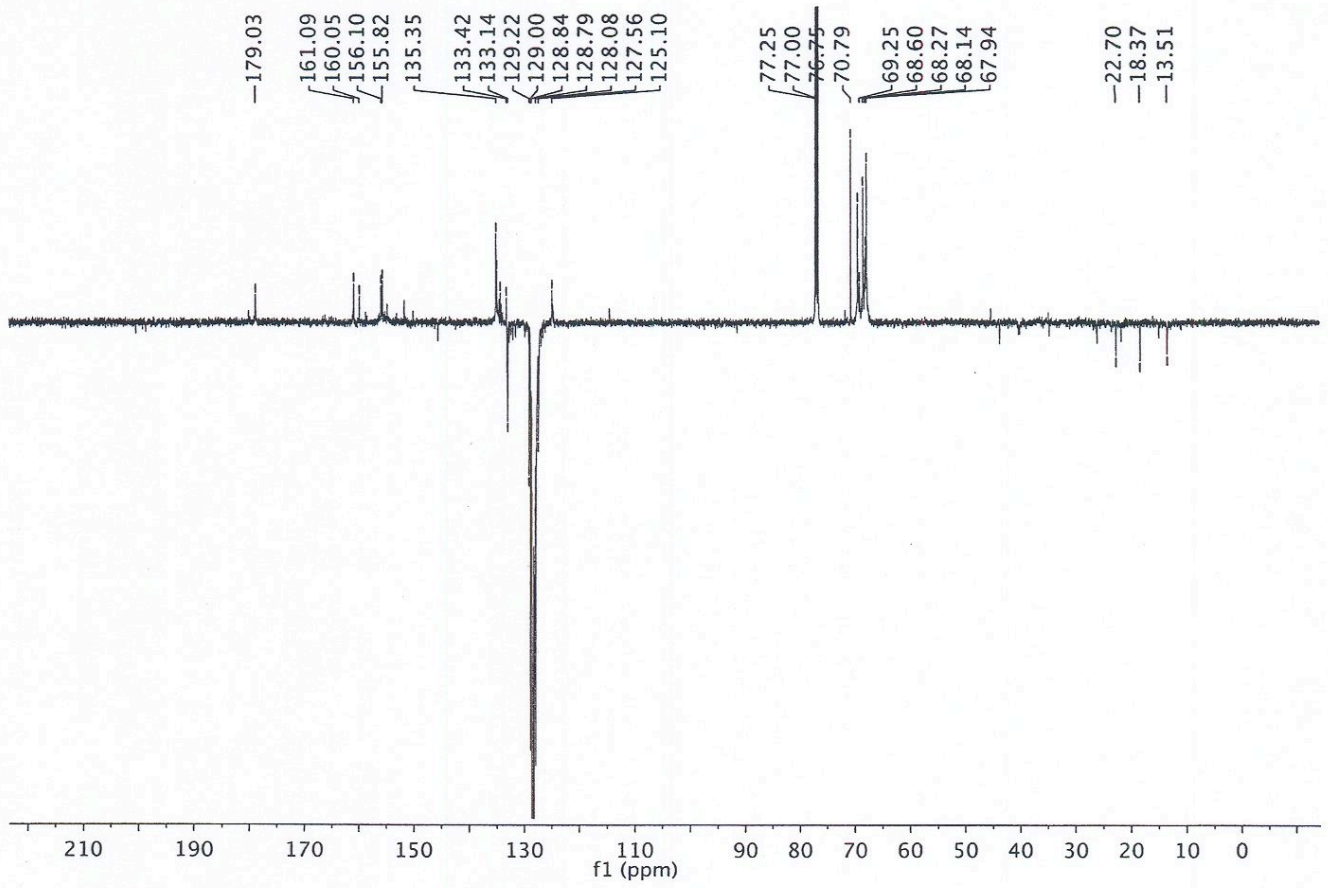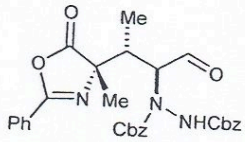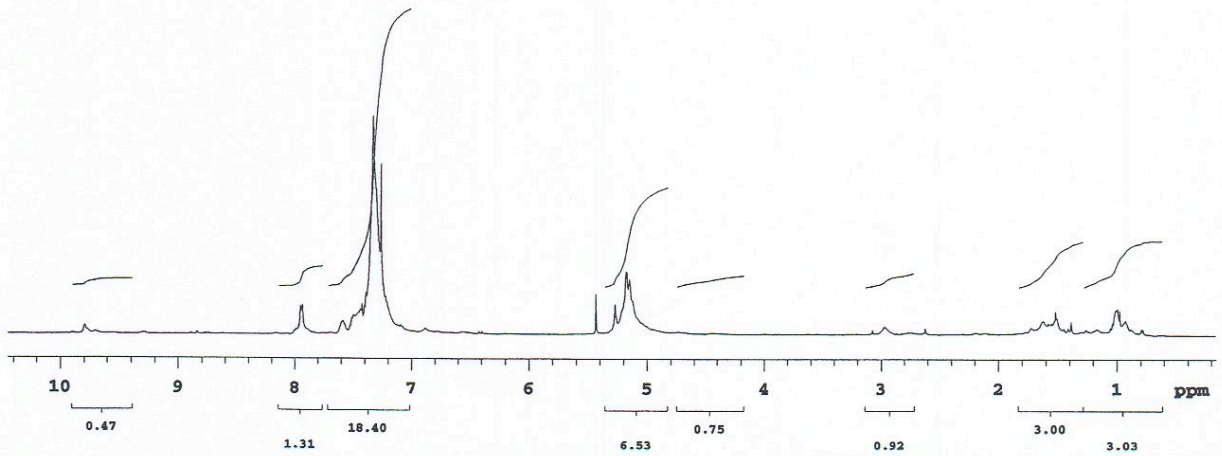

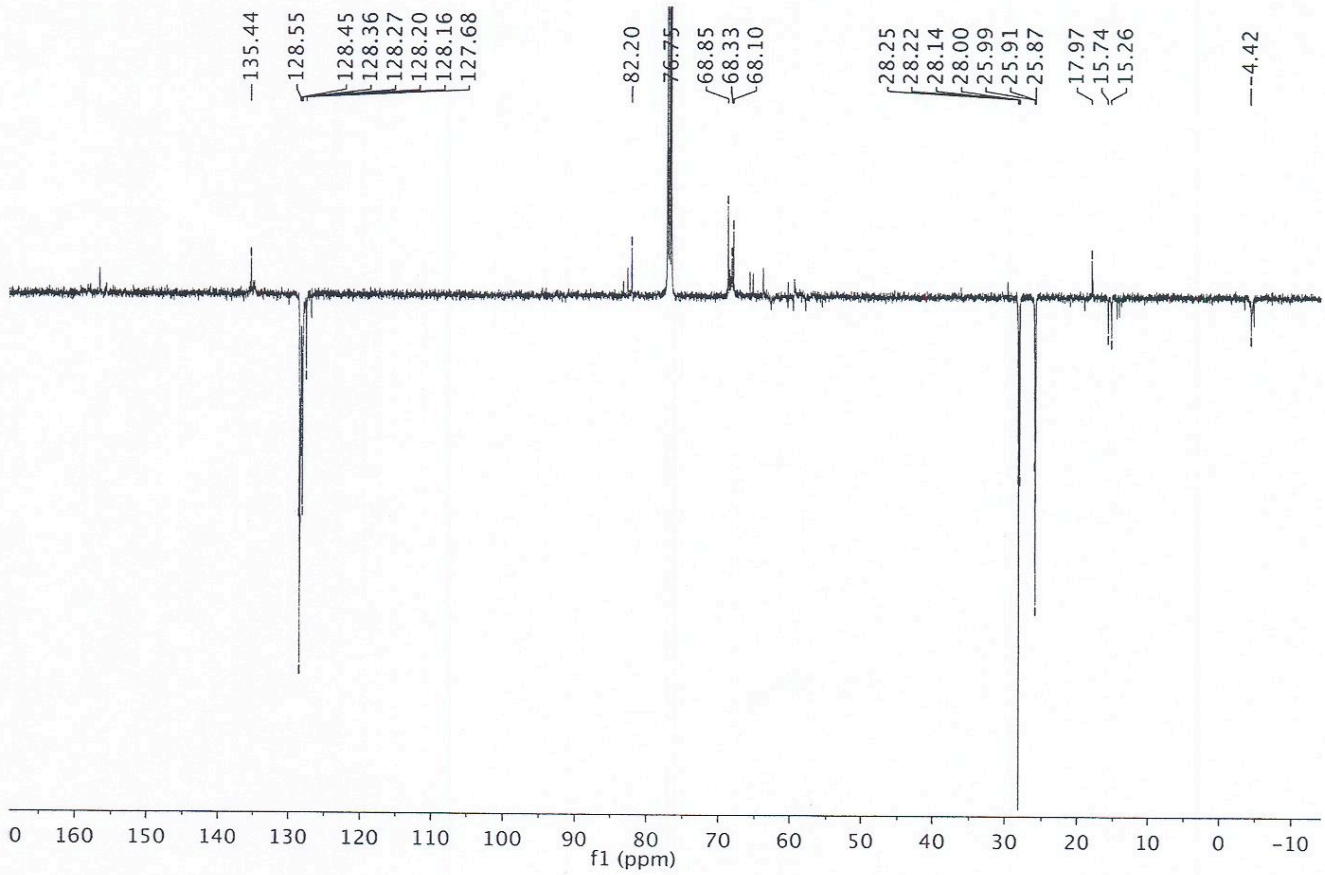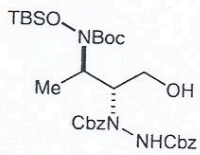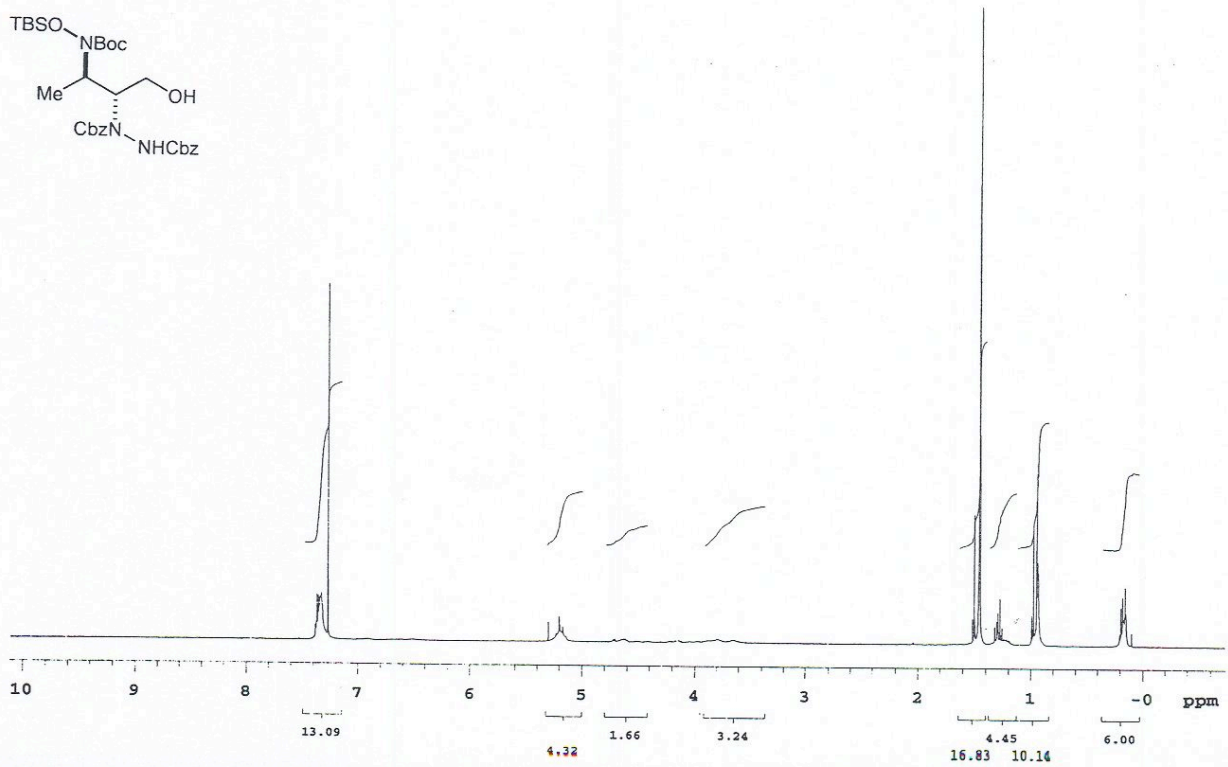

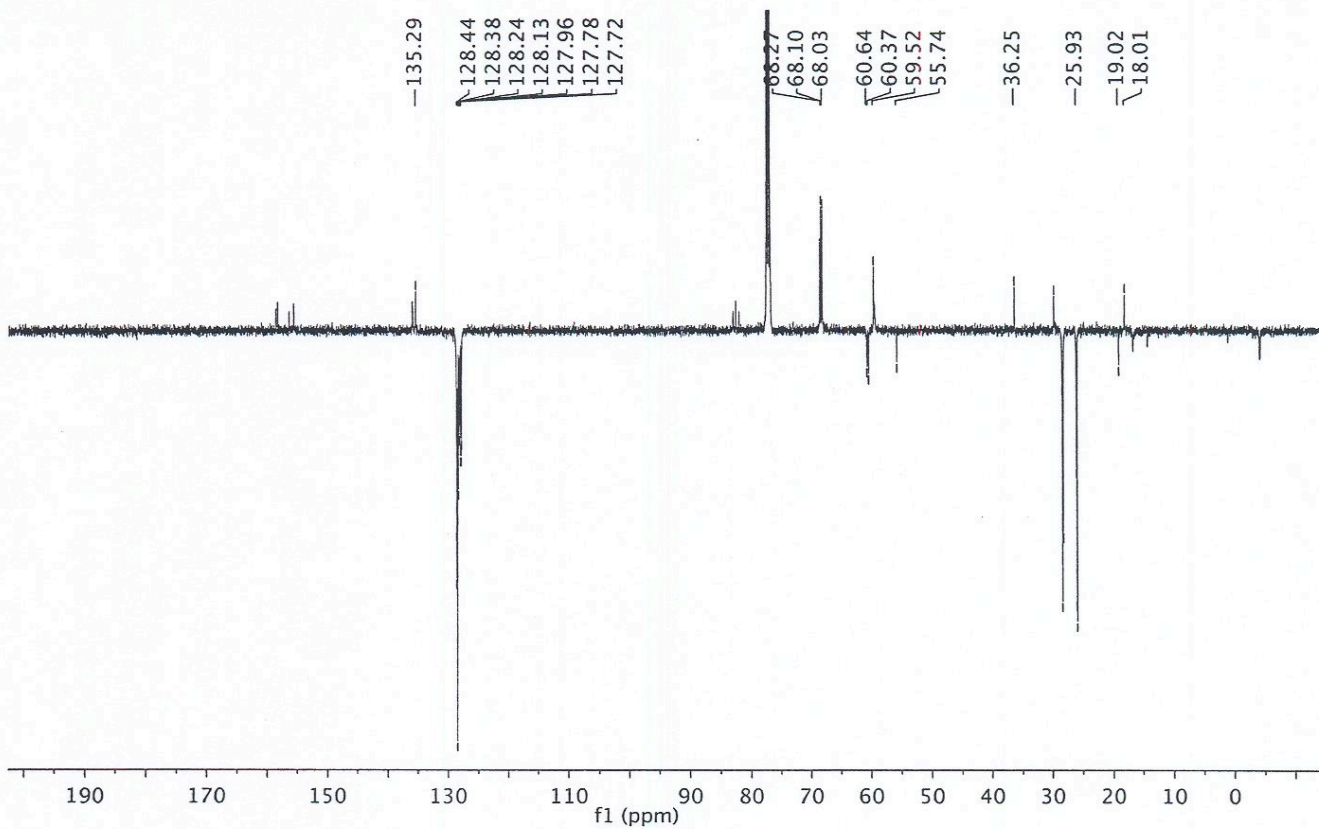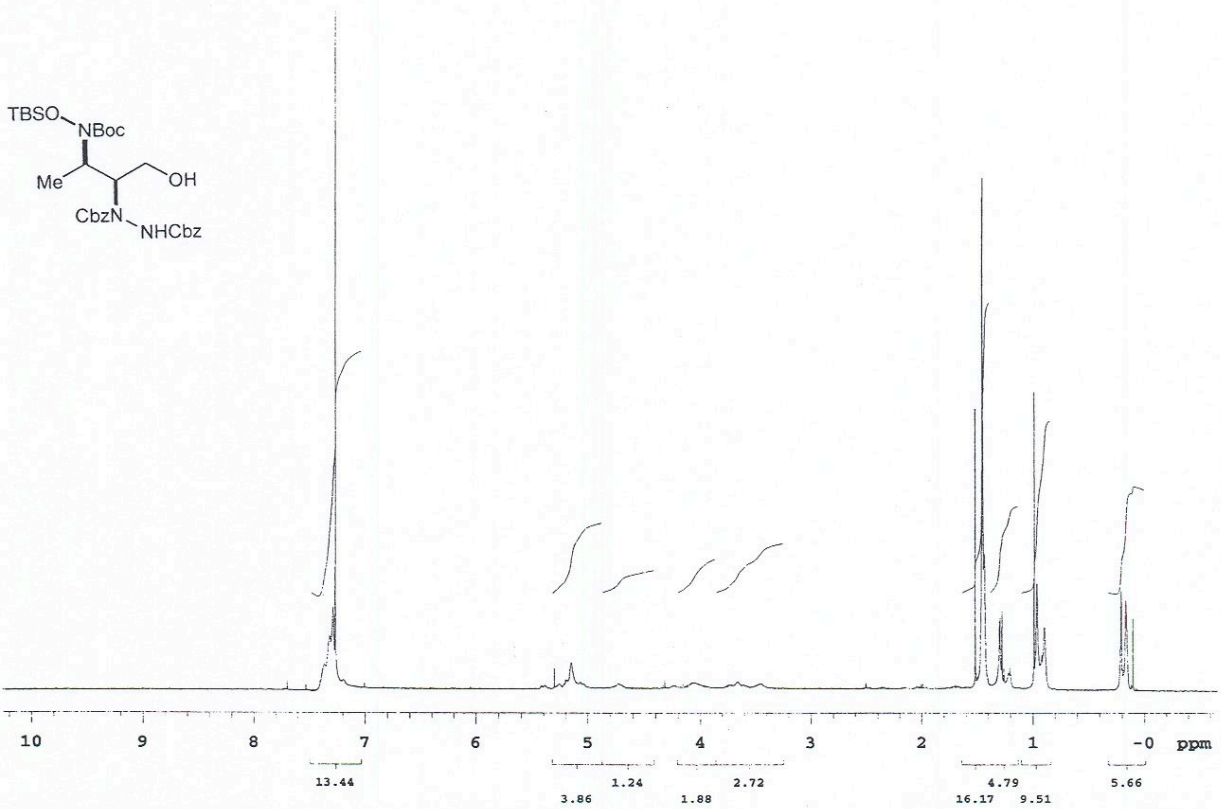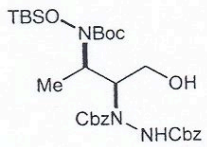



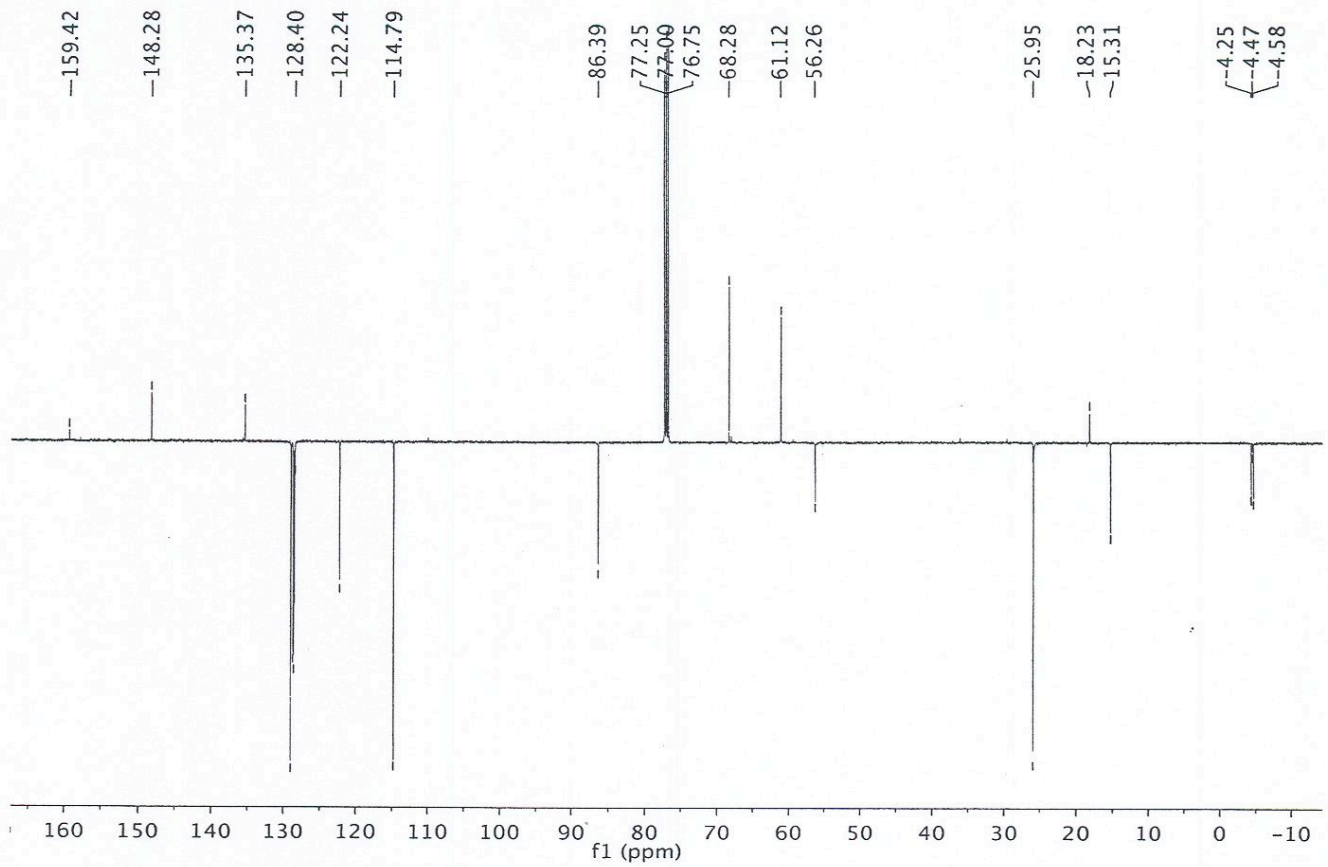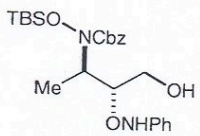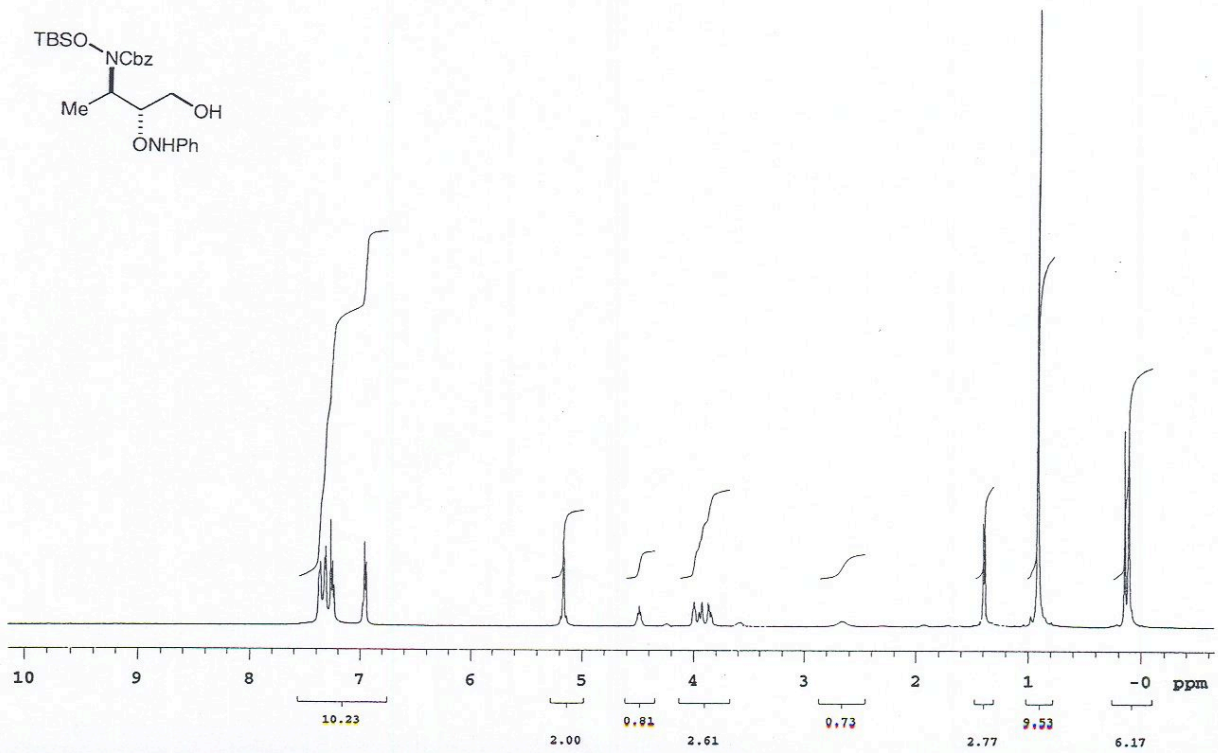

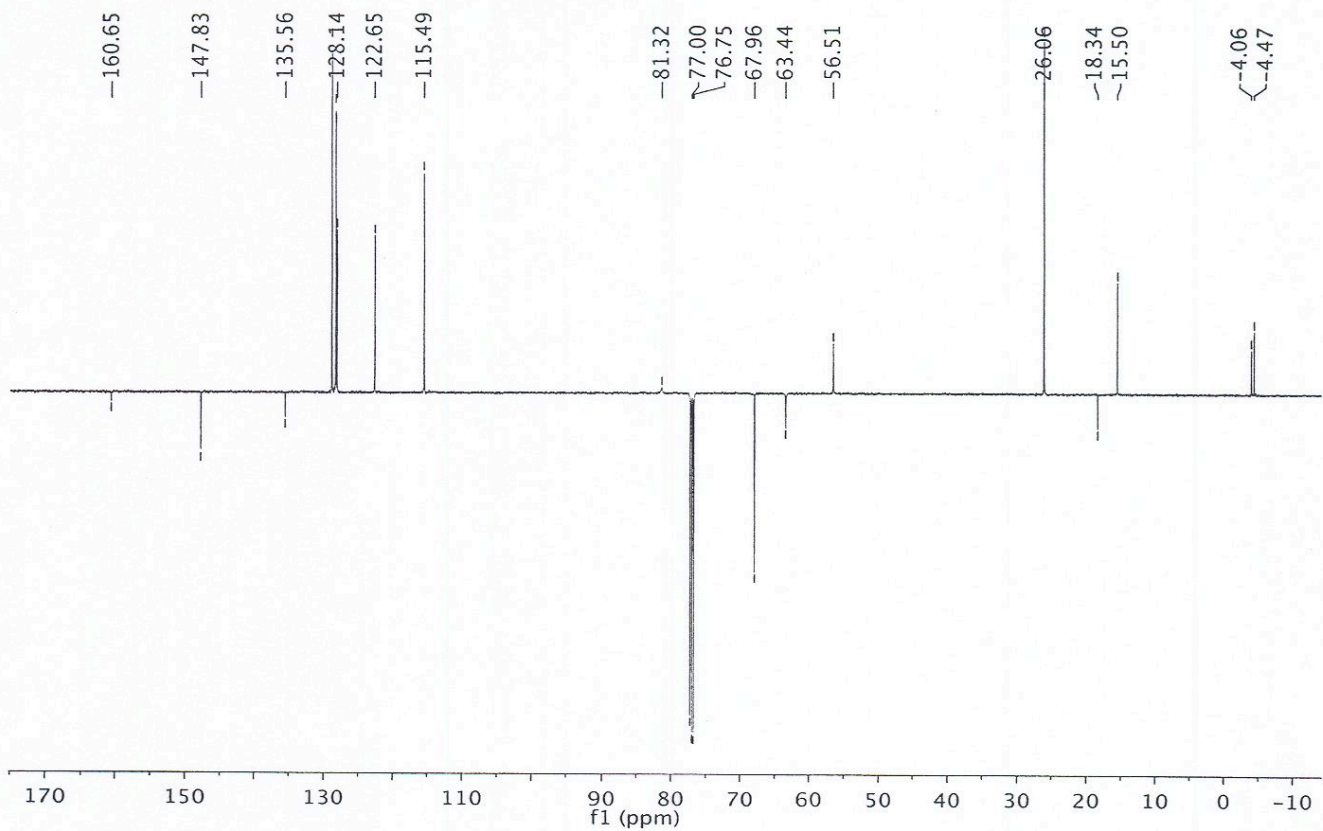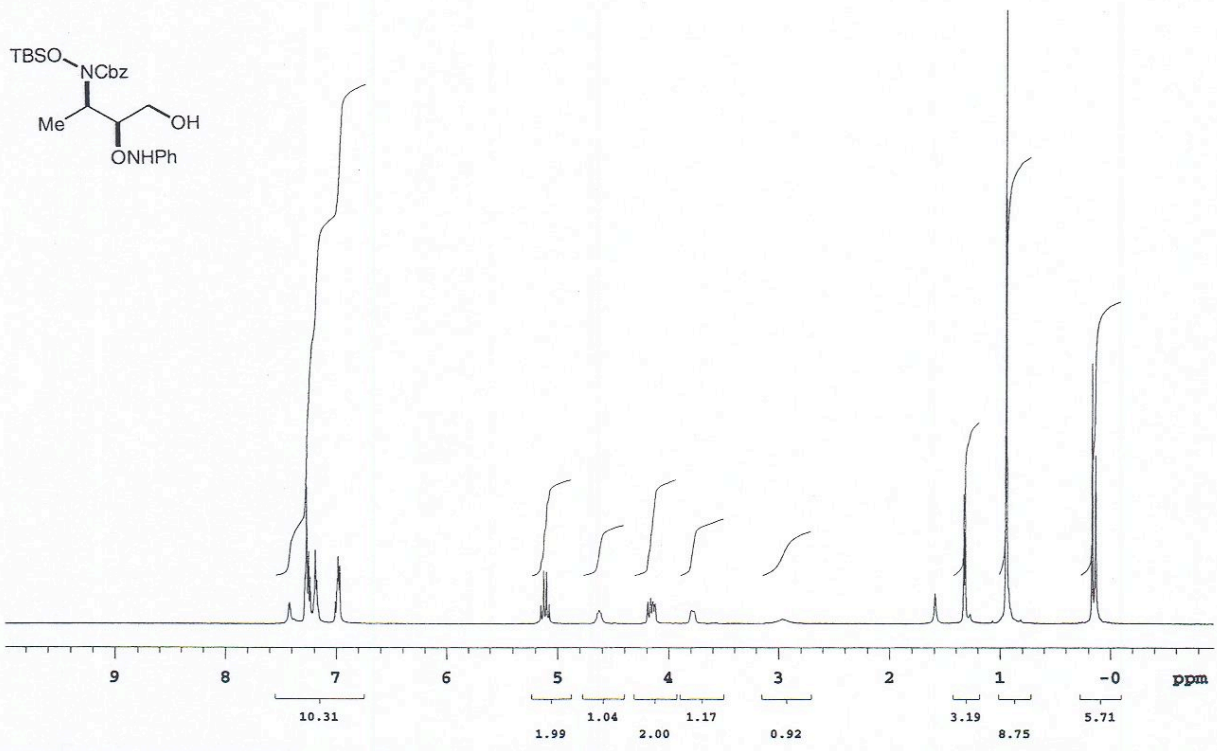



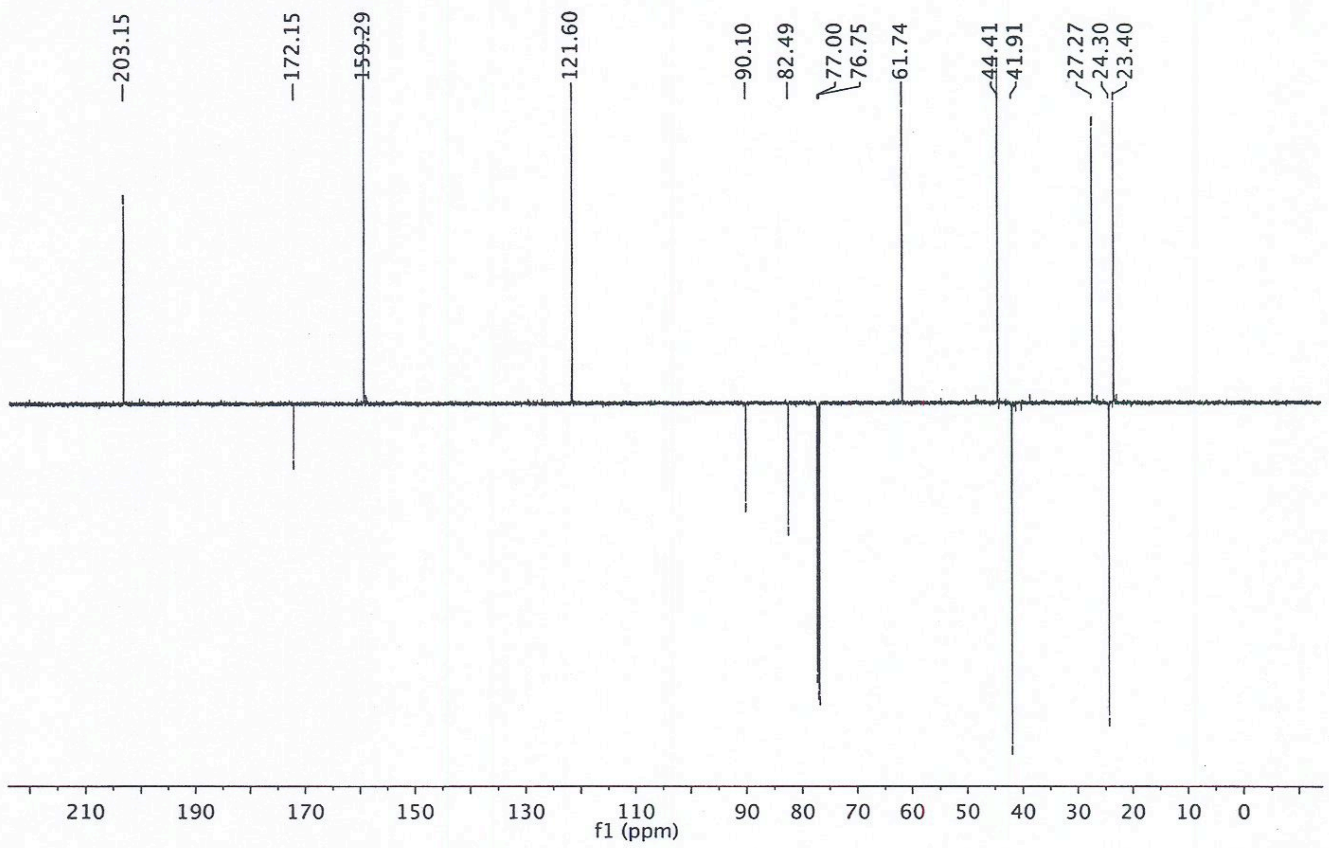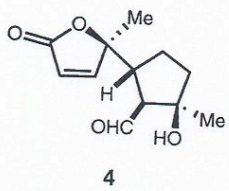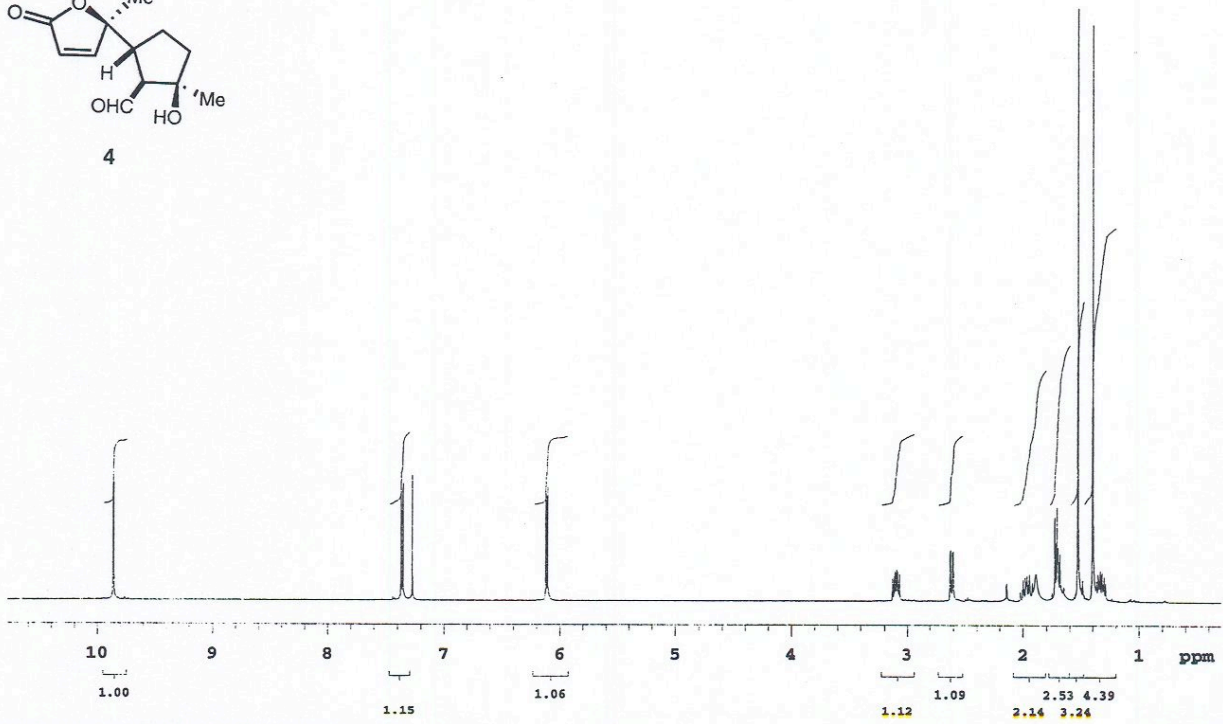

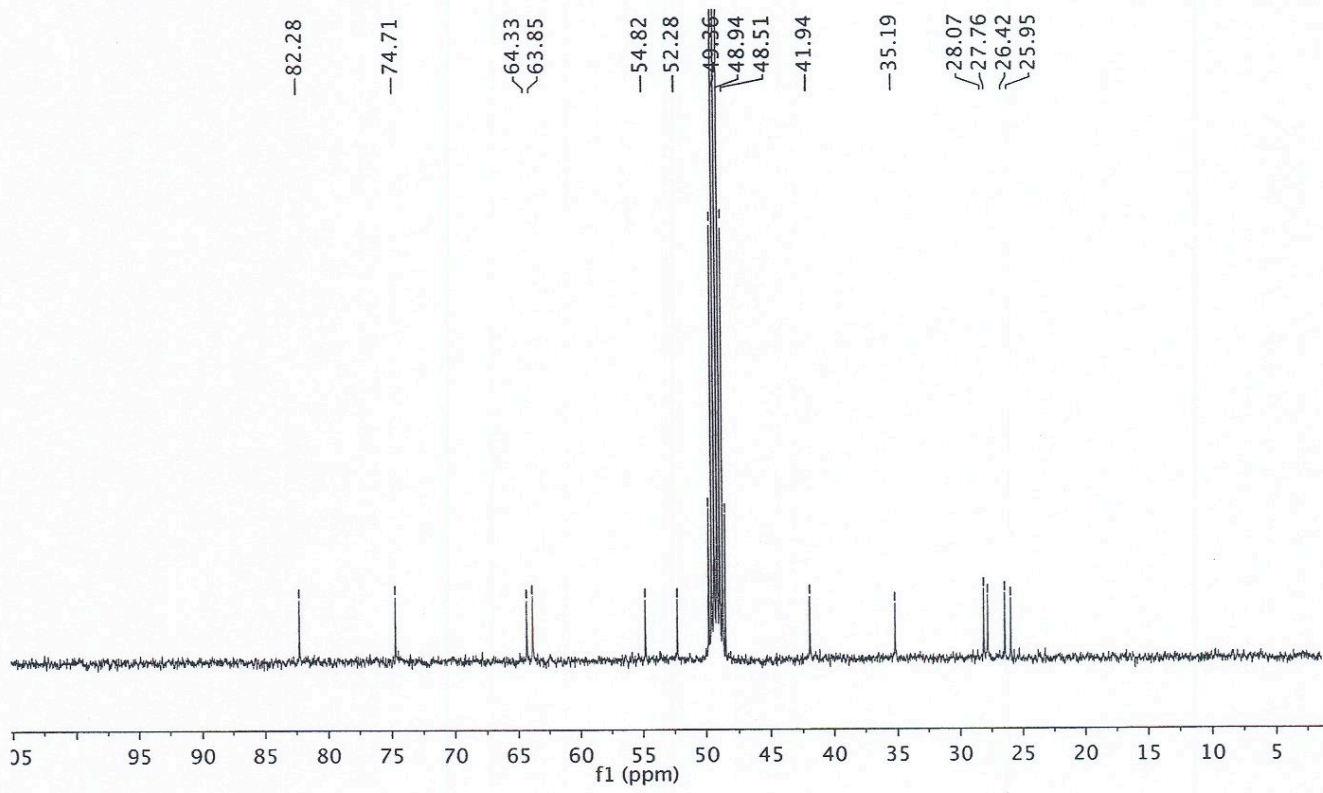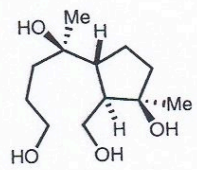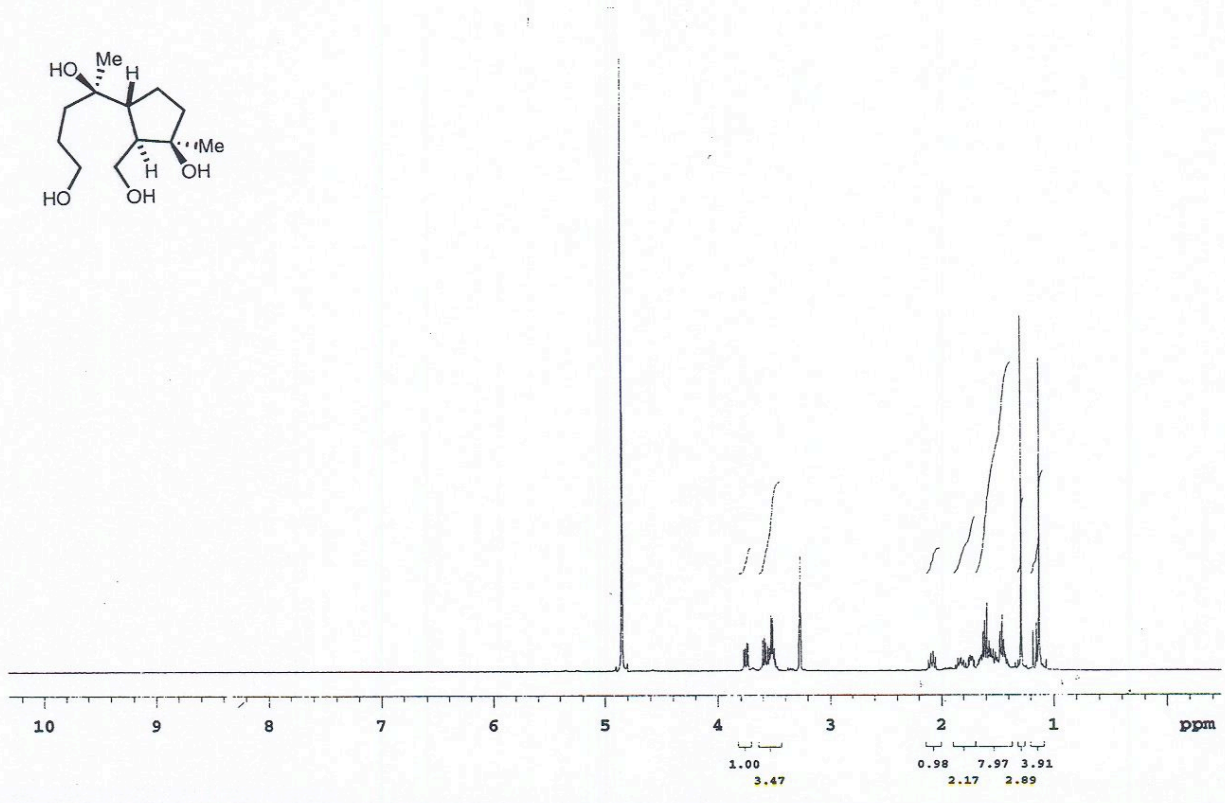

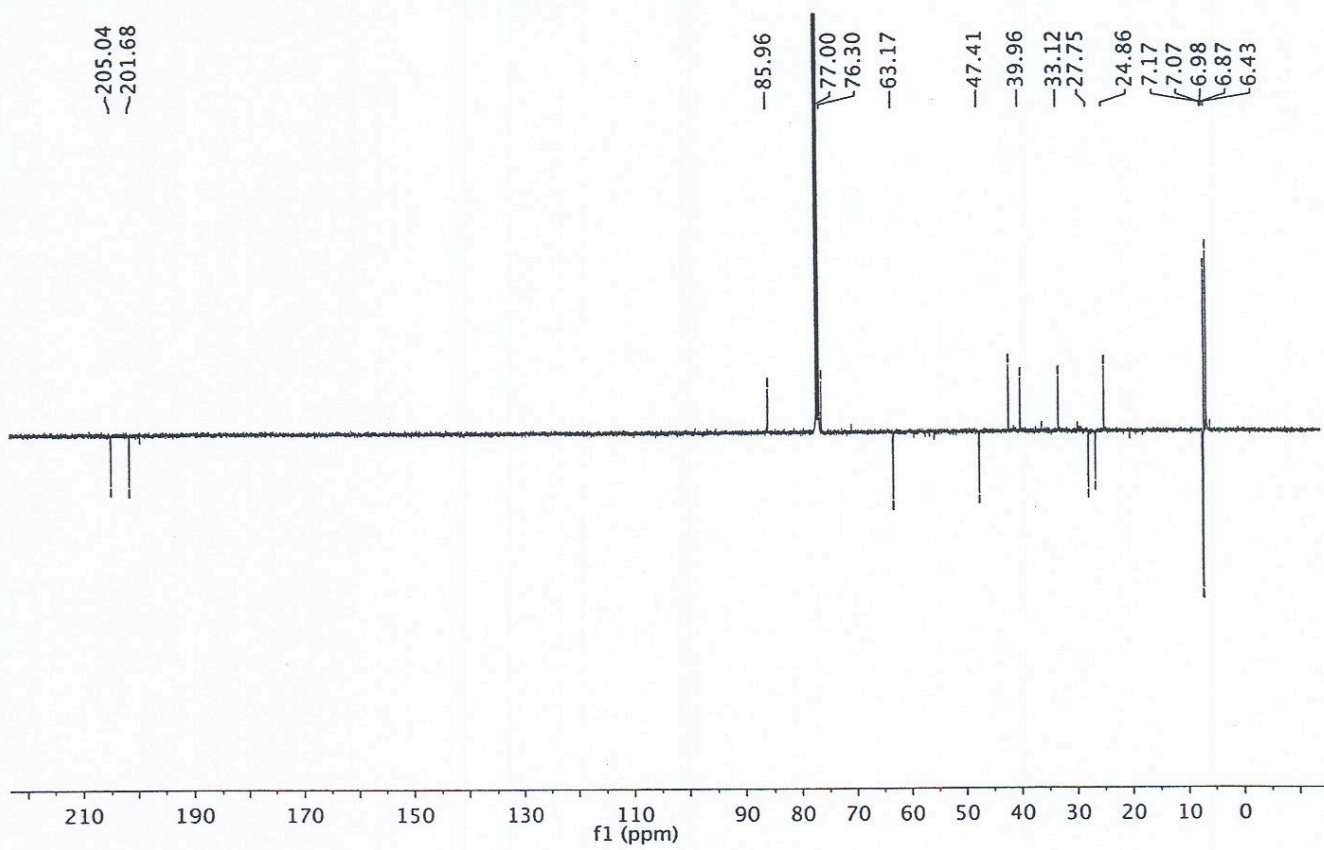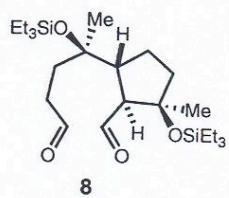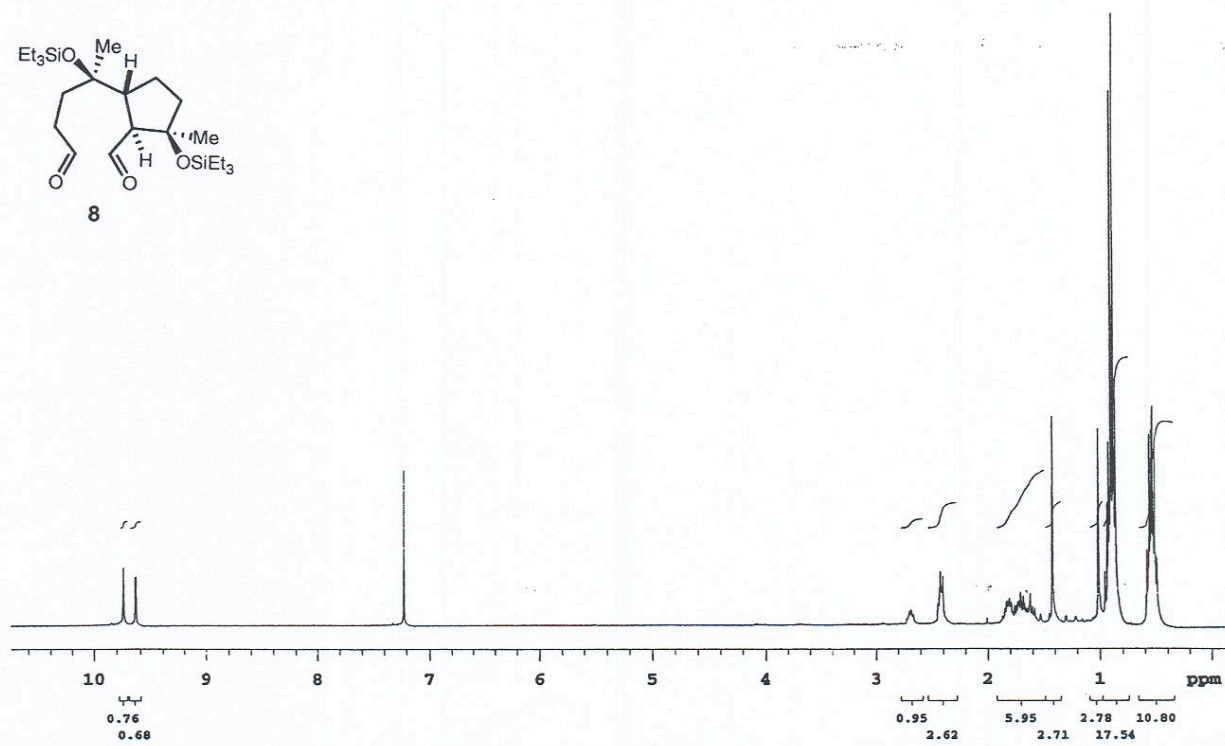



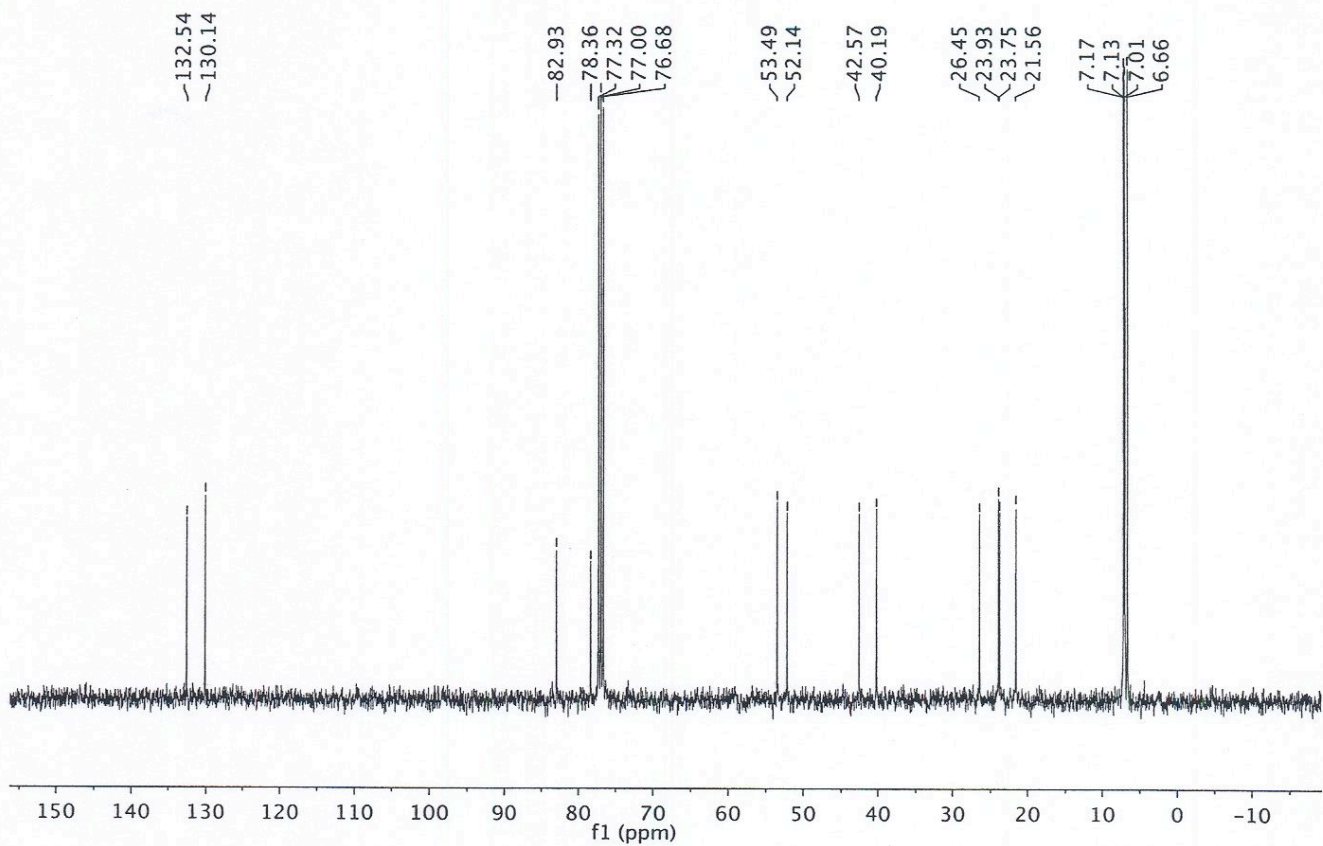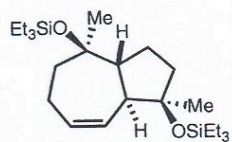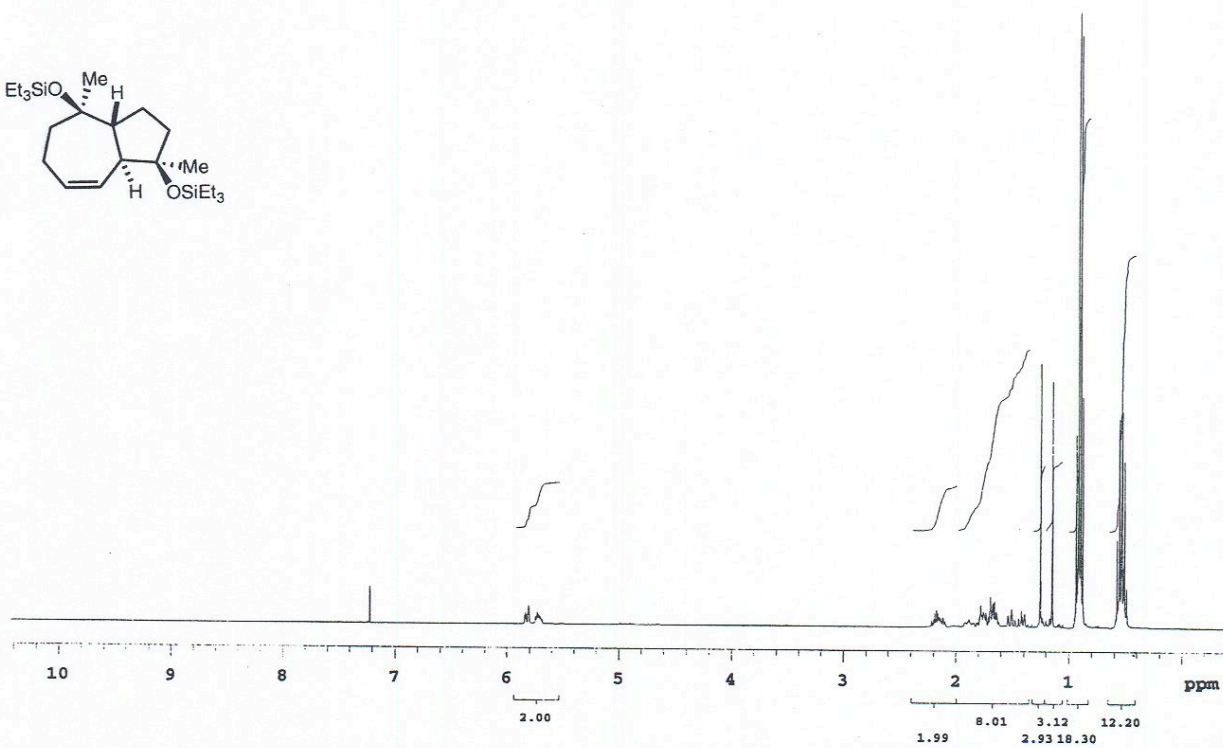

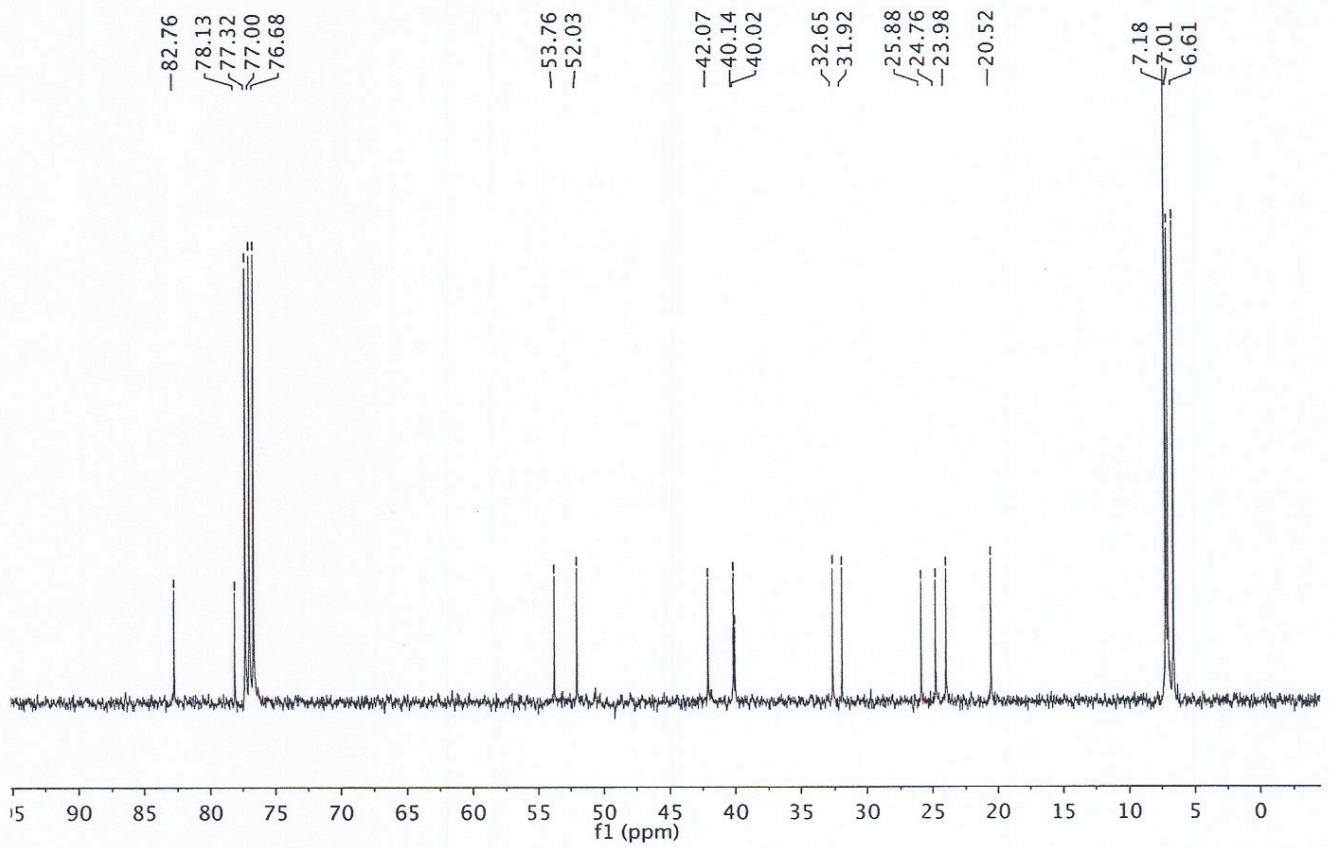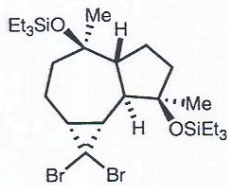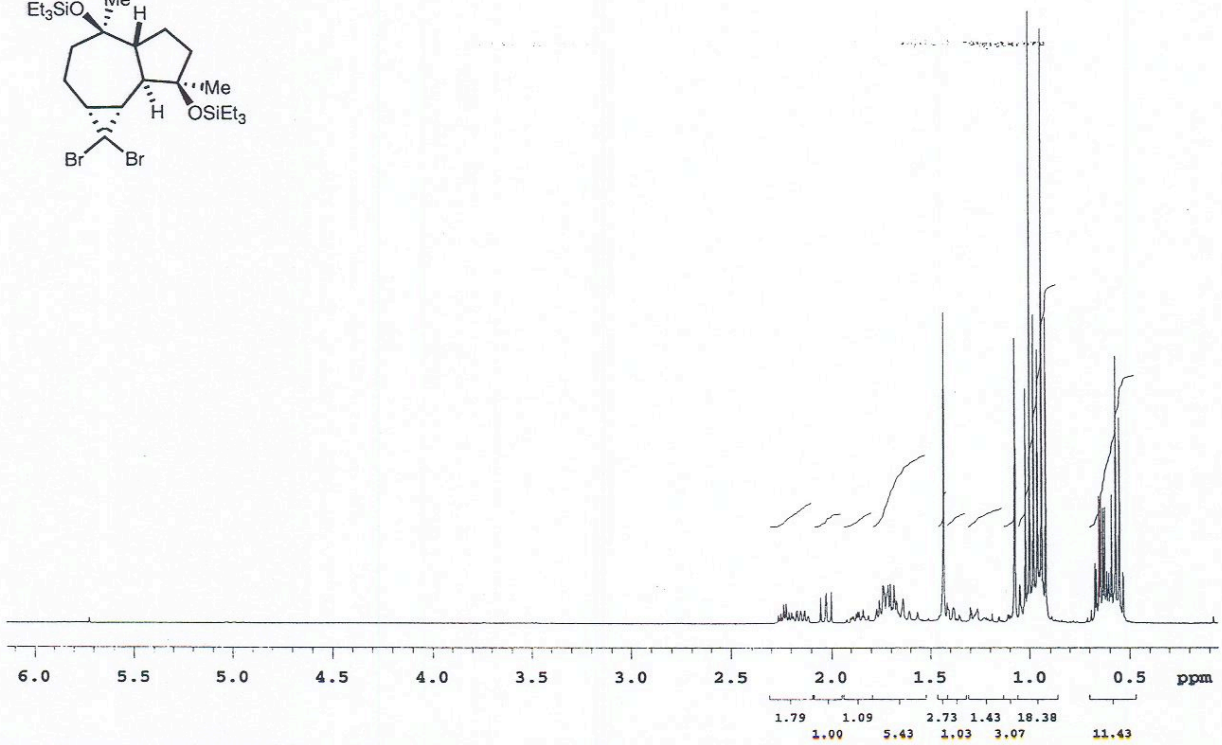

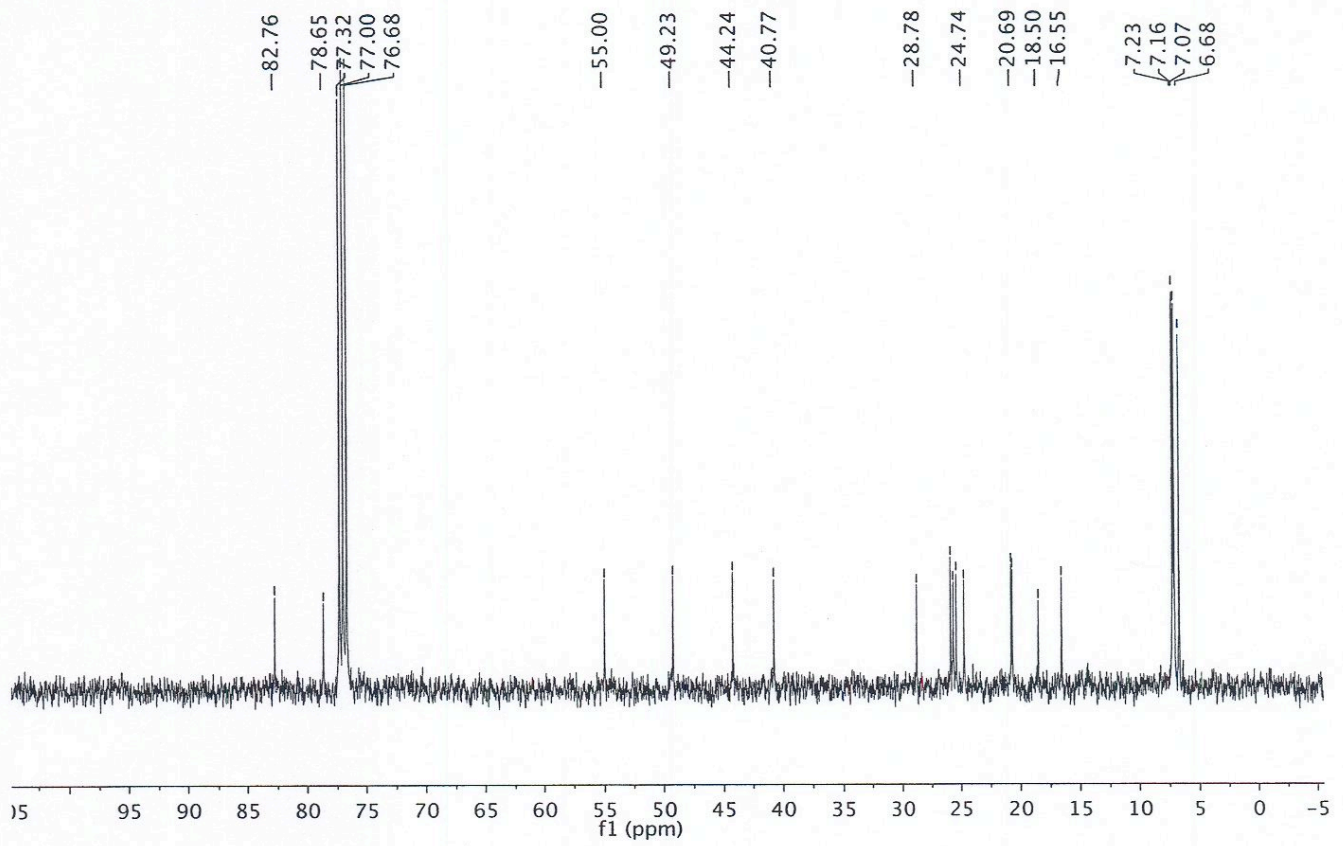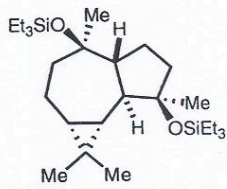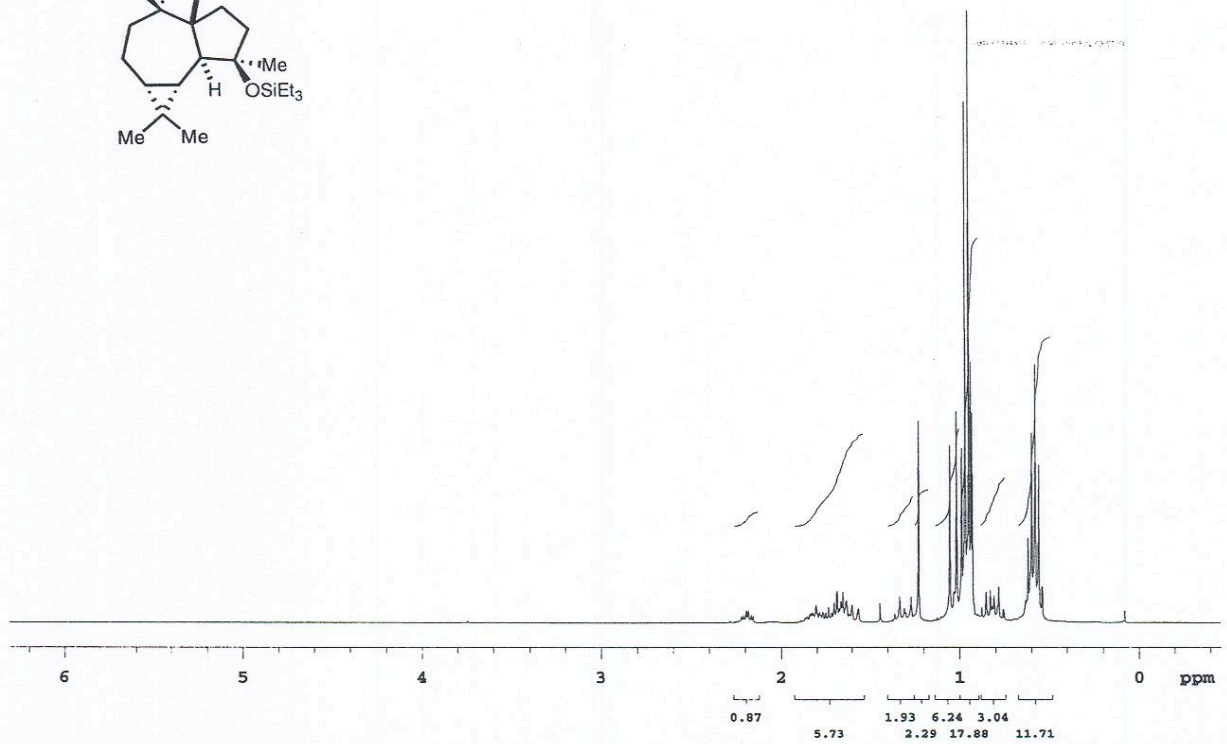



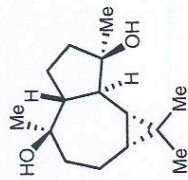

(-)-4α,7α-Aromadendranediol

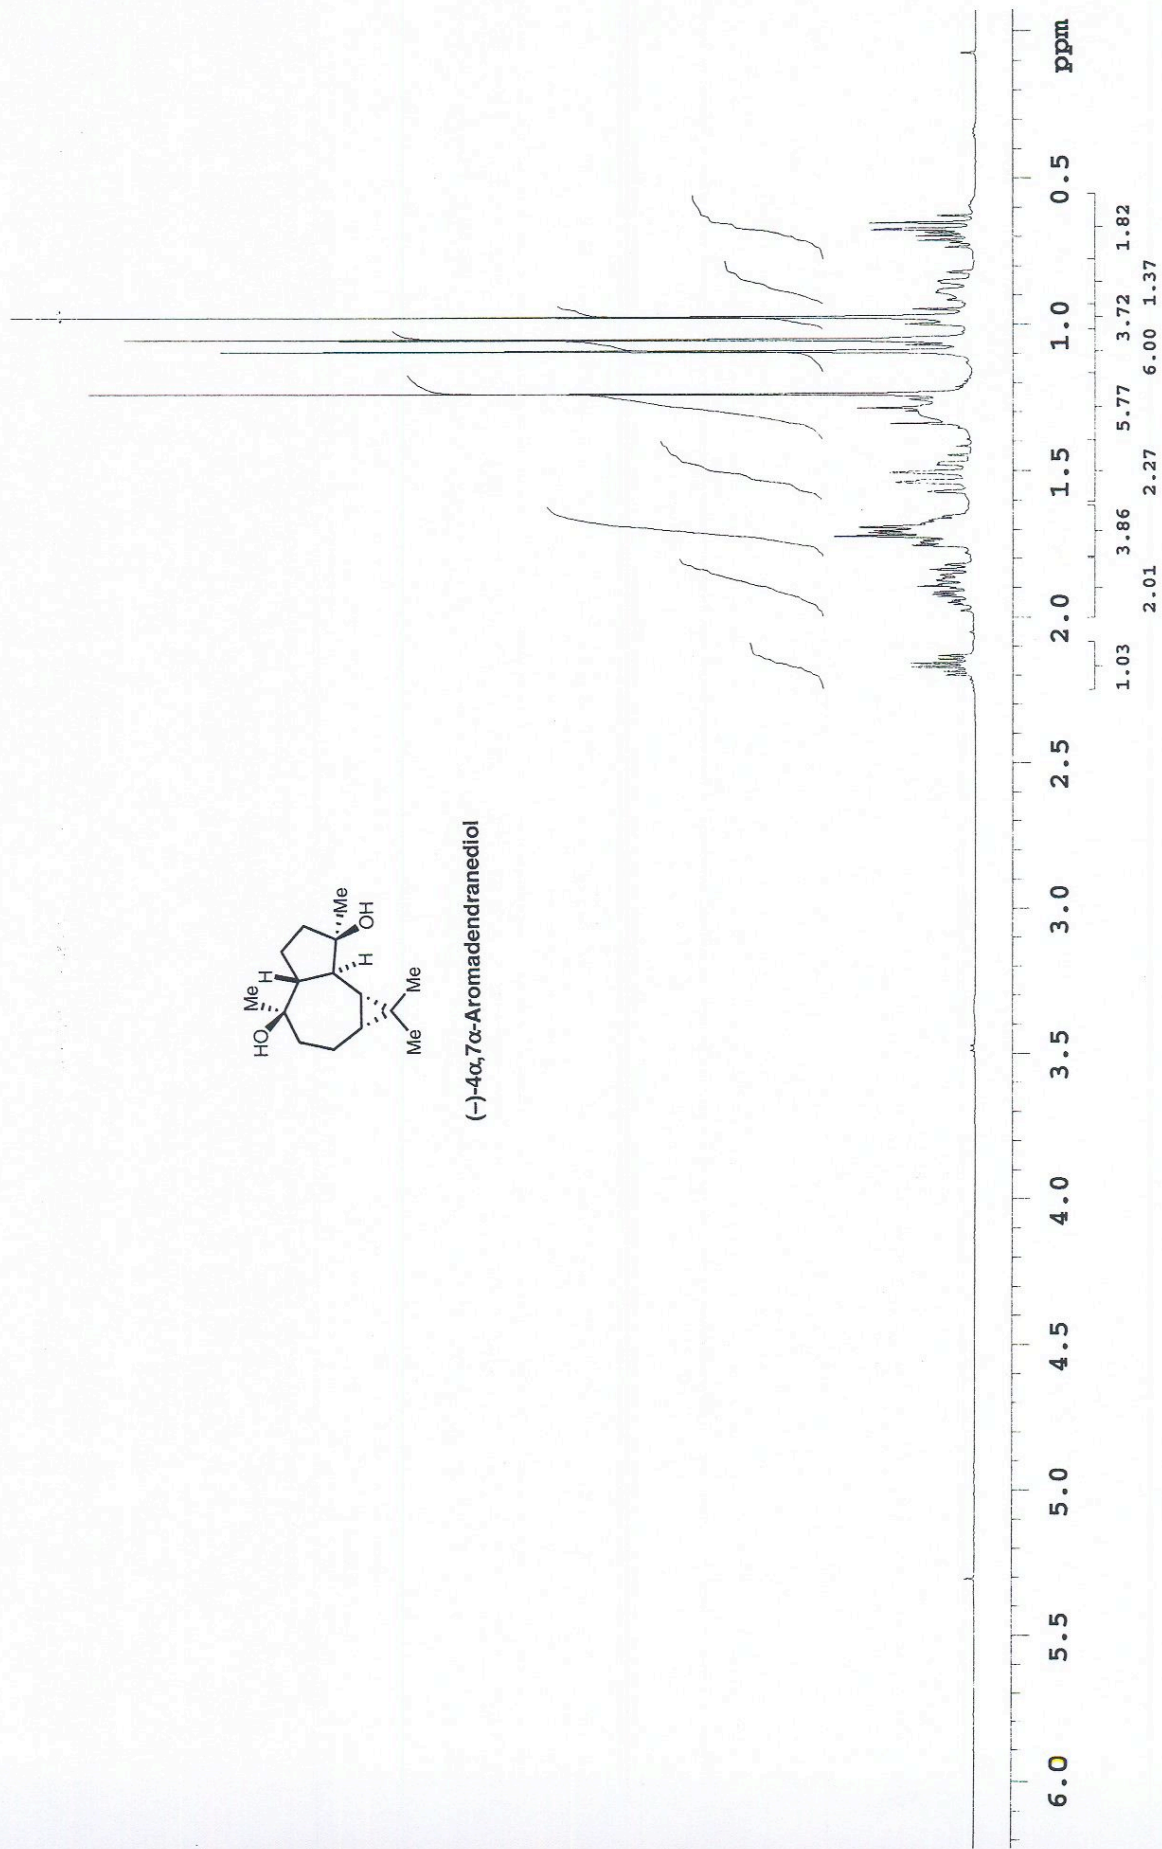

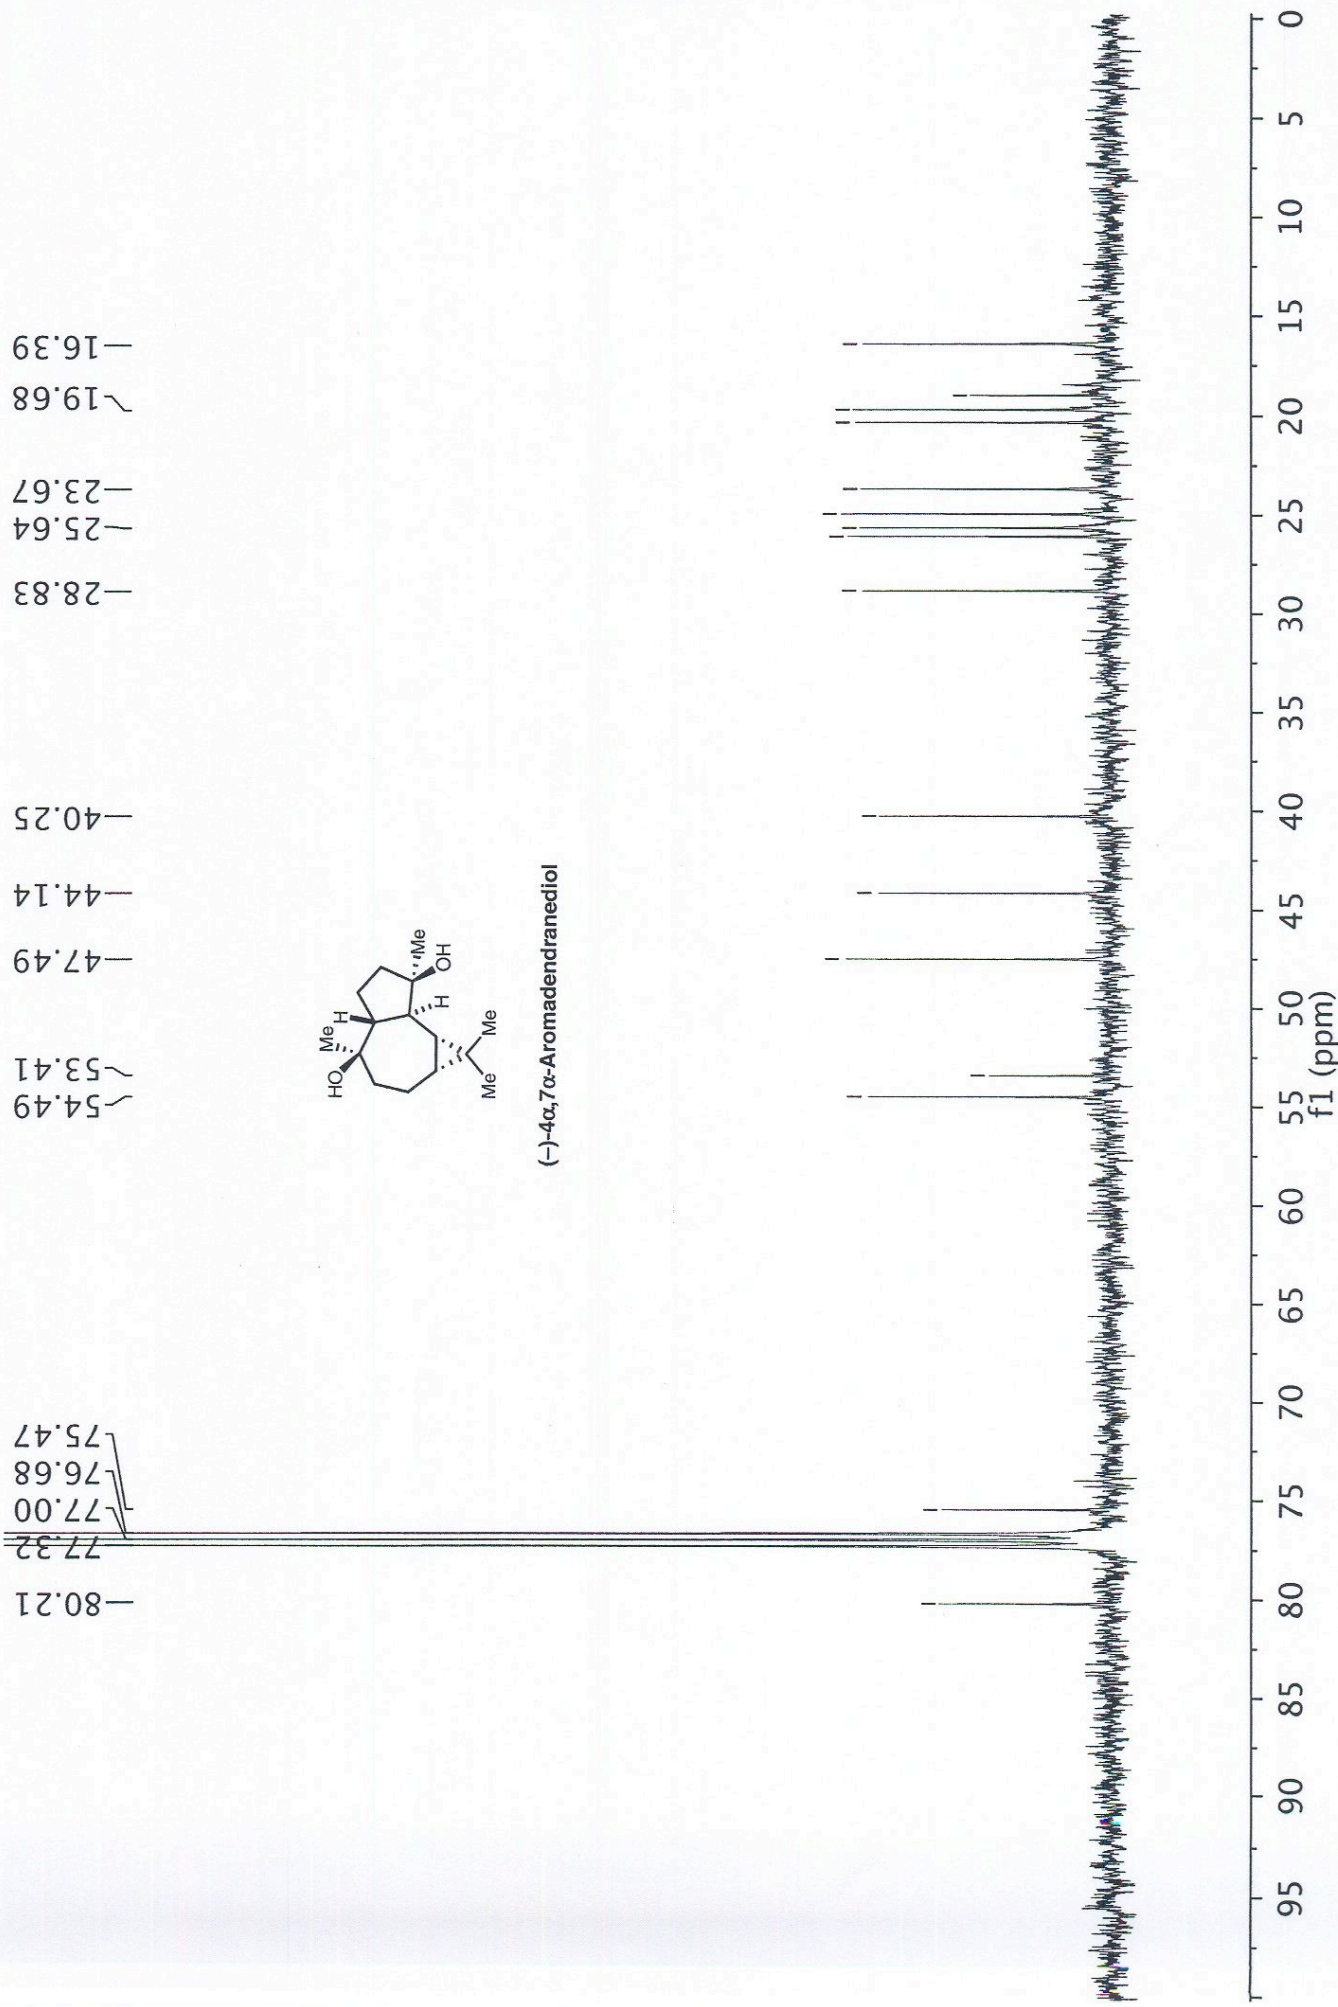



BergerSFC Chromatogram Report

Date: 2/28/2009  
 Time: 11:19:53 AM  
 Vial number: 9  
 Sequence name: bls2  
 Filename: bls2-86-41

Method Name: ADH\_MeOH\_5-50  
 User Name: SFC User  
 Acquisition Date: 3/4/2008 10:33:52 AM

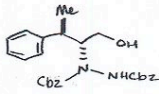

SAMPLE  
 SPIKED WITH  
 BOTH ANTI  
 ENANTIOMERS

Run Information:  
 N.A.

bls2-86-41:

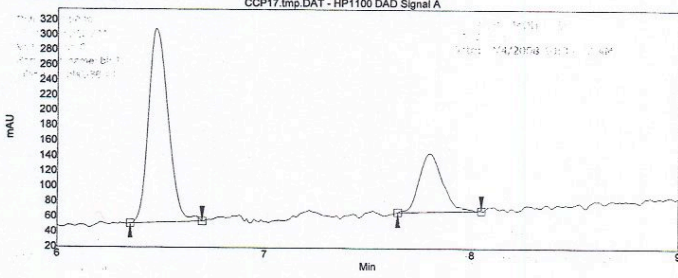

The Chromatogram Noise is 0

Results Table:

| Index | Name    | Start Time [Min] | End Time [Min] | RT Offset [Min] | Quantity [% Area] | Height [uV] | Area [uV.Min] | Area [%] |
|-------|---------|------------------|----------------|-----------------|-------------------|-------------|---------------|----------|
| 1     | UNKNOWN | 6.35             | 6.49           | 0.00            | 73.63             | 255.9       | 27.8          | 73.630   |
| 2     | UNKNOWN | 7.64             | 7.80           | 0.00            | 26.37             | 77.1        | 10.0          | 26.370   |
| Total |         |                  |                |                 | 100.00            | 333.0       | 37.8          | 100.000  |

BergerSFC Chromatogram Report

Date: 2/28/2009  
 Time: 11:25:28 AM  
 Vial number: 10  
 Sequence name: BLS6  
 Filename: bls3-86-D1

Method Name: ADH\_MeOH\_5-50  
 User Name: SFC User  
 Acquisition Date: 1/21/2008 10:22:35 PM

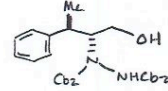

ANTI

Run Information:  
 N.A.

bls3-86-D1:

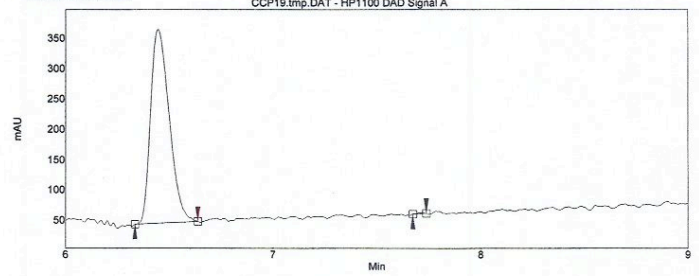

The Chromatogram Noise is 0

Results Table:

| Index | Name    | Start Time [Min] | End Time [Min] | RT Offset [Min] | Quantity [% Area] | Height [uV] | Area [uV.Min] | Area [%] |
|-------|---------|------------------|----------------|-----------------|-------------------|-------------|---------------|----------|
| 1     | UNKNOWN | 6.33             | 6.45           | 0.00            | 99.84             | 319.4       | 33.4          | 99.843   |
| 2     | UNKNOWN | 7.67             | 7.72           | 0.00            | 0.16              | 1.9         | 0.1           | 0.157    |
| Total |         |                  |                |                 | 100.00            | 321.3       | 33.4          | 100.000  |

99.8 % ee

BergerSFC Chromatogram Report

Date: 2/28/2009  
 Time: 11:02:21 AM  
 Vial number: 7  
 Sequence name: bls-1  
 Filename: bls3-86-21

Method Name: ADH\_MeOH\_5-50  
 User Name: SFC User  
 Acquisition Date: 3/4/2008 10:50:36 AM

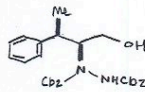

SAMPLE  
 SPIKED WITH  
 BOTH SYN  
 ENANTIOMERS

Run Information:  
 N.A.

bls3-86-21:

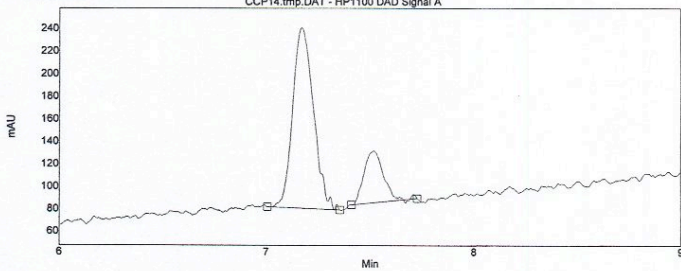

The Chromatogram Noise is 0

Results Table:

| Index | Name    | Start Time [Min] | End Time [Min] | RT Offset [Min] | Quantity [% Area] | Height [uV] | Area [uV.Min] | Area [%] |
|-------|---------|------------------|----------------|-----------------|-------------------|-------------|---------------|----------|
| 1     | UNKNOWN | 7.01             | 7.17           | 0.00            | 78.53             | 159.9       | 18.4          | 78.528   |
| 2     | UNKNOWN | 7.41             | 7.52           | 0.00            | 21.47             | 46.1        | 5.0           | 21.472   |
| Total |         |                  |                |                 | 100.00            | 206.0       | 23.5          | 100.000  |

BergerSFC Chromatogram Report

Date: 2/28/2009  
 Time: 11:50:46 AM  
 Vial number: 11  
 Sequence name: bls2  
 Filename: bls2-86-D21

Method Name: ADH\_MeOH\_5-50  
 User Name: SFC User  
 Acquisition Date: 1/21/2008 10:49:30 PM

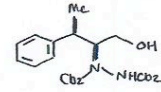

SYN

Run Information:  
 N.A.

bls2-86-D21:

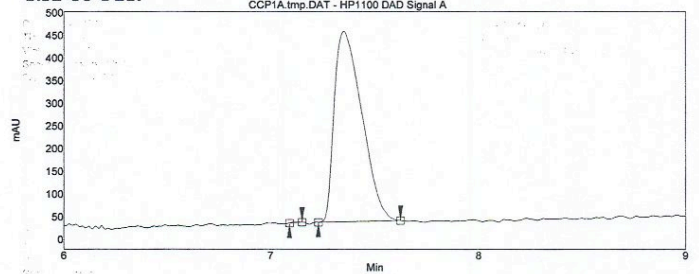

The Chromatogram Noise is 0

Results Table:

| Index | Name    | Start Time [Min] | End Time [Min] | RT Offset [Min] | Quantity [% Area] | Height [uV] | Area [uV.Min] | Area [%] |
|-------|---------|------------------|----------------|-----------------|-------------------|-------------|---------------|----------|
| 2     | UNKNOWN | 7.09             | 7.11           | 0.00            | 0.09              | 1.9         | 0.1           | 0.088    |
| 1     | UNKNOWN | 7.23             | 7.35           | 0.00            | 99.91             | 419.7       | 64.0          | 99.912   |
| Total |         |                  |                |                 | 100.00            | 421.6       | 64.0          | 100.000  |

99.8 % ee

BergerSFC Chromatogram Report

Date: 2/28/2009  
 Time: 7:49:29 PM  
 Vial number: 5  
 Sequence name: BLS4  
 Filename: BLS2-H20-RL-racOJH9

Method Name: OJH\_MeOH\_5-10  
 User Name: Administrator  
 Acquisition Date: 2/5/2009 3:55:12 PM

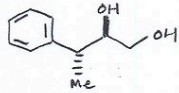

SAMPLE SPIKED  
 w/ BOTH  
ANTI  
 ENANTIOMERS

Run Information:  
 N.A.

BLS2-H20-RL-racOJH9:

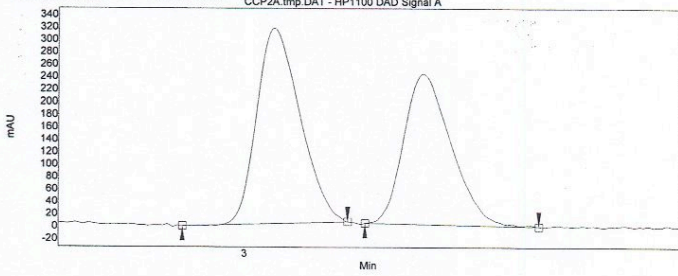

The Chromatogram Noise is 0

Results Table:

| Index | Name    | Start Time [Min] | End Time [Min] | RT Offset [Min] | Quantity [% Area] | Height [uV] | Area [uV.Min] | Area [%] |
|-------|---------|------------------|----------------|-----------------|-------------------|-------------|---------------|----------|
| 1     | UNKNOWN | 2.90             | 3.05           | 3.17            | 0.00              | 54.62       | 313.8         | 25.4     |
| 2     | UNKNOWN | 3.19             | 3.29           | 3.47            | 0.00              | 45.38       | 241.3         | 21.1     |
| Total |         |                  |                |                 | 100.00            | 555.1       | 46.6          | 100.000  |

BergerSFC Chromatogram Report

Date: 2/28/2009  
 Time: 7:51:18 PM  
 Vial number: 3  
 Sequence name: BLS4  
 Filename: BLS2-H20-RL-OJH11

Method Name: OJH\_MeOH\_5-10  
 User Name: SFC User  
 Acquisition Date: 2/5/2009 5:11:57 PM

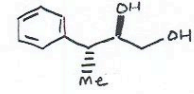

ANTI

Run Information:  
 N.A.

BLS2-H20-RL-OJH11:

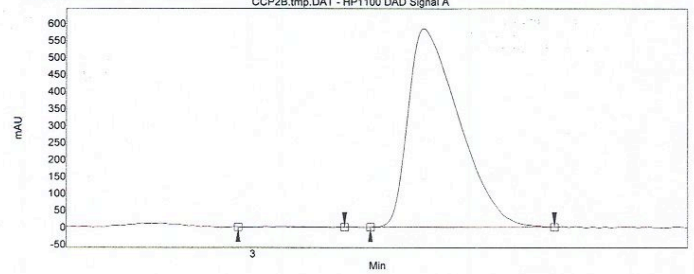

The Chromatogram Noise is 0

Results Table:

| Index | Name    | Start Time [Min] | End Time [Min] | RT Offset [Min] | Quantity [% Area] | Height [uV] | Area [uV.Min] | Area [%] |
|-------|---------|------------------|----------------|-----------------|-------------------|-------------|---------------|----------|
| 1     | UNKNOWN | 2.98             | 3.02           | 3.15            | 0.00              | 0.15        | 1.7           | 0.1      |
| 2     | UNKNOWN | 3.19             | 3.28           | 3.48            | 0.00              | 99.85       | 584.9         | 55.3     |
| Total |         |                  |                |                 | 100.00            | 586.6       | 55.4          | 100.000  |

99.7% ee

BergerSFC Chromatogram Report

Date: 2/28/2009  
 Time: 8:09:00 PM  
 Vial number: 2  
 Sequence name: BLS10  
 Filename: BLS2-H20-SL10

Method Name: ADH\_MeOH\_5-10  
 User Name: SFC User  
 Acquisition Date: 2/5/2009 12:59:42 PM

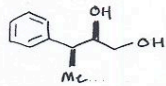

OTHER  
 ENANTIOMER  
 (2R,3S)-SYN

Run Information:  
 N.A.

BLS2-H20-SL10:

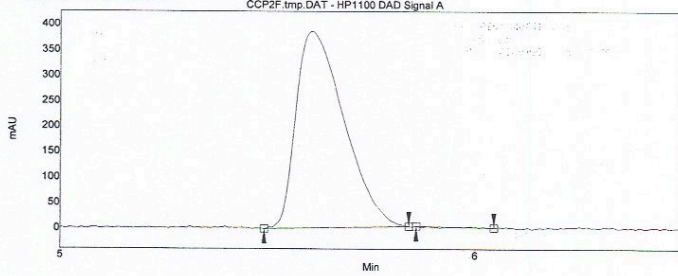

The Chromatogram Noise is 0

Results Table:

| Index | Name    | Start Time [Min] | End Time [Min] | RT Offset [Min] | Quantity [% Area] | Height [uV] | Area [uV.Min] | Area [%] |
|-------|---------|------------------|----------------|-----------------|-------------------|-------------|---------------|----------|
| 1     | UNKNOWN | 5.49             | 5.61           | 5.84            | 0.00              | 99.83       | 385.2         | 51.3     |
| 2     | UNKNOWN | 5.86             | 5.92           | 6.05            | 0.00              | 0.17        | 2.7           | 0.1      |
| Total |         |                  |                |                 | 100.00            | 387.8       | 51.4          | 100.000  |

99.6% ee

BergerSFC Chromatogram Report

Date: 2/28/2009  
 Time: 8:08:13 PM  
 Vial number: 1  
 Sequence name: BLS2  
 Filename: BLS2-H20-RD7

Method Name: ADH\_Solv4\_5-10  
 User Name: SFC User  
 Acquisition Date: 2/5/2009 11:03:36 AM

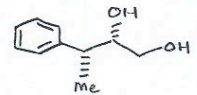

(2S,3R)-SYN

Run Information:  
 N.A.

BLS2-H20-RD7:

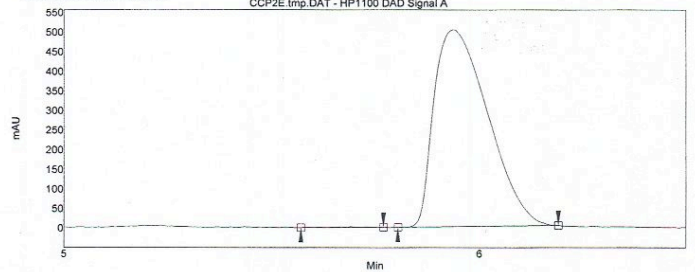

The Chromatogram Noise is 0

Results Table:

| Index | Name    | Start Time [Min] | End Time [Min] | RT Offset [Min] | Quantity [% Area] | Height [uV] | Area [uV.Min] | Area [%] |
|-------|---------|------------------|----------------|-----------------|-------------------|-------------|---------------|----------|
| 2     | UNKNOWN | 5.57             | 5.69           | 5.77            | 0.00              | 0.25        | 2.1           | 0.2      |
| 1     | UNKNOWN | 5.80             | 5.94           | 6.19            | 0.00              | 99.75       | 502.9         | 75.5     |
| Total |         |                  |                |                 | 100.00            | 505.0       | 75.7          | 100.000  |

99.5% ee



BergerSFC Chromatogram Report

Date: 2/28/2009  
 Time: 8:36:32 PM  
 Vial number: 4  
 Sequence name: BLS14  
 Filename: BLS2-rmSDC5

Method Name: OJH\_Solv4\_5-10  
 User Name: SFC User  
 Acquisition Date: 1/30/2009 2:22:14 AM

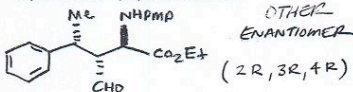

Run Information:  
 N.A.

BLS2-rmSDC5:

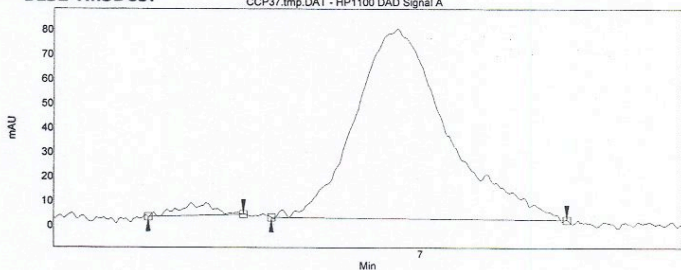

The Chromatogram Noise is 0

Results Table:

| Index | Name    | Start [Min] | Time [Min] | End [Min] | RT Offset [Min] | Quantity [% Area] | Height [uV] | Area [uV.Min] | Area [%] |
|-------|---------|-------------|------------|-----------|-----------------|-------------------|-------------|---------------|----------|
| 1     | UNKNOWN | 6.48        | 6.56       | 6.66      | 0.00            | 2.44              | 5.1         | 0.4           | 2.439    |
| 2     | UNKNOWN | 6.72        | 6.96       | 7.28      | 0.00            | 97.56             | 77.5        | 15.7          | 97.561   |
| Total |         |             |            |           |                 | 100.00            | 82.6        | 16.1          | 100.000  |

97.5 % ee

BergerSFC Chromatogram Report

Date: 2/28/2009  
 Time: 8:37:02 PM  
 Vial number: 2  
 Sequence name: BLS10  
 Filename: BLS2-rmRLC5

Method Name: OJH\_MeOH\_5-10  
 User Name: SFC User  
 Acquisition Date: 1/30/2009 1:48:49 AM

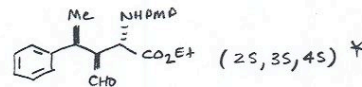

Run Information:  
 N.A.

BLS2-rmRLC5:

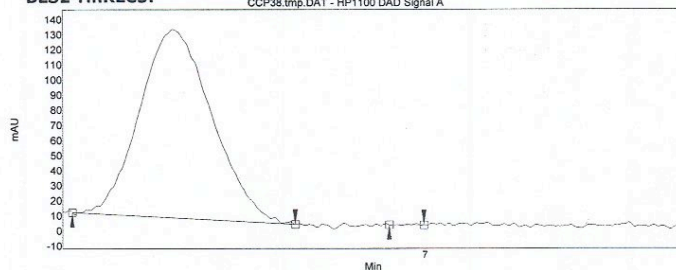

The Chromatogram Noise is 0

Results Table:

| Index | Name    | Start [Min] | Time [Min] | End [Min] | RT Offset [Min] | Quantity [% Area] | Height [uV] | Area [uV.Min] | Area [%] |
|-------|---------|-------------|------------|-----------|-----------------|-------------------|-------------|---------------|----------|
| 1     | UNKNOWN | 6.32        | 6.51       | 6.75      | 0.00            | 100.00            | 124.8       | 20.2          | 99.996   |
| 2     | UNKNOWN | 6.93        | 6.98       | 7.00      | 0.00            | 0.00              | 0.8         | 0.0           | 0.004    |
| Total |         |             |            |           |                 | 100.00            | 125.6       | 20.2          | 100.000  |

99.9 % ee

BergerSFC Chromatogram Report

Date: 2/28/2009  
 Time: 8:14:30 PM  
 Vial number: 5  
 Sequence name: BLS16  
 Filename: BLS2-rmRDrac6

Method Name: OJH\_MeOH\_5-10  
 User Name: SFC User  
 Acquisition Date: 1/30/2009 10:30:06 AM

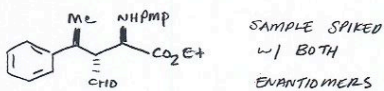

Run Information:  
 N.A.

BLS2-rmRDrac6:

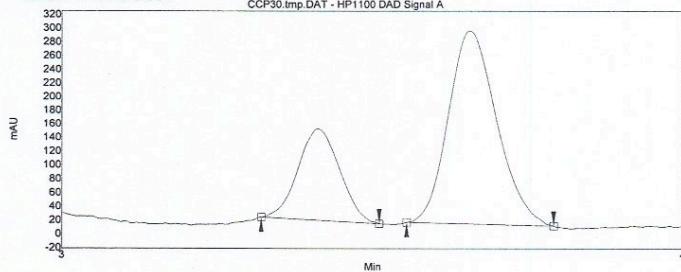

The Chromatogram Noise is 0

Results Table:

| Index | Name    | Start [Min] | Time [Min] | End [Min] | RT Offset [Min] | Quantity [% Area] | Height [uV] | Area [uV.Min] | Area [%] |
|-------|---------|-------------|------------|-----------|-----------------|-------------------|-------------|---------------|----------|
| 1     | UNKNOWN | 3.32        | 3.41       | 3.51      | 0.00            | 28.89             | 132.4       | 10.2          | 28.893   |
| 2     | UNKNOWN | 3.56        | 3.66       | 3.79      | 0.00            | 71.11             | 281.0       | 25.1          | 71.107   |
| Total |         |             |            |           |                 | 100.00            | 413.4       | 35.3          | 100.000  |

BergerSFC Chromatogram Report

Date: 2/28/2009  
 Time: 8:16:30 PM  
 Vial number: 2  
 Sequence name: BLS10  
 Filename: BLS2-rmD2C3

Method Name: OJH\_MeOH\_5-10  
 User Name: SFC User  
 Acquisition Date: 1/30/2009 12:07:51 AM

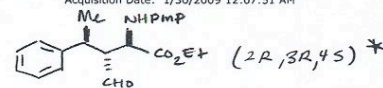

Run Information:  
 N.A.

BLS2-rmD2C3:

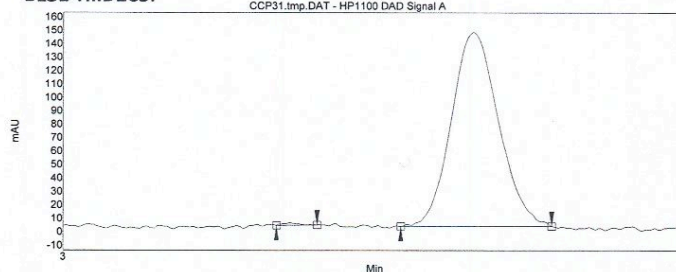

The Chromatogram Noise is 0

Results Table:

| Index | Name    | Start [Min] | Time [Min] | End [Min] | RT Offset [Min] | Quantity [% Area] | Height [uV] | Area [uV.Min] | Area [%] |
|-------|---------|-------------|------------|-----------|-----------------|-------------------|-------------|---------------|----------|
| 2     | UNKNOWN | 3.34        | 3.37       | 3.41      | 0.00            | 0.41              | 1.8         | 0.1           | 0.414    |
| 1     | UNKNOWN | 3.54        | 3.66       | 3.78      | 0.00            | 99.59             | 144.1       | 12.7          | 99.586   |
| Total |         |             |            |           |                 | 100.00            | 146.0       | 12.7          | 100.000  |

99.6 % ee

BergerSFC Chromatogram Report

Date: 2/28/2009  
 Time: 4:55:19 PM  
 Vial number: 2  
 Sequence name: bls12  
 Filename: BLS3-260\_syn\_ASH\_5-252

Method Name: ASH\_MeOH\_5-25  
 User Name: SFC User  
 Acquisition Date: 8/16/2008 9:28:23 PM

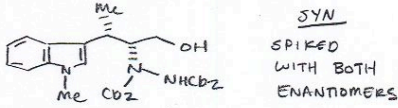

Run Information:  
 N.A.

BLS3-260\_syn\_ASH\_5-252:

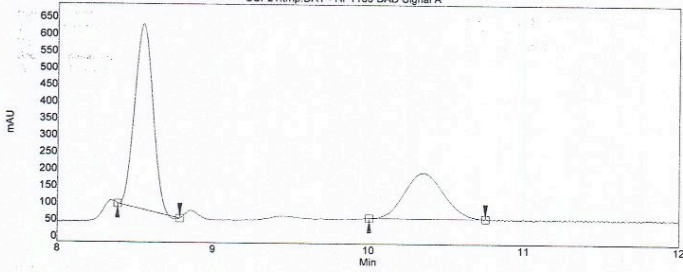

The Chromatogram Noise is 0

Results Table:

| Index | Name    | Start [Min] | Time [Min] | End [Min] | RT Offset [Min] | Quantity [% Area] | Height [µV] | Area [µV.Min] | Area [%] |
|-------|---------|-------------|------------|-----------|-----------------|-------------------|-------------|---------------|----------|
| 1     | UNKNOWN | 8.39        | 8.55       | 8.79      | 0.00            | 65.25             | 549.0       | 74.2          | 65.250   |
| 2     | UNKNOWN | 10.00       | 10.36      | 10.75     | 0.00            | 34.75             | 135.7       | 39.5          | 34.750   |
| Total |         |             |            |           |                 | 100.00            | 684.8       | 113.7         | 100.000  |

BergerSFC Chromatogram Report

Date: 2/28/2009  
 Time: 5:43:11 PM  
 Vial number: 3  
 Sequence name: jul65  
 Filename: BLS2-292\_ASH\_MeOH0

Method Name: ASH\_MeOH\_5-25  
 User Name: SFC User  
 Acquisition Date: 10/8/2008 10:44:25 AM

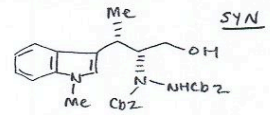

Run Information:  
 N.A.

BLS2-292\_ASH\_MeOH0:

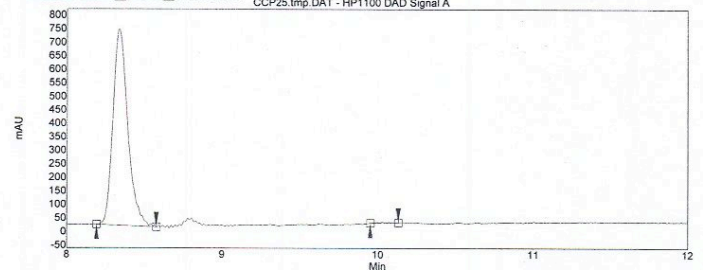

The Chromatogram Noise is 0

Results Table:

| Index | Name    | Start [Min] | Time [Min] | End [Min] | RT Offset [Min] | Quantity [% Area] | Height [µV] | Area [µV.Min] | Area [%] |
|-------|---------|-------------|------------|-----------|-----------------|-------------------|-------------|---------------|----------|
| 1     | UNKNOWN | 8.19        | 8.34       | 8.58      | 0.00            | 99.64             | 725.4       | 80.2          | 99.636   |
| 2     | UNKNOWN | 9.95        | 10.05      | 10.13     | 0.00            | 0.36              | 3.2         | 0.3           | 0.364    |
| Total |         |             |            |           |                 | 100.00            | 728.5       | 80.5          | 100.000  |

99.2% ee

BergerSFC Chromatogram Report

Date: 2/28/2009  
 Time: 4:29:08 PM  
 Vial number: 1  
 Sequence name: bls-1  
 Filename: BLS3-260\_anti\_ASH1

Method Name: ASH\_MeOH\_5-15  
 User Name: SFC User  
 Acquisition Date: 8/16/2008 8:40:04 PM

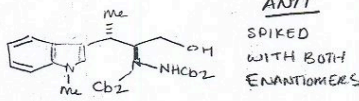

Run Information:  
 N.A.

BLS3-260\_anti\_ASH1:

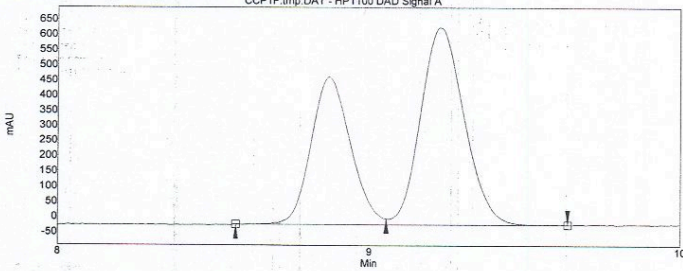

The Chromatogram Noise is 0

Results Table:

| Index | Name    | Start [Min] | Time [Min] | End [Min] | RT Offset [Min] | Quantity [% Area] | Height [µV] | Area [µV.Min] | Area [%] |
|-------|---------|-------------|------------|-----------|-----------------|-------------------|-------------|---------------|----------|
| 1     | UNKNOWN | 8.57        | 8.87       | 9.06      | 0.00            | 40.13             | 485.7       | 70.7          | 40.130   |
| 2     | UNKNOWN | 9.06        | 9.23       | 9.64      | 0.00            | 59.87             | 648.9       | 105.4         | 59.870   |
| Total |         |             |            |           |                 | 100.00            | 1134.6      | 176.1         | 100.000  |

BergerSFC Chromatogram Report

Date: 3/1/2009  
 Time: 10:25:22 PM  
 Vial number: 1  
 Sequence name: bls12  
 Filename: BLS3-260\_SS-D\_ASH3\_2

Method Name: ASH\_MeOH\_5-15  
 User Name: SFC User  
 Acquisition Date: 8/16/2008 11:16:32 PM

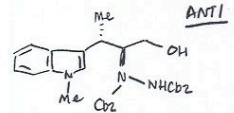

Run Information:  
 N.A.

BLS3-260\_SS-D\_ASH3\_2:

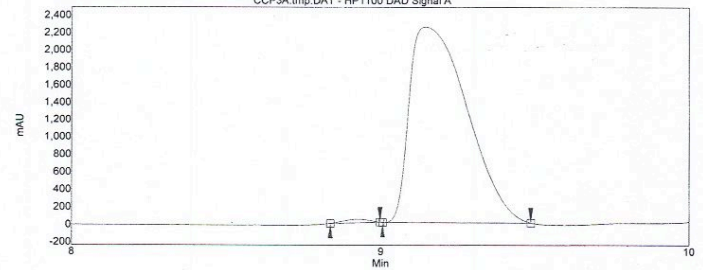

The Chromatogram Noise is 0

Results Table:

| Index | Name    | Start [Min] | Time [Min] | End [Min] | RT Offset [Min] | Quantity [% Area] | Height [µV] | Area [µV.Min] | Area [%] |
|-------|---------|-------------|------------|-----------|-----------------|-------------------|-------------|---------------|----------|
| 2     | UNKNOWN | 8.84        | 8.92       | 9.00      | 0.00            | 0.75              | 39.5        | 3.7           | 0.753    |
| 1     | UNKNOWN | 9.01        | 9.14       | 9.49      | 0.00            | 99.25             | 2241.7      | 488.3         | 99.247   |
| Total |         |             |            |           |                 | 100.00            | 2281.2      | 492.0         | 100.000  |

98.5% ee



BergerSFC Chromatogram Report

Date: 2/28/2009  
 Time: 10:29:00 AM  
 Vial number: 3  
 Sequence name: jul48  
 Filename: BLS2-2BLS2-288-syn\_rac\_ADH\_MeCN5

Method Name: ADH\_MeCN\_5-10  
 User Name: SFC User  
 Acquisition Date: 10/8/2008 11:45:59 AM

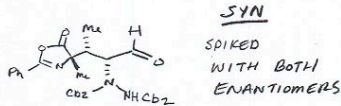

Run Information:  
 N.A.

BLS2-2BLS2-288-syn\_rac\_ADH\_MeCN5:

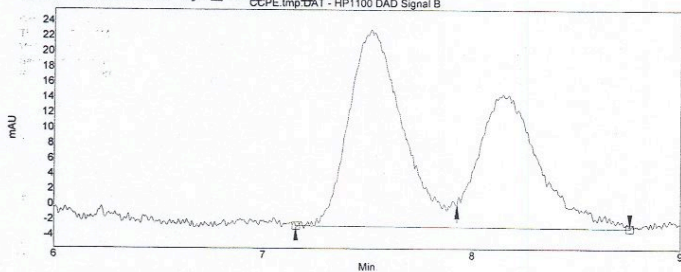

The Chromatogram Noise is 0

Results Table:

| Index | Name    | Start [Min] | Time [Min] | End [Min] | RT Offset [Min] | Quantity [% Area] | Height [uV] | Area [uV.Min] | Area [%] |
|-------|---------|-------------|------------|-----------|-----------------|-------------------|-------------|---------------|----------|
| 1     | UNKNOWN | 7.16        | 7.52       | 7.93      | 0.00            | 56.72             | 25.7        | 7.7           | 56.718   |
| 2     | UNKNOWN | 7.93        | 8.14       | 8.76      | 0.00            | 43.28             | 17.4        | 5.9           | 43.282   |
| Total |         |             |            |           |                 | 100.00            | 43.1        | 13.6          | 100.000  |

BergerSFC Chromatogram Report

Date: 2/28/2009  
 Time: 10:34:34 AM  
 Vial number: 1  
 Sequence name: jul48  
 Filename: BLS2-BLS2-288-SS-L\_ADH\_MeCN6

Method Name: ADH\_MeCN\_5-10  
 User Name: SFC User  
 Acquisition Date: 10/8/2008 1:40:53 PM

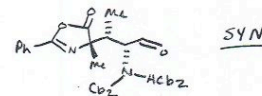

Run Information:  
 N.A.

BLS2-BLS2-288-SS-L\_ADH\_MeCN6:

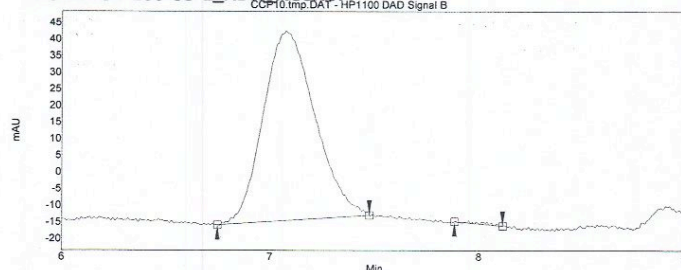

The Chromatogram Noise is 0

Results Table:

| Index | Name    | Start [Min] | Time [Min] | End [Min] | RT Offset [Min] | Quantity [% Area] | Height [uV] | Area [uV.Min] | Area [%] |
|-------|---------|-------------|------------|-----------|-----------------|-------------------|-------------|---------------|----------|
| 1     | UNKNOWN | 6.75        | 7.08       | 7.47      | 0.00            | 99.78             | 56.9        | 16.2          | 99.783   |
| 2     | UNKNOWN | 7.88        | 8.04       | 8.11      | 0.00            | 0.22              | 0.7         | 0.0           | 0.217    |
| Total |         |             |            |           |                 | 100.00            | 57.7        | 16.2          | 100.000  |

99.6% ee

BergerSFC Chromatogram Report

Date: 3/5/2009  
 Time: 1:21:03 AM  
 Vial number: 2  
 Sequence name: jul58  
 Filename: BLS2-289\_anti\_ASH\_MeCN2

Method Name: ASH\_MeCN\_5-25  
 User Name: SFC User  
 Acquisition Date: 10/7/2008 6:18:36 PM

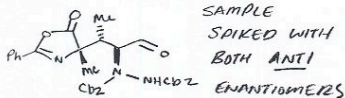

Run Information:  
 N.A.

BLS2-289\_anti\_ASH\_MeCN2:

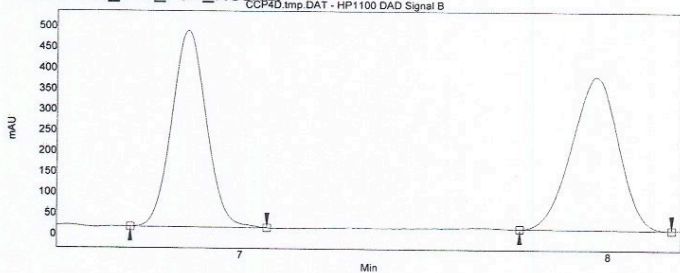

The Chromatogram Noise is 0

Results Table:

| Index | Name    | Start [Min] | Time [Min] | End [Min] | RT Offset [Min] | Quantity [% Area] | Height [uV] | Area [uV.Min] | Area [%] |
|-------|---------|-------------|------------|-----------|-----------------|-------------------|-------------|---------------|----------|
| 1     | UNKNOWN | 6.70        | 6.86       | 7.07      | 0.00            | 48.95             | 471.9       | 51.8          | 48.952   |
| 2     | UNKNOWN | 7.76        | 7.97       | 8.17      | 0.00            | 51.05             | 367.5       | 54.0          | 51.048   |
| Total |         |             |            |           |                 | 100.00            | 839.3       | 105.8         | 100.000  |

BergerSFC Chromatogram Report

Date: 3/5/2009  
 Time: 1:25:31 AM  
 Vial number: 2  
 Sequence name: jul58  
 Filename: BLS2-289\_SS-D\_ASH\_MeCN5

Method Name: ASH\_MeCN\_5-25  
 User Name: SFC User  
 Acquisition Date: 10/8/2008 12:24:54 PM

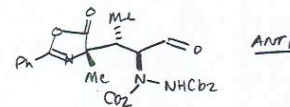

Run Information:  
 N.A.

BLS2-289\_SS-D\_ASH\_MeCN5:

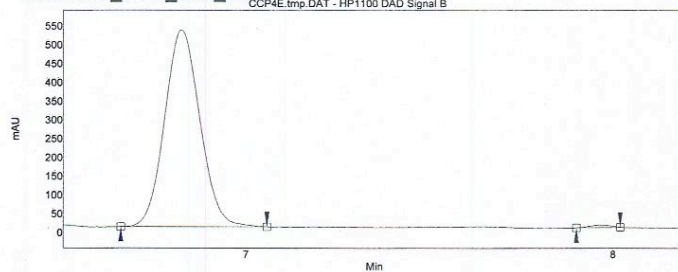

The Chromatogram Noise is 0

Results Table:

| Index | Name    | Start [Min] | Time [Min] | End [Min] | RT Offset [Min] | Quantity [% Area] | Height [uV] | Area [uV.Min] | Area [%] |
|-------|---------|-------------|------------|-----------|-----------------|-------------------|-------------|---------------|----------|
| 1     | UNKNOWN | 6.66        | 6.82       | 7.06      | 0.00            | 99.28             | 523.9       | 58.2          | 99.284   |
| 2     | UNKNOWN | 7.90        | 7.96       | 8.02      | 0.00            | 0.72              | 6.4         | 0.4           | 0.716    |
| Total |         |             |            |           |                 | 100.00            | 530.3       | 58.6          | 100.000  |

98.6% ee

BergerSFC Chromatogram Report

Date: 3/2/2009  
 Time: 11:11:39 AM  
 Vial number: 4  
 Sequence name: esther34  
 Filename: BLS3-208-RR-D\_OJH7

Method Name: OJH\_MeOH\_5-10  
 User Name: SFC User  
 Acquisition Date: 10/18/2008 1:56:15 PM

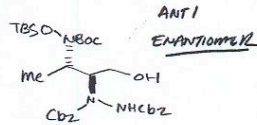

Run Information:  
 N.A.

**BLS3-208-RR-D\_OJH7:**

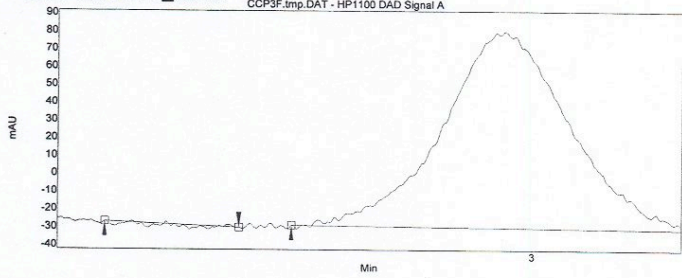

The Chromatogram Noise is 0

**Results Table:**

| Index | Name    | Start [Min] | Time [Min] | End [Min] | RT Offset [Min] | Quantity [% Area] | Height [uV] | Area [uV.Min] | Area [%] |
|-------|---------|-------------|------------|-----------|-----------------|-------------------|-------------|---------------|----------|
| 2     | UNKNOWN | 2.15        | 2.23       | 2.41      | 0.00            | 0.60              | 2.5         | 0.2           | 0.600    |
| 1     | UNKNOWN | 2.52        | 2.95       | 3.37      | 0.00            | 99.40             | 110.2       | 32.3          | 99.400   |
| Total |         |             |            |           |                 | 100.00            | 112.7       | 32.5          | 100.000  |

BergerSFC Chromatogram Report

Date: 3/2/2009  
 Time: 11:03:32 AM  
 Vial number: 3  
 Sequence name: esther32  
 Filename: BLS3-208-SS-L\_OJH7

Method Name: OJH\_MeOH\_5-10  
 User Name: SFC User  
 Acquisition Date: 10/18/2008 1:39:27 PM

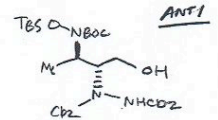

Run Information:  
 N.A.

**BLS3-208-SS-L\_OJH7:**

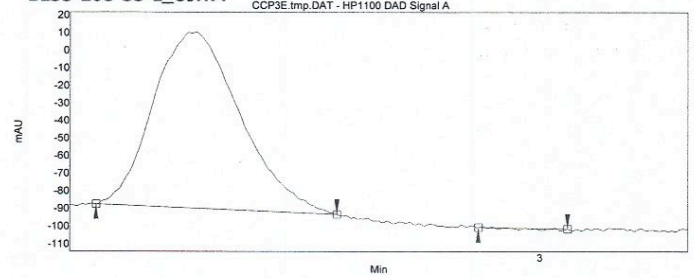

The Chromatogram Noise is 0

**Results Table:**

| Index | Name    | Start [Min] | Time [Min] | End [Min] | RT Offset [Min] | Quantity [% Area] | Height [uV] | Area [uV.Min] | Area [%] |
|-------|---------|-------------|------------|-----------|-----------------|-------------------|-------------|---------------|----------|
| 1     | UNKNOWN | 2.10        | 2.31       | 2.59      | 0.00            | 99.79             | 100.2       | 20.4          | 99.788   |
| 2     | UNKNOWN | 2.87        | 3.04       | 3.06      | 0.00            | 0.21              | 1.0         | 0.0           | 0.212    |
| Total |         |             |            |           |                 | 100.00            | 101.2       | 20.5          | 100.000  |

99.6% ee

BergerSFC Chromatogram Report

Date: 3/2/2009  
 Time: 11:29:20 AM  
 Vial number: 1  
 Sequence name: BL.Sassaydevelopment21  
 Filename: BLS3-208-syn\_OJH\_5\_MeCN3

Method Name: OJH\_MeCN\_5  
 User Name: SFC User  
 Acquisition Date: 11/12/2008 7:46:09 PM

**SYN**

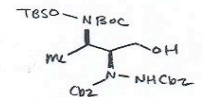

Run Information:  
 N.A.

**BLS3-208-syn\_OJH\_5\_MeCN3:**

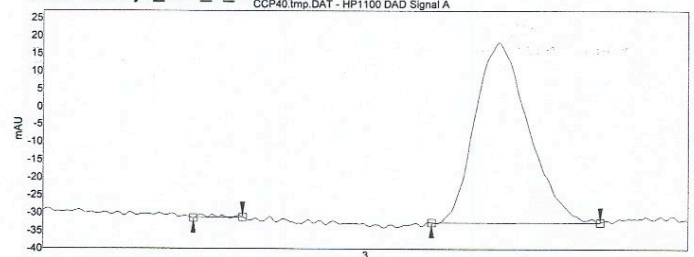

The Chromatogram Noise is 0

**Results Table:**

| Index | Name    | Start [Min] | Time [Min] | End [Min] | RT Offset [Min] | Quantity [% Area] | Height [uV] | Area [uV.Min] | Area [%] |
|-------|---------|-------------|------------|-----------|-----------------|-------------------|-------------|---------------|----------|
| 2     | UNKNOWN | 2.73        | 2.75       | 2.81      | 0.00            | 0.53              | 1.0         | 0.0           | 0.534    |
| 1     | UNKNOWN | 3.10        | 3.21       | 3.36      | 0.00            | 99.47             | 50.7        | 4.9           | 99.466   |
| Total |         |             |            |           |                 | 100.00            | 51.8        | 4.9           | 100.000  |

98.9% ee



BergerSFC Chromatogram Report

Date: 3/5/2009  
 Time: 1:52:57 AM  
 Vial number: 3  
 Sequence name: bls2  
 Filename: BLS3-245-Anti\_rac12

Method Name: ADH\_MeOH\_5-10  
 User Name: SFC User  
 Acquisition Date: 7/14/2008 10:42:21 PM

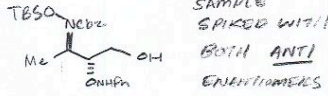

Run Information:  
 N.A.

BLS3-245-Anti\_rac12:

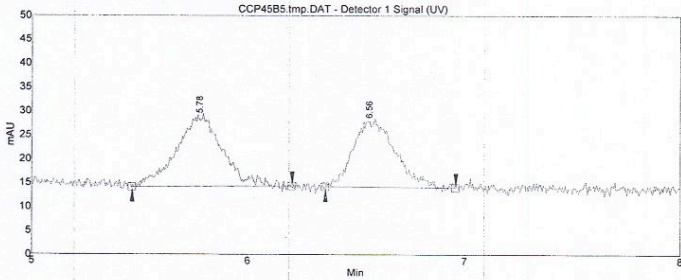

The Chromatogram Noise is 0

Results Table:

| Index | Name    | Time [Min] | Width USP [Min] | Quantity [% Area] | Height [uV] | Area [uV.Min] | Area [%] |
|-------|---------|------------|-----------------|-------------------|-------------|---------------|----------|
| 1     | UNKNOWN | 0.14       | 0.15            | 8.36              | 8.6         | 0.6           | 8.359    |
| 2     | UNKNOWN | 0.28       | 0.05            | 3.10              | 8.6         | 0.2           | 3.100    |
| 3     | UNKNOWN | 5.78       | 0.37            | 47.23             | 14.4        | 3.6           | 47.233   |
| 4     | UNKNOWN | 6.56       | 0.32            | 41.31             | 13.5        | 3.1           | 41.308   |
| Total |         |            |                 | 100.00            | 45.1        | 7.6           | 100.000  |

BergerSFC Chromatogram Report

Date: 3/5/2009  
 Time: 1:54:53 AM  
 Vial number: 8  
 Sequence name: bls-1  
 Filename: BLS3-245-L12

Method Name: ADH\_MeOH\_5-10  
 User Name: SFC User  
 Acquisition Date: 7/14/2008 10:07:21 PM

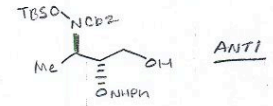

Run Information:  
 N.A.

BLS3-245-L12:

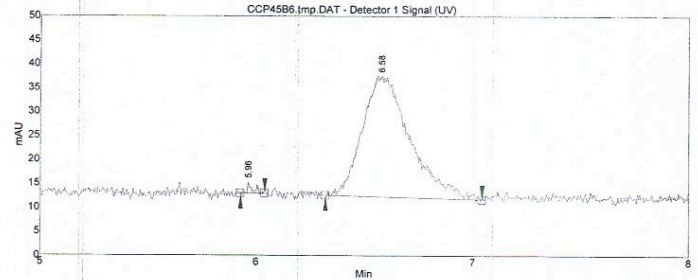

The Chromatogram Noise is 0

Results Table:

| Index | Name    | Time [Min] | Width USP [Min] | Quantity [% Area] | Height [uV] | Area [uV.Min] | Area [%] |
|-------|---------|------------|-----------------|-------------------|-------------|---------------|----------|
| 2     | UNKNOWN | 5.96       | 0.03            | 0.63              | 2.2         | 0.0           | 0.630    |
| 1     | UNKNOWN | 6.58       | 0.37            | 99.37             | 25.2        | 6.4           | 99.370   |
| Total |         |            |                 | 100.00            | 27.3        | 6.4           | 100.000  |

98.8% ee

BergerSFC Chromatogram Report

Date: 2/28/2009  
 Time: 5:51:41 PM  
 Vial number: 4  
 Sequence name: bls4  
 Filename: BLS3-245-Syn\_rac13

Method Name: ADH\_MeOH\_5-10  
 User Name: SFC User  
 Acquisition Date: 7/14/2008 11:05:36 PM

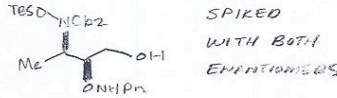

Run Information:  
 N.A.

BLS3-245-Syn\_rac13:

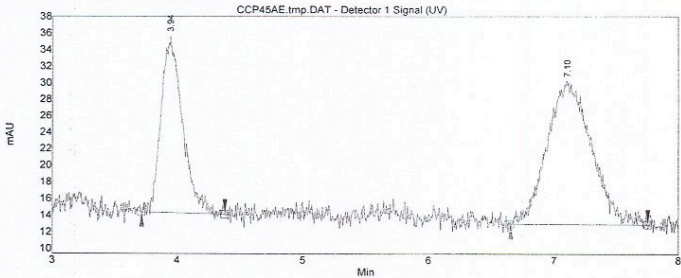

The Chromatogram Noise is 0

Results Table:

| Index | Name    | Time [Min] | Width USP [Min] | Quantity [% Area] | Height [uV] | Area [uV.Min] | Area [%] |
|-------|---------|------------|-----------------|-------------------|-------------|---------------|----------|
| 1     | UNKNOWN | 0.24       | 0.05            | 2.91              | 7.6         | 0.3           | 2.911    |
| 2     | UNKNOWN | 3.94       | 0.34            | 35.48             | 21.3        | 4.2           | 36.482   |
| 3     | UNKNOWN | 7.10       | 0.68            | 60.61             | 17.3        | 7.0           | 60.607   |
| Total |         |            |                 | 100.00            | 46.2        | 11.6          | 100.000  |

BergerSFC Chromatogram Report

Date: 2/28/2009  
 Time: 5:55:41 PM  
 Vial number: 7  
 Sequence name: bls2  
 Filename: BLS3-245-D12

Method Name: ADH\_MeOH\_5-10  
 User Name: SFC User  
 Acquisition Date: 7/14/2008 9:51:09 PM

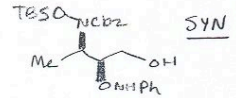

Run Information:  
 N.A.

BLS3-245-D12:

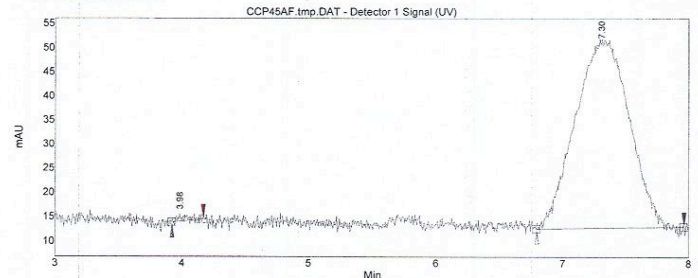

The Chromatogram Noise is 0

Results Table:

| Index | Name    | Time [Min] | Width USP [Min] | Quantity [% Area] | Height [uV] | Area [uV.Min] | Area [%] |
|-------|---------|------------|-----------------|-------------------|-------------|---------------|----------|
| 2     | UNKNOWN | 3.98       | 0.20            | 0.38              | 1.6         | 0.1           | 0.384    |
| 1     | UNKNOWN | 7.30       | 0.87            | 99.62             | 38.3        | 19.2          | 99.616   |
| Total |         |            |                 | 100.00            | 39.8        | 19.3          | 100.000  |

99.2% ee

Data File C:\CHEM32\2\DATA\BLS4\BLS2-101-Y2C.D  
 Sample Name: bls2-101-Y

=====  
 Acq. Operator : bls  
 Acq. Instrument : Col Mustard  
 Injection Date : 04-Mar-09, 15:04:20  
 Seq. Line : 6  
 Location : Vial 19  
 Inj : 1  
 Inj Volume : 5 µl  
 Different Inj Volume from Sequence !  
 Acq. Method : C:\CHEM32\2\METHODS\130-BLS2C.M  
 Last changed : 3/4/2009 1:02:29 PM by bls  
 Analysis Method : C:\CHEM32\2\METHODS\130-BLS2C.M  
 Last changed : 3/5/2009 3:11:38 AM by bls  
 (modified after loading)

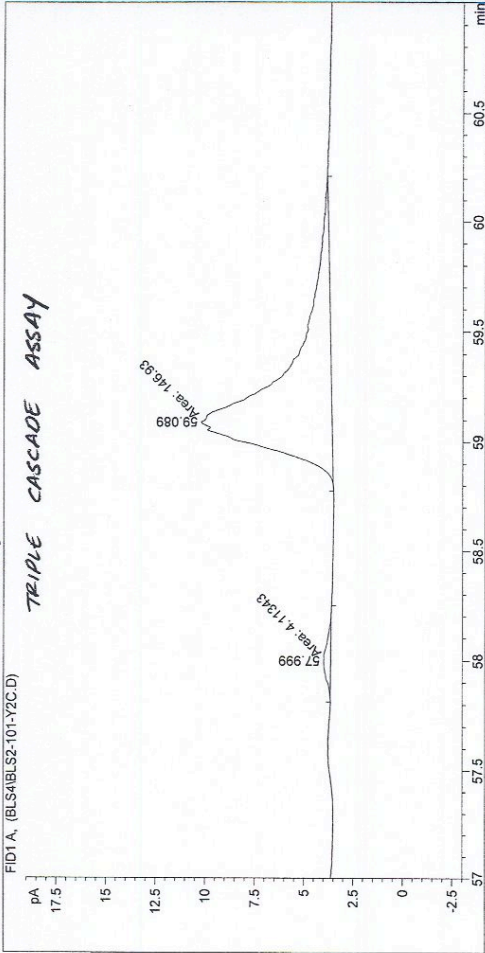

Area Percent Report

Sorted By : Signal  
 Multiplier : 1.0000  
 Dilution : 1.0000  
 Use Multiplier & Dilution Factor with ISTDs

Signal 1: FID1 A,

| Peak #   | RetTime [min] | Type | Width [min] | Area [pA*s] | Height [pA] | Area %    |         |
|----------|---------------|------|-------------|-------------|-------------|-----------|---------|
| 1        | 57.999        | MM   | 0.1882      | 4.11343     | 3.64213e-1  | 2.72334   |         |
| 2        | 59.089        | MM   | 0.3695      | 146.93028   | 6.62668     | 97.27666  |         |
| Totals : |               |      |             |             |             | 151.04371 | 6.99089 |

\*\*\* End of Report \*\*\*

Data File C:\CHEM32\2\DATA\BLS4\BLS2-101-IM-RAC.D  
 Sample Name: bls2-101-rac

=====  
 Acq. Operator : bls  
 Acq. Instrument : Col Mustard  
 Injection Date : 03-Mar-09, 09:09:18  
 Seq. Line : 4  
 Location : Vial 20  
 Inj : 1  
 Inj Volume : 5 µl  
 Different Inj Volume from Sequence !  
 Acq. Method : C:\CHEM32\2\METHODS\130-BLS.M  
 Last changed : 3/3/2009 9:08:12 AM by bls  
 (modified after loading)  
 Analysis Method : C:\CHEM32\2\METHODS\130-BLS2C.M  
 Last changed : 3/5/2009 3:16:08 AM by bls  
 (modified after loading)

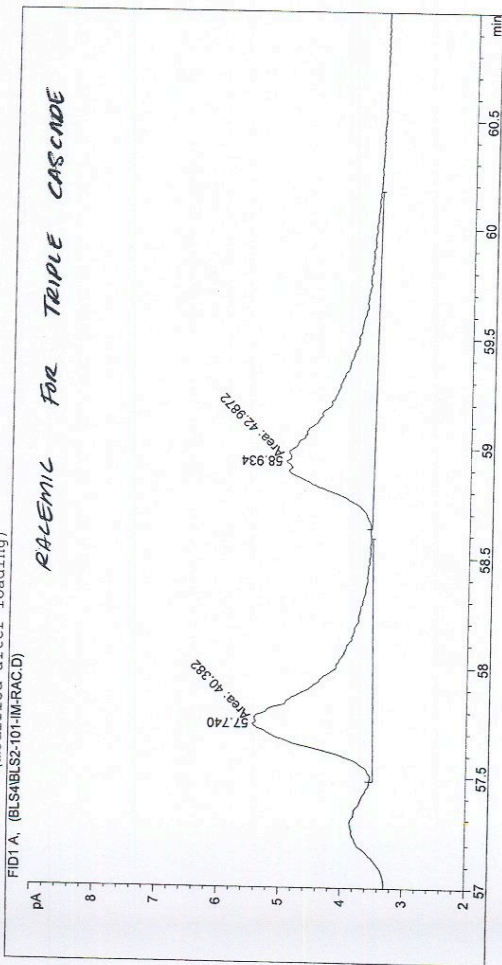

Area Percent Report

Sorted By : Signal  
 Multiplier : 1.0000  
 Dilution : 1.0000  
 Use Multiplier & Dilution Factor with ISTDs

Signal 1: FID1 A,

| Peak #   | RetTime [min] | Type | Width [min] | Area [pA*s] | Height [pA] | Area %   |         |
|----------|---------------|------|-------------|-------------|-------------|----------|---------|
| 1        | 57.740        | MM   | 0.3466      | 40.38200    | 1.94206     | 48.43753 |         |
| 2        | 58.934        | MM   | 0.5055      | 42.98724    | 1.41719     | 51.56247 |         |
| Totals : |               |      |             |             |             | 83.36923 | 3.35925 |
